# Supplementary material for: Biogeographical survey of soil microbiomes across sub-Saharan Africa: structure, drivers, and predicted climate-driven changes
Source: Microbiome. 2022 Aug 23;10:131. doi: 10.1186/s40168-022-01297-w (PMC9396824; doi:10.1186/s40168-022-01297-w)
Supplement: Supplementary file 13 — Additional file 12. Table S1. Metadata for all the sites used in the study, which include the latitude and longitude GPS coordinates, physicochemical properties of the sample soils, macroclimatic variables for each site, and soil texture and land cover classifications based on the macroclimatic variables. [file 40168_2022_1297_MOESM12_ESM.csv]

sample-id	Corrected_Longitude	Corrected_Latitudes	Country	pH	pH_general	pH_10_levels	K	Ca	Mg	Na	P	N_Percent	C_Percent	Sand_Percent	Silt_Percent	Clay_Percent	soil_class	general_texture	Aridity_index_2000	Aridity_class_2000	EVI2	Bio1	Bio3	Bio4	Bio6	Bio12	Bio14	Bio15	Land_cover	LC_Code
BJ1	2.1487	6.6949	Benin	6.02	Acidic	Moderately_acid	32.93	999.03	237.02	25.46	14.05	0.21	1.2	78	2	20	Sandy_loam	Mod_coarse	0.7008	Humid	5018	26.9	72	1236	216	1070	9	63	_Mosaic_Vegetation_(grassland,_shrubland,_forest)_(50-70%)_/_Cropland_(20-50%)__	LC_3
BJ10	2.6616	10.2195	Benin	7.47	Alkaline	Slightly_alkaline	168.72	5561.17	327.19	32.15	183.93	0.14	1.82	67	13	20	Sandy_loam	Mod_coarse	0.5418	Dry_sub_humid	1955	26.2	68	1541	169	1134	1	99	_Closed_to_open_(>15%)_shrubland_(<5m)	LC_12
BJ11	2.782	10.7116	Benin	6.18	Acidic	Slightly_acid	32.19	563.82	103.98	15.15	12.19	0.07	0.8	78	9	13	Loamy_sand	Coarse	0.4642	Semi_arid	2368	26.9	62	1926	165	1081	0	104	_Mosaic_Cropland_(50-70%)_/_Vegetation_(grassland,_shrubland,_forest)_(20-50%)	LC_2
BJ12	2.8399	10.8453	Benin	6.14	Acidic	Slightly_acid	28.43	902.58	92.65	26.33	22.77	0.11	0.9	65	23	13	Sandy_loam	Mod_coarse	0.446	Semi_arid	1751	27	60	2060	161	1064	0	106	_Mosaic_Cropland_(50-70%)_/_Vegetation_(grassland,_shrubland,_forest)_(20-50%)	LC_2
BJ13	2.9192	11.1131	Benin	6.08	Acidic	Moderately_acid	39.71	672.05	141.4	24.9	7.62	0.06	0.66	78	8	14	Loamy_sand	Coarse	0.4221	Semi_arid	1581	27.4	57	2341	157	1016	0	109	_Mosaic_Cropland_(50-70%)_/_Vegetation_(grassland,_shrubland,_forest)_(20-50%)	LC_2
BJ14	3.1117	11.5175	Benin	5.34	Acidic	Strongly_acid	28	218.62	52.03	17.79	5.64	0.04	0.41	63	20	17	Sandy_loam	Mod_coarse	0.3649	Semi_arid	1854	28	58	2395	167	903	0	113	_Mosaic_Cropland_(50-70%)_/_Vegetation_(grassland,_shrubland,_forest)_(20-50%)	LC_2
BJ15	3.3686	11.7878	Benin	4.77	Acidic	Very_strongly_acid	20.45	60.68	17.79	14.58	8.23	0.02	0.13	82	5	12	Loamy_sand	Coarse	0.338	Semi_arid	1440	28.9	57	2464	180	901	0	117	_Mosaic_Cropland_(50-70%)_/_Vegetation_(grassland,_shrubland,_forest)_(20-50%)	LC_2
BJ2	2.1709	7.025	Benin	6.19	Acidic	Slightly_acid	32.43	1062.04	179.55	24.54	15.54	0.11	0	74	8	18	Sandy_clay_loam	Mod_fine	0.6579	Humid	3992	27.8	72	1352	219	1055	4	61	_Mosaic_Cropland_(50-70%)_/_Vegetation_(grassland,_shrubland,_forest)_(20-50%)	LC_2
BJ3	2.0756	7.3467	Benin	6.31	Acidic	Slightly_acid	74	1444.4	174.78	24.61	8.83	0.13	1.08	64	3	33	Sandy_clay_loam	Mod_fine	0.6867	Humid	2733	27.1	71	1366	209	1104	5	63	_Mosaic_Cropland_(50-70%)_/_Vegetation_(grassland,_shrubland,_forest)_(20-50%)	LC_2
BJ4	2.1873	7.7411	Benin	6.51	Acidic	Slightly_acid	64.32	678.04	96.28	19.62	17.22	0.04	0.57	85	2	13	Loamy_sand	Coarse	0.6647	Humid	2562	27.4	73	1338	212	1161	4	68	_Closed_to_open_(>15%)_shrubland_(<5m)	LC_12
BJ5	2.5021	8.0483	Benin	6.75	Neutral	Neutral	38.9	1244.41	97.69	47.7	22.18	0.07	0.79	70	12	18	Sandy_loam	Mod_coarse	0.6549	Humid	2236	27.3	71	1438	206	1110	5	70	_Closed_to_open_(>15%)_shrubland_(<5m)	LC_12
BJ6	2.6111	8.4064	Benin	6.14	Acidic	Slightly_acid	60.13	1603.83	185.84	25.34	24.95	0.12	1.4	79	6	16	Loamy_sand	Coarse	0.6487	Dry_sub_humid	3186	26.7	68	1459	193	1103	6	73	_Closed_to_open_(>15%)_shrubland_(<5m)	LC_12
BJ7	2.6065	8.8254	Benin	5.66	Acidic	Moderately_acid	46.61	642.63	146.08	18.77	8.41	0.11	1.32	87	1	12	Loamy_sand	Coarse	0.6179	Dry_sub_humid	3055	26.3	66	1453	180	1121	7	74	_Mosaic_Cropland_(50-70%)_/_Vegetation_(grassland,_shrubland,_forest)_(20-50%)	LC_2
BJ8	2.5672	9.2285	Benin	5.66	Acidic	Moderately_acid	26.6	346.14	55.47	11.91	9.99	0.04	0.39	84	8	8	Loamy_sand	Coarse	0.6259	Dry_sub_humid	3002	26.4	67	1463	179	1158	5	82	_Mosaic_Cropland_(50-70%)_/_Vegetation_(grassland,_shrubland,_forest)_(20-50%)	LC_2
BJ9	2.715	9.8414	Benin	6.76	Neutral	Neutral	60.91	2039.17	126.2	24.5	63.35	0.08	0.83	82	6	12	Loamy_sand	Coarse	0.538	Dry_sub_humid	2161	26.3	68	1417	174	1085	1	94	_Closed_to_open_(>15%)_shrubland_(<5m)	LC_12
BW01	26.19777778	-24.33583333	Botswana	5.84	Acidic	Moderately_acid	47.45	141.38	35.15	14.3	8.14	0.03	0.33	90	0	10	Sand	Coarse	0.2015	Semi_arid	2053	20.4	53	4746	31	455	3	79	_Open_(15-40%)_broadleaved_deciduous_forest_(>5m)	LC_6
BW02	26.64388889	-23.94083333	Botswana	5.84	Acidic	Moderately_acid	26.44	86.89	33.46	13.7	6.15	0.02	0.29	90	0	10	Sand	Coarse	0.2066	Semi_arid	2296	20.9	55	4598	35	443	2	82	_Closed_to_open_(>15%)_grassland	LC_13
BW03	26.89138889	-23.71555556	Botswana	7.84	Alkaline	Slightly_alkaline	331.87	4305.84	215.57	36.65	50.05	0.09	0.94	77	3	20	Sandy_clay_loam	Mod_fine	0.1858	Arid	2896	20.9	55	4612	32	448	3	82	_Closed_to_open_(>15%)_grassland	LC_13
BW04	27.10638889	-23.09583333	Botswana	5.67	Acidic	Moderately_acid	48.34	238.69	39.23	15.37	16.58	0.04	0.86	83	1	16	Loamy_sand	Coarse	0.1971	Arid	3392	20.3	55	4624	27	443	2	86	_Closed_to_open_(>15%)_grassland	LC_13
BW05	27.1975	-22.795	Botswana	6.88	Neutral	Neutral	623.41	2972.35	373.63	32.39	18.48	0.25	2.5	55	9	36	Sandy_clay	Fine	0.2013	Semi_arid	2961	20.1	55	4518	30	432	1	86	_Mosaic_Vegetation_(grassland,_shrubland,_forest)_(50-70%)_/_Cropland_(20-50%)__	LC_3
BW06	27.46277778	-22.9875	Botswana	7.34	Neutral	Neutral	411.93	1573.17	505.93	29.71	13.14	0.08	0.96	73	1	26	Sandy_clay_loam	Mod_fine	0.1801	Arid	2853	20.7	54	4747	31	403	1	84	_Mosaic_Vegetation_(grassland,_shrubland,_forest)_(50-70%)_/_Cropland_(20-50%)__	LC_3
BW07	28.05861111	-23.04194444	Botswana	7.08	Neutral	Neutral	105.08	788.46	142.89	22.23	10.03	0.05	0.6	85	0	15	Loamy_sand	Coarse	0.191	Arid	2478	21.3	54	4346	51	406	1	90	_Mosaic_Vegetation_(grassland,_shrubland,_forest)_(50-70%)_/_Cropland_(20-50%)__	LC_3
BW08	28.07333333	-23.22888889	Botswana	6.85	Neutral	Neutral	291.47	3611.34	1164.75	69.34	24.71	0.22	2.17	50	12	38	Sandy_clay	Fine	0.2036	Semi_arid	2615	20.9	54	4290	47	428	1	88	_Mosaic_Vegetation_(grassland,_shrubland,_forest)_(50-70%)_/_Cropland_(20-50%)__	LC_3
BW09	27.75694444	-22.74194444	Botswana	6.09	Acidic	Moderately_acid	153.74	263.83	78.56	15.32	18.72	0.05	0.62	89	0	11	Sand	Coarse	0.183	Arid	3311	20.1	55	4422	36	437	2	85	_Closed_to_open_(>15%)_shrubland_(<5m)	LC_12
BW10	28.15638889	-22.27944444	Botswana	5.95	Acidic	Moderately_acid	132.22	393.9	135.38	18.68	18.76	0.04	0.51	75	3	22	Sandy_clay_loam	Mod_fine	0.1776	Arid	3102	20.9	56	4087	49	380	1	91	_Open_(15-40%)_broadleaved_deciduous_forest_(>5m)	LC_6
BW11	27.81833333	-22.18638889	Botswana	4.51	Acidic	Very_strongly_acid	283.37	673.79	236.85	38.33	44.17	0.12	1.51	48	9	43	Sandy_clay	Fine	0.172	Arid	2866	20.6	56	4172	45	387	0	90	_Mosaic_Vegetation_(grassland,_shrubland,_forest)_(50-70%)_/_Cropland_(20-50%)__	LC_3
BW12	27.82	-21.84388889	Botswana	6.75	Neutral	Neutral	155.81	1252.16	163.88	21.75	60.37	0.08	0.96	72	1	26	Sandy_clay_loam	Mod_fine	0.1586	Arid	3360	21	56	4004	52	368	0	94	_Closed_to_open_(>15%)_grassland	LC_13
BW13	27.59055556	-21.41055556	Botswana	6.58	Neutral	Neutral	117.49	753.65	209.82	18.69	9.6	0.06	0.74	77	5	18	Sandy_clay_loam	Mod_fine	0.1833	Arid	3342	20.7	56	3867	56	414	0	93	_Mosaic_Vegetation_(grassland,_shrubland,_forest)_(50-70%)_/_Cropland_(20-50%)__	LC_3
BW14	27.72555556	-20.895	Botswana	6.46	Acidic	Slightly_acid	70.36	506.01	90.48	13.86	27.61	0.05	0.79	86	0	14	Loamy_sand	Coarse	0.2105	Semi_arid	2675	19.9	56	3568	57	501	0	97	_Closed_to_open_(>15%)_grassland	LC_13
BW15	27.78361111	-20.65916667	Botswana	6.5	Acidic	Slightly_acid	59.96	1015.65	230.15	25.38	5.99	0.03	0.46	78	0	22	Sandy_clay_loam	Mod_fine	0.2417	Semi_arid	2361	19.4	56	3376	58	543	0	97	_Closed_to_open_(>15%)_grassland	LC_13
BW16	27.49583333	-20.74861111	Botswana	7.09	Neutral	Neutral	128.71	1934.46	1048.74	85.05	10.37	0.06	0.79	60	6	35	Sandy_clay_loam	Mod_fine	0.2124	Semi_arid	2976	19.8	56	3598	56	469	0	94	_Mosaic_Vegetation_(grassland,_shrubland,_forest)_(50-70%)_/_Cropland_(20-50%)__	LC_3
BW17	27.03583333	-20.82805556	Botswana	6.29	Acidic	Slightly_acid	62.87	531.18	107.95	14.1	11.89	0.07	0.99	86	0	14	Loamy_sand	Coarse	0.1894	Arid	3038	20	56	3764	52	443	0	98	_Closed_to_open_(>15%)_grassland	LC_13
BW18	26.58333333	-20.63666667	Botswana	7.09	Neutral	Neutral	162.37	1593.74	229.92	20.72	24.64	0.11	1.37	80	1	19	Sandy_clay_loam	Mod_fine	0.1699	Arid	3372	20.8	56	3772	54	378	0	97	_Mosaic_Vegetation_(grassland,_shrubland,_forest)_(50-70%)_/_Cropland_(20-50%)__	LC_3
BW19	26.98333333	-21.24388889	Botswana	7.09	Neutral	Neutral	161.06	1267.17	242.49	18.74	4.29	0.09	1.07	77	1	22	Sandy_clay_loam	Mod_fine	0.1928	Arid	2876	20	55	3924	48	434	0	94	_Mosaic_Vegetation_(grassland,_shrubland,_forest)_(50-70%)_/_Cropland_(20-50%)__	LC_3
BW20	26.63666667	-21.22666667	Botswana	8.03	Alkaline	Moderately_alkaline	191.2	2343.09	190.97	22.13	5.11	0.06	0.79	84	0	16	Loamy_sand	Coarse	0.1628	Arid	2783	20.4	56	3945	49	396	0	94	_Closed_to_open_(>15%)_grassland	LC_13
BW21	26.34583333	-21.42388889	Botswana	7.67	Alkaline	Slightly_alkaline	178.09	1638.21	170.08	22.3	5.36	0.05	0.68	84	0	16	Loamy_sand	Coarse	0.1544	Arid	3131	20.1	56	3952	45	395	0	96	_Mosaic_Vegetation_(grassland,_shrubland,_forest)_(50-70%)_/_Cropland_(20-50%)__	LC_3
BW22	25.73888889	-21.44694444	Botswana	7.19	Neutral	Neutral	69.94	840.92	119.53	14.28	5.62	0.03	0.5	88	0	12	Sand	Coarse	0.1303	Arid	2947	20.6	56	3964	47	372	0	92	_Closed_to_open_(>15%)_grassland	LC_13
BW23	25.99611111	-21.95944444	Botswana	6.43	Acidic	Slightly_acid	21.79	219.36	41.57	9.37	1.82	0.02	0.38	90	0	10	Sand	Coarse	0.1516	Arid	2653	19.8	56	3994	39	403	0	91	_Mosaic_Forest/Shrubland_(50-70%)_/_Grassland_(20-50%)	LC_10
BW24	26.5	-22.05861111	Botswana	8.25	Alkaline	Moderately_alkaline	349.38	8576.32	1144.2	77.64	5.78	0.08	0.86	53	3	44	Sandy_clay	Fine	0.1979	Arid	3517	19.1	56	4059	33	446	0	90	_Closed_to_open_(>15%)_shrubland_(<5m)	LC_12
BW25	26.83194444	-22.31277778	Botswana	5.57	Acidic	Strongly_acid	43.52	131.23	35.29	11.93	6.82	0.02	0.5	90	0	10	Sand	Coarse	0.2003	Semi_arid	4471	19.3	56	4172	31	452	0	90	_Closed_to_open_(>15%)_shrubland_(<5m)	LC_12
BW26	27.07527778	-22.65222222	Botswana	7.17	Neutral	Neutral	137.98	2114.07	199.69	24.18	9.2	0.1	1.45	81	0	19	Sandy_clay_loam	Mod_fine	0.1827	Arid	3040	20	56	4438	31	432	1	87	_Closed_to_open_(>15%)_shrubland_(<5m)	LC_12
BW27	27.39222222	-22.39027778	Botswana	6.36	Acidic	Slightly_acid	141.77	641	245.62	21.22	7.9	0.04	0.57	79	0	21	Sandy_clay_loam	Mod_fine	0.1785	Arid	3013	20.2	55	4415	35	416	0	90	_Mosaic_Vegetation_(grassland,_shrubland,_forest)_(50-70%)_/_Cropland_(20-50%)__	LC_3
BW28	27.64	-21.21888889	Botswana	7.32	Neutral	Neutral	183.23	4450.31	604.97	41.25	4.67	0.07	0.87	55	8	37	Sandy_clay	Fine	0.2009	Semi_arid	3042	20.8	56	3748	59	452	0	93	_Closed_to_open_(>15%)_grassland	LC_13
BW29	26.39055556	-20.53722222	Botswana	10.28	Alkaline	Very_strongly_alkaline	1025.07	8867.28	138.84	3833.51	0.47	0.03	0.54	80	0	20	Sandy_clay_loam	Mod_fine	0.1615	Arid	2999	21.2	56	3772	57	367	0	98	_Mosaic_Vegetation_(grassland,_shrubland,_forest)_(50-70%)_/_Cropland_(20-50%)__	LC_3
BW30	26.17555556	-20.06861111	Botswana	8.4	Alkaline	Moderately_alkaline	149.98	7692.63	176.42	43.81	4.91	0.11	1.31	77	9	14	Loamy_sand	Coarse	0.1596	Arid	3154	21.5	56	3637	60	398	0	100	_Mosaic_Vegetation_(grassland,_shrubland,_forest)_(50-70%)_/_Cropland_(20-50%)__	LC_3
BW31	26.00722222	-19.54277778	Botswana	8.8	Alkaline	Strongly_alkaline	28.94	3442.37	86.41	22.5	5.01	0.01	0.27	89	0	11	Sand	Coarse	0.1885	Arid	3133	21.5	55	3557	60	450	0	106	_Closed_to_open_(>15%)_shrubland_(<5m)	LC_12
BW32	25.87222222	-19.34277778	Botswana	8.76	Alkaline	Strongly_alkaline	34.64	4768.29	111	25.65	5.2	0.03	0.48	90	0	10	Sand	Coarse	0.2001	Semi_arid	4423	21.6	55	3513	63	465	0	107	_Closed_to_open_(>15%)_shrubland_(<5m)	LC_12
BW33	25.75305556	-18.73888889	Botswana	7.99	Alkaline	Moderately_alkaline	338.72	4370.18	2264.92	131.05	16.72	0.05	0.66	14	8	78	Clay	Fine	0.237	Semi_arid	3640	21.5	55	3391	65	526	0	109	_Closed_to_open_(>15%)_grassland	LC_13
BW34	25.55055556	-18.57583333	Botswana	8.58	Alkaline	Strongly_alkaline	372.78	6011.92	1902.24	132.3	3.97	0.07	0.94	29	7	63	Clay	Fine	0.2214	Semi_arid	1050	21.5	55	3383	64	510	0	108	_Open_(15-40%)_broadleaved_deciduous_forest_(>5m)	LC_6
BW35	25.42805556	-18.15666667	Botswana	7.71	Alkaline	Slightly_alkaline	17.72	1213.45	49.52	17.69	9.11	0.03	0.63	91	0	9	Sand	Coarse	0.2392	Semi_arid	4317	21.8	55	3342	67	616	0	111	_Closed_to_open_(>15%)_grassland	LC_13
BW36	24.99805556	-18.08194444	Botswana	6.5	Acidic	Slightly_acid	23.81	226.93	37.35	17.84	8.53	0.02	0.55	91	0	9	Sand	Coarse	0.2356	Semi_arid	3834	22.2	56	3313	69	594	0	111	_Closed_to_open_(>15%)_grassland	LC_13
BW37	24.49194444	-18.33166667	Botswana	8.75	Alkaline	Strongly_alkaline	47.05	4977.22	129.96	43.81	3.46	0.05	0.71	84	0	16	Loamy_sand	Coarse	0.2206	Semi_arid	4383	22	55	3545	61	542	0	110	_Closed_(>40%)_broadleaved_deciduous_forest_(>5m)	LC_5
BW38	25.97111111	-20.29611111	Botswana	8.62	Alkaline	Strongly_alkaline	103.39	4274.63	190.15	44.97	6.31	0.03	0.64	89	0	11	Sand	Coarse	0.1426	Arid	2325	21.6	55	3720	59	377	0	100	_Sparse_(>15%)_vegetation_(woody_vegetation,_shrubs,_grassland)	LC_14
BW39	25.26305556	-20.29333333	Botswana	8.5	Alkaline	Strongly_alkaline	190.29	4798.37	389.32	57.01	7.61	0.07	0.79	79	5	16	Loamy_sand	Coarse	0.1402	Arid	2946	21.8	56	3748	62	399	0	99	_Closed_to_open_(>15%)_grassland	LC_13
BW40	25.03222222	-20.32416667	Botswana	8.03	Alkaline	Moderately_alkaline	37.51	664.71	113.82	19.39	4.48	0.02	0.44	92	0	8	Sand	Coarse	0.1384	Arid	2898	21.8	56	3787	62	394	0	101	_Closed_to_open_(>15%)_grassland	LC_13
BW41	24.33638889	-20.23611111	Botswana	8.4	Alkaline	Moderately_alkaline	28.41	1722.77	134.28	31.11	8.63	0.04	0.59	92	0	8	Sand	Coarse	0.1483	Arid	3721	22.1	55	3844	64	400	0	101	_Closed_to_open_(>15%)_grassland	LC_13
BW42	24.01027778	-20.18527778	Botswana	7.51	Alkaline	Slightly_alkaline	58.94	612.28	110.22	22.07	5.97	0.03	0.52	95	0	5	Sand	Coarse	0.1469	Arid	4443	22.1	55	3872	64	414	0	102	_Closed_to_open_(>15%)_grassland	LC_13
BW43	23.73916667	-20.07777778	Botswana	6.31	Acidic	Slightly_acid	248.6	2314.24	317.98	78.47	5.65	0.26	3.03	70	7	23	Sandy_clay_loam	Mod_fine	0.1524	Arid	3744	22.2	55	3860	66	438	0	102	_Closed_to_open_(>15%)_grassland	LC_13
BW44	24.63972222	-20.54361111	Botswana	7.17	Neutral	Neutral	54	533.35	109.79	16.36	4.47	0.04	0.4	94	0	6	Sand	Coarse	0.1343	Arid	3452	21.9	56	3872	62	371	0	101	_Closed_to_open_(>15%)_grassland	LC_13
BW45	24.52722222	-20.83166667	Botswana	8.38	Alkaline	Moderately_alkaline	97.75	1080.5	146.69	23.85	10.85	0.05	0.49	93	0	7	Sand	Coarse	0.1268	Arid	2196	21.9	56	3959	60	355	0	97	_Closed_to_open_(>15%)_grassland	LC_13
BW46	24.82388889	-21.16083333	Botswana	7.99	Alkaline	Moderately_alkaline	255.29	3730.7	255.96	60.28	12.6	0.12	1.12	66	10	24	Sandy_clay_loam	Mod_fine	0.1191	Arid	1976	21.6	56	3992	56	344	0	95	_Closed_to_open_(>15%)_grassland	LC_13
BW47	25.06277778	-21.31305556	Botswana	8.67	Alkaline	Strongly_alkaline	114.91	5138.3	104.28	58.01	4.91	0.04	0.42	92	0	8	Sand	Coarse	0.1171	Arid	3035	21.4	56	4006	54	351	0	93	_Mosaic_Vegetation_(grassland,_shrubland,_forest)_(50-70%)_/_Cropland_(20-50%)__	LC_3
BW48	23.40722222	-20.25222222	Botswana	7.56	Alkaline	Slightly_alkaline	160.62	1116.17	415.2	21.08	7.39	0.06	0.61	85	0	15	Loamy_sand	Coarse	0.1466	Arid	3862	22.2	55	3916	64	441	0	102	_Closed_to_open_(>15%)_grassland	LC_13
BW49	22.90805556	-20.49916667	Botswana	7.09	Neutral	Neutral	141	599.99	112.77	14.32	22.43	0.05	0.52	90	0	10	Sand	Coarse	0.1373	Arid	3324	22.2	56	4035	62	424	0	100	_Mosaic_Vegetation_(grassland,_shrubland,_forest)_(50-70%)_/_Cropland_(20-50%)__	LC_3
BW50	22.84194444	-20.51888889	Botswana	6.13	Acidic	Slightly_acid	1040.43	5575.66	920.01	131.82	21.45	0.44	0.61	27	51	22	Silty_loam	Medium	0.1345	Arid	2800	22.2	56	4073	62	420	0	99	_Closed_to_open_(>15%)_grassland	LC_13
BW51	22.54222222	-20.35472222	Botswana	6.87	Neutral	Neutral	81.68	693.6	92.78	17.38	6.99	0.05	0.48	89	1	10	Loamy_sand	Coarse	0.1305	Arid	2791	22.4	56	4088	62	425	0	101	_Closed_to_open_(>15%)_grassland	LC_13
BW52	22.42972222	-19.95916667	Botswana	8.24	Alkaline	Moderately_alkaline	144.2	7321.62	260.64	39.36	23.87	0.1	0.97	86	2	12	Loamy_sand	Coarse	0.1412	Arid	2882	22.4	55	4002	63	431	0	103	_Closed_to_open_(>15%)_grassland	LC_13
BW53	22.18111111	-19.58555556	Botswana	6.73	Neutral	Neutral	23.08	596.11	47.71	13.09	16.2	0.07	0.69	94	0	6	Sand	Coarse	0.1522	Arid	4065	22.3	55	3922	62	434	0	102	_Closed_to_open_(>15%)_shrubland_(<5m)	LC_12
BW54	22.36694444	-18.965	Botswana	5.98	Acidic	Moderately_acid	13.09	265.24	32.34	11.34	5.17	0.03	0.44	95	0	5	Sand	Coarse	0.1863	Arid	2994	22.2	55	3834	61	451	0	103	_Open_(15-40%)_broadleaved_deciduous_forest_(>5m)	LC_6
BW55	22.1625	-18.62722222	Botswana	5.96	Acidic	Moderately_acid	7.52	245.08	20.84	6.28	5.12	0.04	0.61	96	0	4	Sand	Coarse	0.1969	Arid	3907	22.1	56	3750	61	456	0	100	_Closed_to_open_(>15%)_vegetation_(grassland,_shrubland,_woody_vegetation)_on_regularly_flooded_or_waterlogged_soil_-_Fresh,_brackish_or_saline_water	LC_17
BW56	21.87444444	-18.32722222	Botswana	8.62	Alkaline	Strongly_alkaline	57.7	1700.06	106.27	15.01	10.58	0.03	0.35	90	0	10	Sand	Coarse	0.2041	Semi_arid	2947	22.1	56	3658	61	534	0	107	_Closed_to_open_(>15%)_vegetation_(grassland,_shrubland,_woody_vegetation)_on_regularly_flooded_or_waterlogged_soil_-_Fresh,_brackish_or_saline_water	LC_17
BW57	22.65222222	-20.92416667	Botswana	8.15	Alkaline	Moderately_alkaline	227.99	2951.62	250.52	21.23	16	0.08	0.74	85	0	15	Loamy_sand	Coarse	0.1279	Arid	3042	21.9	56	4179	56	418	0	99	_Closed_to_open_(>15%)_grassland	LC_13
BW58	22.49833333	-21.29055556	Botswana	7	Neutral	Neutral	139.67	1397.76	154.82	15.5	10.8	0.08	1.11	89	0	11	Sand	Coarse	0.1315	Arid	2683	21.4	56	4244	49	419	0	98	_Closed_to_open_(>15%)_grassland	LC_13
BW59	22.00416667	-21.67277778	Botswana	6.83	Neutral	Neutral	43.54	462.39	48.23	11.76	3.77	0.03	0.35	94	0	6	Sand	Coarse	0.1352	Arid	2651	21.1	57	4412	42	419	0	97	_Closed_to_open_(>15%)_grassland	LC_13
BW60	21.65305556	-21.9125	Botswana	6.94	Neutral	Neutral	67.47	494.45	100.84	12.46	6.18	0.03	0.38	95	0	5	Sand	Coarse	0.1367	Arid	2596	20.7	58	4366	39	410	0	94	_Closed_to_open_(>15%)_grassland	LC_13
BW61	21.82555556	-22.44111111	Botswana	6.83	Neutral	Neutral	41.75	368.95	94.55	12.35	3.65	0.02	0.23	95	0	5	Sand	Coarse	0.1339	Arid	2461	20.8	57	4471	40	376	0	92	_Closed_to_open_(>15%)_grassland	LC_13
BW62	22.00444444	-22.79194444	Botswana	6.43	Acidic	Slightly_acid	44	262.81	71.08	13.49	6.1	0.02	0.23	95	0	5	Sand	Coarse	0.1319	Arid	2895	20.5	56	4609	35	372	1	89	_Closed_to_open_(>15%)_grassland	LC_13
BW63	22.32611111	-23.03361111	Botswana	7.15	Neutral	Neutral	51.55	546.76	131.46	15.19	6.13	0.03	0.25	92	0	8	Sand	Coarse	0.1321	Arid	2528	20.5	56	4608	36	370	1	90	_Closed_to_open_(>15%)_grassland	LC_13
BW64	22.53388889	-23.50916667	Botswana	5.76	Acidic	Moderately_acid	38.62	201.41	49.52	10	12.09	0.03	0.33	93	0	7	Sand	Coarse	0.1312	Arid	2878	20.3	56	4692	34	362	1	87	_Closed_to_open_(>15%)_grassland	LC_13
BW65	22.83277778	-23.84	Botswana	6.7	Neutral	Neutral	61.21	402.72	87.24	15.29	9.47	0.03	0.31	94	0	6	Sand	Coarse	0.1265	Arid	2477	20.2	55	4745	32	354	1	86	_Closed_to_open_(>15%)_grassland	LC_13
BW66	22.41972222	-23.97555556	Botswana	6.67	Neutral	Neutral	57.01	324.27	87.06	11.5	7.91	0.02	0.23	94	0	6	Sand	Coarse	0.1274	Arid	2768	20.3	55	4839	32	341	1	87	_Closed_to_open_(>15%)_grassland	LC_13
BW67	21.97361111	-24.10472222	Botswana	10.06	Alkaline	Very_strongly_alkaline	1677.33	4897.71	137.93	15400.64	37.07	0.04	0.65	70	0	30	Sandy_clay_loam	Mod_fine	0.1286	Arid	2040	20.4	54	4954	32	331	1	89	_Closed_to_open_(>15%)_grassland	LC_13
BW68	21.97388889	-24.10472222	Botswana	7.05	Neutral	Neutral	43.53	283.75	72.69	23.6	7.2	0.02	0.19	94	0	6	Sand	Coarse	0.1286	Arid	2040	20.4	54	4954	32	331	1	89	_Closed_to_open_(>15%)_grassland	LC_13
BW69	23.44277778	-24.47	Botswana	7.09	Neutral	Neutral	54.75	368.61	96.14	15.69	4.83	0.02	0.25	93	0	7	Sand	Coarse	0.1235	Arid	2385	20	55	4764	29	351	2	79	_Closed_to_open_(>15%)_grassland	LC_13
BW70	23.51916667	-24.85333333	Botswana	7.3	Neutral	Neutral	45.46	349.46	78.72	14.52	4.2	0.02	0.23	95	0	5	Sand	Coarse	0.1213	Arid	1973	20.2	55	4806	28	337	2	76	_Closed_to_open_(>15%)_grassland	LC_13
BW71	23.50388889	-25.28027778	Botswana	6.31	Acidic	Slightly_acid	50.64	252.16	81.95	14.33	5.85	0.02	0.25	92	0	8	Sand	Coarse	0.1227	Arid	1904	19.9	54	4945	24	333	2	77	_Closed_to_open_(>15%)_grassland	LC_13
BW72	23.09833333	-25.49861111	Botswana	6.29	Acidic	Slightly_acid	31.52	181.14	43.16	14.1	8.52	0.02	0.18	95	0	5	Sand	Coarse	0.1206	Arid	1667	19.9	54	5036	20	327	2	76	_Closed_to_open_(>15%)_grassland	LC_13
BW73	22.83972222	-25.83944444	Botswana	6.45	Acidic	Slightly_acid	32.79	302.51	51.62	11.69	14.2	0.02	0.25	94	0	6	Sand	Coarse	0.1221	Arid	1729	19.8	53	5191	16	337	2	76	_Closed_to_open_(>15%)_grassland	LC_13
BW74	22.485	-26.04861111	Botswana	7.02	Neutral	Neutral	15.93	226.86	61.98	9.74	9.76	0.01	0.2	93	0	7	Sand	Coarse	0.1155	Arid	1907	19.7	54	5291	12	333	2	78	_Closed_to_open_(>15%)_grassland	LC_13
BW75	22.52083333	-26.43277778	Botswana	8.5	Alkaline	Strongly_alkaline	59.39	781.23	120	14.73	14.27	0.02	0.25	96	0	4	Sand	Coarse	0.1224	Arid	1840	19.6	53	5338	14	296	1	78	_Closed_to_open_(>15%)_grassland	LC_13
BW76	22.17555556	-26.88277778	Botswana	6.92	Neutral	Neutral	26.24	139.1	34.35	4.9	12.58	0.01	0.16	95	0	5	Sand	Coarse	0.1154	Arid	1730	19.6	52	5444	14	222	0	79	_Closed_to_open_(>15%)_grassland	LC_13
BW77	21.79388889	-26.91555556	Botswana	8.84	Alkaline	Strongly_alkaline	72.23	2390.79	190.18	16.14	34.27	0.04	0.21	91	0	9	Sand	Coarse	0.1056	Arid	1513	19.6	52	5566	13	200	0	79	_Closed_to_open_(>15%)_grassland	LC_13
BW78	21.99472222	-26.91916667	Botswana	8.85	Alkaline	Strongly_alkaline	77.14	2654.81	154.34	21.36	24.69	0.01	0.18	95	0	5	Sand	Coarse	0.11	Arid	1938	19.7	52	5528	15	201	0	81	_Closed_to_open_(>15%)_grassland	LC_13
BW79	20.82083333	-26.91333333	Botswana	8.75	Alkaline	Strongly_alkaline	51.7	1534.02	157.47	20.73	17.35	0.01	0.19	95	0	5	Sand	Coarse	0.0812	Arid	1736	19.9	53	5671	13	178	1	75	_Closed_to_open_(>15%)_grassland	LC_13
BW80	24.01722222	-24.57416667	Botswana	6.18	Acidic	Slightly_acid	40.61	270.22	68.78	11.46	7.92	0.03	0.31	94	0	6	Sand	Coarse	0.1274	Arid	2575	20	55	4654	30	379	2	78	_Closed_to_open_(>15%)_grassland	LC_13
BW81	24.44277778	-24.67666667	Botswana	5.67	Acidic	Moderately_acid	32.43	168.44	69.42	10.98	4.5	0.02	0.21	93	0	7	Sand	Coarse	0.1332	Arid	2805	19.6	56	4497	30	421	2	76	_Closed_to_open_(>15%)_grassland	LC_13
BW82	25.0225	-24.79416667	Botswana	5.93	Acidic	Moderately_acid	41.24	189.97	52.33	10.89	4.55	0.03	0.31	94	0	6	Sand	Coarse	0.1685	Arid	2832	18.9	56	4271	29	491	2	78	_Mosaic_Vegetation_(grassland,_shrubland,_forest)_(50-70%)_/_Cropland_(20-50%)__	LC_3
BW83	25.29722222	-24.92305556	Botswana	5.58	Acidic	Strongly_acid	46.24	423.41	72.72	13.85	14.85	0.11	1.18	92	0	8	Sand	Coarse	0.1857	Arid	1961	19	56	4208	31	507	2	77	_Mosaic_Vegetation_(grassland,_shrubland,_forest)_(50-70%)_/_Cropland_(20-50%)__	LC_3
BW84	25.76916667	-24.70722222	Botswana	6.13	Acidic	Slightly_acid	118.39	714.51	248.83	19.26	9.41	0.04	0.33	78	2	20	Sandy_clay_loam	Mod_fine	0.1992	Arid	2618	19.6	54	4697	27	464	4	78	_Closed_to_open_(>15%)_shrubland_(<5m)	LC_12
BW85	25.70833333	-24.35944444	Botswana	5.94	Acidic	Moderately_acid	200.12	498.46	256.61	20.04	12.92	0.06	0.54	80	0	20	Sandy_clay_loam	Mod_fine	0.1942	Arid	2860	19.3	55	4539	27	483	3	77	_Closed_(>40%)_broadleaved_deciduous_forest_(>5m)	LC_5
BW86	25.84527778	-23.91416667	Botswana	5.61	Acidic	Moderately_acid	38.39	235.27	65.35	12.29	5.82	0.04	0.44	91	0	9	Sand	Coarse	0.1838	Arid	2946	19.5	55	4439	28	459	2	78	_Closed_to_open_(>15%)_grassland	LC_13
BW87	25.97111111	-23.48944444	Botswana	7	Neutral	Neutral	255.09	1949	447.53	22	3.81	0.08	0.84	75	5	21	Sandy_clay_loam	Mod_fine	0.1569	Arid	1926	20.1	56	4355	33	417	1	83	_Mosaic_Forest/Shrubland_(50-70%)_/_Grassland_(20-50%)	LC_10
BW88	26.39222222	-23.30222222	Botswana	7.84	Alkaline	Slightly_alkaline	260.28	2600.86	373.3	23.09	11.94	0.09	0.95	79	3	18	Sandy_clay_loam	Mod_fine	0.1646	Arid	2557	20.2	57	4286	34	417	1	86	_Mosaic_Vegetation_(grassland,_shrubland,_forest)_(50-70%)_/_Cropland_(20-50%)__	LC_3
BW89	26.60666667	-23.2125	Botswana	5.93	Acidic	Moderately_acid	140.94	393.2	127.43	21.21	13.24	0.05	0.55	84	0	16	Loamy_sand	Coarse	0.1837	Arid	2824	20.1	57	4226	33	435	1	86	_Closed_to_open_(>15%)_shrubland_(<5m)	LC_12
CI1	-4.0594	5.5187	Cote d_Ivoire	5.51	Acidic	Strongly_acid	49.98	394.08	89.4	30.83	67.06	0.17	1.25	67	21	12	Sandy_loam	Mod_coarse	1.08	Humid	4036	26.4	68	1116	209	1686	23	69	_Mosaic_Vegetation_(grassland,_shrubland,_forest)_(50-70%)_/_Cropland_(20-50%)__	LC_3
CI10	-3.1262	8.5676	Cote d_Ivoire	5.95	Acidic	Moderately_acid	22.97	219.09	42.44	20.87	10.27	0.04	0.58	85	7	8	Loamy_sand	Coarse	0.6109	Dry_sub_humid	3311	25.8	67	1368	185	1112	6	65	_Closed_to_open_(>15%)_shrubland_(<5m)	LC_12
CI11	-3.1806	8.9811	Cote d_Ivoire	6.6	Neutral	Neutral	56.55	958.9	220.86	23.41	8.11	0.09	1.29	77	10	13	Loamy_sand	Coarse	0.5719	Dry_sub_humid	3370	26.4	67	1379	186	1107	5	69	_Open_(15-40%)_broadleaved_deciduous_forest_(>5m)	LC_6
CI12	-3.0425	9.3612	Cote d_Ivoire	6.42	Acidic	Slightly_acid	39.52	550.63	78.96	21.09	9.43	0.04	0.55	87	5	8	Loamy_sand	Coarse	0.5055	Dry_sub_humid	2527	26.9	65	1467	187	1110	5	74	_Closed_to_open_(>15%)_shrubland_(<5m)	LC_12
CI13	-3.2955	9.6972	Cote d_Ivoire	6.58	Neutral	Neutral	32.32	645.95	103.93	17.76	11.48	0.03	0.74	84	8	8	Loamy_sand	Coarse	0.5058	Dry_sub_humid	3021	27.1	66	1520	188	1121	3	78	_Closed_to_open_(>15%)_shrubland_(<5m)	LC_12
CI14	-5.4114	10.0818	Cote d_Ivoire	6.44	Acidic	Slightly_acid	59.53	1230.17	175.33	22.11	14.58	0.1	1.43	81	7	12	Loamy_sand	Coarse	0.5514	Dry_sub_humid	2578	26.7	64	1503	172	1172	3	92	_Mosaic_Cropland_(50-70%)_/_Vegetation_(grassland,_shrubland,_forest)_(20-50%)	LC_2
CI15	-5.3672	10.067	Cote d_Ivoire	6.6	Neutral	Neutral	47.17	404	88.05	21.83	5.57	0.06	0.82	79	7	14	Loamy_sand	Coarse	0.5804	Dry_sub_humid	2203	26.8	64	1478	173	1162	3	92	_Mosaic_Cropland_(50-70%)_/_Vegetation_(grassland,_shrubland,_forest)_(20-50%)	LC_2
CI16	-5.4588	9.5186	Cote d_Ivoire	5.94	Acidic	Moderately_acid	41.57	226.34	81.47	20.59	10.2	0.04	0.43	64	12	24	Sandy_clay_loam	Mod_fine	0.5663	Dry_sub_humid	2755	26.5	63	1397	177	1264	5	81	_Closed_to_open_(>15%)_shrubland_(<5m)	LC_12
CI17	-5.5894	9.2197	Cote d_Ivoire	6.02	Acidic	Moderately_acid	24.51	254.82	88.87	20.26	5.27	0.05	0.62	78	10	12	Loamy_sand	Coarse	0.5631	Dry_sub_humid	3316	26.6	64	1319	185	1222	7	78	_Open_(15-40%)_broadleaved_deciduous_forest_(>5m)	LC_6
CI18	-5.3689	8.8701	Cote d_Ivoire	5.84	Acidic	Moderately_acid	84.16	819.74	155.14	21.12	16.37	0.08	1.15	80	7	12	Loamy_sand	Coarse	0.5688	Dry_sub_humid	2969	26.4	68	1230	187	1115	6	74	_Open_(15-40%)_broadleaved_deciduous_forest_(>5m)	LC_6
CI19	-5.1942	8.4903	Cote d_Ivoire	5.48	Acidic	Strongly_acid	34.66	1043.18	247.82	22.09	10.88	0.19	1.82	44	36	20	Loam	Medium	0.5855	Dry_sub_humid	2932	26.6	71	1169	192	1087	8	68	_Closed_to_open_(>15%)_shrubland_(<5m)	LC_12
CI2	-3.9401	5.9138	Cote d_Ivoire	5.53	Acidic	Strongly_acid	30.61	520.95	94.6	19.39	3.14	0.14	1.49	56	24	19	Sandy_loam	Mod_coarse	0.919	Humid	4143	26.6	71	1115	210	1487	21	57	_Mosaic_Vegetation_(grassland,_shrubland,_forest)_(50-70%)_/_Cropland_(20-50%)__	LC_3
CI20	-5.0837	8.0939	Cote d_Ivoire	5.95	Acidic	Moderately_acid	30.35	359.7	104.7	19.8	7.27	0.07	0.74	72	14	14	Loamy_sand	Coarse	0.6032	Dry_sub_humid	2544	26.9	75	1087	200	1081	11	62	_Closed_to_open_(>15%)_shrubland_(<5m)	LC_12
CI21	-5.0273	7.6372	Cote d_Ivoire	6.68	Neutral	Neutral	66.64	1147.87	125.95	21.67	21.9	0.12	1.5	75	10	14	Loamy_sand	Coarse	0.6483	Dry_sub_humid	3316	26.5	78	1049	201	1121	11	59	_Closed_to_open_(>15%)_broadleaved_evergreen_and/or_semi-deciduous_forest_(>5m)	LC_4
CI22	-5.1633	7.2165	Cote d_Ivoire	5.94	Acidic	Moderately_acid	25.07	352.7	137.78	20.74	7.19	0.09	1.01	72	7	20	Sandy_clay_loam	Mod_fine	0.6627	Humid	3858	26.4	74	1068	197	1048	10	61	_Closed_to_open_(>15%)_broadleaved_evergreen_and/or_semi-deciduous_forest_(>5m)	LC_4
CI23	-5.3033	6.7859	Cote d_Ivoire	6.09	Acidic	Moderately_acid	93.77	827.43	164.51	22.57	5.02	0.11	1.18	66	10	24	Sandy_clay_loam	Mod_fine	0.7268	Humid	2592	25.9	70	1128	191	1128	13	58	_Mosaic_Vegetation_(grassland,_shrubland,_forest)_(50-70%)_/_Cropland_(20-50%)__	LC_3
CI24	-5.6839	6.6441	Cote d_Ivoire	6.93	Neutral	Neutral	208.75	1723.52	227.26	28.18	13.59	0.18	1.43	58	10	32	Sandy_clay_loam	Mod_fine	0.7708	Humid	4111	26.2	73	990	200	1269	22	52	_Mosaic_Vegetation_(grassland,_shrubland,_forest)_(50-70%)_/_Cropland_(20-50%)__	LC_3
CI25	-5.962	6.4231	Cote d_Ivoire	4.94	Acidic	Very_strongly_acid	52.99	822.26	213.62	24.63	5.5	0.26	2.04	65	14	21	Sandy_clay_loam	Mod_fine	0.8087	Humid	4188	25.9	73	934	201	1323	23	49	_Mosaic_Vegetation_(grassland,_shrubland,_forest)_(50-70%)_/_Cropland_(20-50%)__	LC_3
CI26	-6.0419	6.0869	Cote d_Ivoire	5.76	Acidic	Moderately_acid	57.85	1015.92	171.33	23.52	4.11	0.2	1.58	71	7	22	Sandy_clay_loam	Mod_fine	0.834	Humid	3155	25.9	73	932	206	1410	26	47	_Mosaic_Vegetation_(grassland,_shrubland,_forest)_(50-70%)_/_Cropland_(20-50%)__	LC_3
CI27	-6.0419	6.087	Cote d_Ivoire	5.68	Acidic	Moderately_acid	12.39	176.16	51.13	20.25	1.59	0.08	0.94	76	5	19	Sandy_clay_loam	Mod_fine	0.834	Humid	3155	25.9	73	932	206	1410	26	47	_Mosaic_Vegetation_(grassland,_shrubland,_forest)_(50-70%)_/_Cropland_(20-50%)__	LC_3
CI28	-6.5454	5.2202	Cote d_Ivoire	5.07	Acidic	Very_strongly_acid	22.84	243.72	57.85	16.73	1.65	0.1	1.17	79	4	17	Loamy_sand	Coarse	0.9693	Humid	3937	25.8	75	902	213	1464	26	65	_Mosaic_Vegetation_(grassland,_shrubland,_forest)_(50-70%)_/_Cropland_(20-50%)__	LC_3
CI29	-6.6079	5.6179	Cote d_Ivoire	6.63	Neutral	Neutral	22.17	629.66	78	16.76	31.59	0.06	0.75	87	5	8	Loamy_sand	Coarse	0.8965	Humid	3074	26.2	76	905	214	1493	28	48	_Mosaic_Vegetation_(grassland,_shrubland,_forest)_(50-70%)_/_Cropland_(20-50%)__	LC_3
CI3	-3.8309	6.313	Cote d_Ivoire	5.51	Acidic	Strongly_acid	120.34	1210	203.54	27.19	7.35	0.23	1.86	39	34	27	Loam	Medium	0.8378	Humid	4401	26.5	73	1060	209	1364	16	58	_Mosaic_Vegetation_(grassland,_shrubland,_forest)_(50-70%)_/_Cropland_(20-50%)__	LC_3
CI30	-6.608	5.6179	Cote d_Ivoire	5.51	Acidic	Strongly_acid	19.62	288.07	78.74	15.05	8.76	0.1	1.21	83	3	14	Loamy_sand	Coarse	0.8965	Humid	3074	26.2	76	905	214	1493	28	48	_Mosaic_Vegetation_(grassland,_shrubland,_forest)_(50-70%)_/_Cropland_(20-50%)__	LC_3
CI31	-6.5295	6.4004	Cote d_Ivoire	5.26	Acidic	Strongly_acid	18.84	732.25	113.41	14.96	5.54	0.15	1.42	65	21	13	Sandy_loam	Mod_coarse	0.8188	Humid	4146	25.9	73	924	200	1393	19	51	_Mosaic_Vegetation_(grassland,_shrubland,_forest)_(50-70%)_/_Cropland_(20-50%)__	LC_3
CI32	-6.4661	6.7943	Cote d_Ivoire	6.24	Acidic	Slightly_acid	88.55	1171.8	216.61	20.35	6.35	0.17	1.64	69	7	25	Sandy_clay_loam	Mod_fine	0.773	Humid	4039	25.7	71	1010	192	1327	15	54	_Mosaic_Vegetation_(grassland,_shrubland,_forest)_(50-70%)_/_Cropland_(20-50%)__	LC_3
CI33	-6.4824	7.3327	Cote d_Ivoire	6.58	Neutral	Neutral	194.28	1966.35	267.09	22.64	12.17	0.25	1.67	53	18	29	Sandy_clay_loam	Mod_fine	0.7376	Humid	3053	25.8	72	1082	187	1249	14	59	_Mosaic_Vegetation_(grassland,_shrubland,_forest)_(50-70%)_/_Cropland_(20-50%)__	LC_3
CI34	-6.5805	7.7366	Cote d_Ivoire	6.6	Neutral	Neutral	168.14	1287.06	240.84	24.41	14.02	0.15	1.63	70	4	26	Sandy_clay_loam	Mod_fine	0.7263	Humid	3126	25.5	71	1056	180	1250	15	60	_Closed_to_open_(>15%)_shrubland_(<5m)	LC_12
CI35	-6.6237	8.1386	Cote d_Ivoire	6.21	Acidic	Slightly_acid	69.1	713	171.34	17.77	13.52	0.09	0.78	80	4	16	Loamy_sand	Coarse	0.7001	Humid	3217	25.9	69	1121	179	1255	11	65	_Closed_to_open_(>15%)_shrubland_(<5m)	LC_12
CI36	-6.6137	8.573	Cote d_Ivoire	6.1	Acidic	Slightly_acid	57.59	800.07	114.7	17.65	13.52	0.07	0.9	77	4	19	Sandy_clay_loam	Mod_fine	0.689	Humid	2250	26	67	1153	175	1300	7	72	_Open_(15-40%)_broadleaved_deciduous_forest_(>5m)	LC_6
CI37	-6.9143	6.7522	Cote d_Ivoire	5.66	Acidic	Moderately_acid	27.25	261.81	70.31	15.9	4.17	0.08	0.73	78	3	19	Sandy_clay_loam	Mod_fine	0.8484	Humid	2866	25.7	71	969	188	1410	15	58	_Mosaic_Vegetation_(grassland,_shrubland,_forest)_(50-70%)_/_Cropland_(20-50%)__	LC_3
CI38	-7.3752	6.7546	Cote d_Ivoire	5.43	Acidic	Strongly_acid	68.12	730.92	127.22	18.28	11.08	0.19	1.38	75	4	21	Sandy_clay_loam	Mod_fine	0.9381	Humid	3555	25.5	71	1008	183	1517	15	63	_Mosaic_Vegetation_(grassland,_shrubland,_forest)_(50-70%)_/_Cropland_(20-50%)__	LC_3
CI39	-7.5568	7.1254	Cote d_Ivoire	5.58	Acidic	Strongly_acid	69.08	578.64	124.4	19.74	2.05	0.19	1.26	58	11	30	Sandy_clay_loam	Mod_fine	0.9906	Humid	4039	25.4	67	958	169	1610	13	64	_Closed_to_open_(>15%)_broadleaved_evergreen_and/or_semi-deciduous_forest_(>5m)	LC_4
CI4	-3.7001	6.6582	Cote d_Ivoire	6.1	Acidic	Slightly_acid	52.92	501.28	89.79	18.37	11.4	0.08	0.69	82	8	10	Loamy_sand	Coarse	0.7754	Humid	3308	26.9	71	1060	208	1267	11	60	_Mosaic_Vegetation_(grassland,_shrubland,_forest)_(50-70%)_/_Cropland_(20-50%)__	LC_3
CI40	-7.6207	7.5106	Cote d_Ivoire	5.65	Acidic	Moderately_acid	76.98	379.55	136.91	17.82	3.54	0.16	1.22	55	14	31	Sandy_clay_loam	Mod_fine	1.002	Humid	4009	24.1	65	968	151	1675	14	65	_Closed_to_open_(>15%)_broadleaved_evergreen_and/or_semi-deciduous_forest_(>5m)	LC_4
CI41	-7.6694	7.8807	Cote d_Ivoire	5.88	Acidic	Moderately_acid	30.2	548.06	99.57	20.63	5.14	0.11	1.15	70	7	23	Sandy_clay_loam	Mod_fine	0.8722	Humid	2929	24.6	67	978	156	1532	11	68	_Open_(15-40%)_broadleaved_deciduous_forest_(>5m)	LC_6
CI42	-7.662	8.3026	Cote d_Ivoire	6.07	Acidic	Moderately_acid	88.34	1379.08	234.68	23.11	9.87	0.15	1.15	55	12	33	Sandy_clay_loam	Mod_fine	0.7926	Humid	2477	24.8	69	1026	162	1360	7	71	_Open_(15-40%)_broadleaved_deciduous_forest_(>5m)	LC_6
CI43	-7.4689	8.6645	Cote d_Ivoire	6.2	Acidic	Slightly_acid	77.37	810.6	141.42	18.12	26.42	0.09	1.14	72	8	20	Sandy_clay_loam	Mod_fine	0.7406	Humid	2326	25.6	66	1125	164	1369	5	74	_Open_(15-40%)_broadleaved_deciduous_forest_(>5m)	LC_6
CI44	-7.5891	9.0615	Cote d_Ivoire	5.68	Acidic	Moderately_acid	22.8	337.95	85.39	12.54	22.7	0.04	0.61	85	3	12	Loamy_sand	Coarse	0.7825	Humid	2723	25.4	64	1271	154	1448	4	81	_Closed_to_open_(>15%)_shrubland_(<5m)	LC_12
CI45	-7.5628	9.4731	Cote d_Ivoire	6.42	Acidic	Slightly_acid	48.96	417.51	111.25	17.2	8.33	0.05	0.91	74	8	18	Sandy_clay_loam	Mod_fine	0.7471	Humid	2738	25.7	61	1482	143	1482	4	87	_Open_(15-40%)_broadleaved_deciduous_forest_(>5m)	LC_6
CI5	-3.4232	7.1151	Cote d_Ivoire	7.78	Alkaline	Slightly_alkaline	16.7	1412.86	217.37	105.91	28.13	0.13	1.52	63	27	10	Sandy_loam	Mod_coarse	0.7363	Humid	4906	26.7	70	1131	205	1175	7	61	_Closed_to_open_(>15%)_broadleaved_evergreen_and/or_semi-deciduous_forest_(>5m)	LC_4
CI6	-3.213	7.2709	Cote d_Ivoire	7.02	Neutral	Neutral	118.32	2388.17	477.96	27.55	133.54	0.26	2.18	57	25	18	Sandy_loam	Mod_coarse	0.7287	Humid	3774	26.8	68	1146	204	1152	6	62	_Closed_to_open_(>15%)_broadleaved_evergreen_and/or_semi-deciduous_forest_(>5m)	LC_4
CI7	-3.2176	7.6655	Cote d_Ivoire	6.44	Acidic	Slightly_acid	176.85	2086.83	292.99	29.01	34.44	0.24	1.81	37	36	27	Loam	Medium	0.6745	Humid	4302	27	68	1238	205	1091	5	61	_Mosaic_Vegetation_(grassland,_shrubland,_forest)_(50-70%)_/_Cropland_(20-50%)__	LC_3
CI8	-2.9493	7.9394	Cote d_Ivoire	6.85	Neutral	Neutral	176.74	3728.39	553.46	37.26	32.41	0.26	2.5	34	39	26	Loam	Medium	0.6648	Humid	3261	26.4	66	1310	197	1113	7	61	_Closed_to_open_(>15%)_broadleaved_evergreen_and/or_semi-deciduous_forest_(>5m)	LC_4
CI9	-2.9668	8.2239	Cote d_Ivoire	5.78	Acidic	Moderately_acid	33.09	1041.09	217.84	27.4	7.39	0.14	1.81	53	31	15	Sandy_loam	Mod_coarse	0.6409	Dry_sub_humid	2628	25.9	66	1355	190	1119	7	62	_Mosaic_Grassland_(50-70%)_/_Forest/Shrubland_(20-50%)	LC_11
K1	38.651817	-3.769717	Kenya	7.18	Neutral	Neutral	179.51	2046.03	275.97	15.55	9.92	0.08	0.82	74	6	20	Sandy_clay_loam	Mod_fine	0.1526	Arid	1542	23.2542	78	1204	170	728	2	113	_Open_(15-40%)_broadleaved_deciduous_forest_(>5m)	LC_6
K10	38.29435	-3.405267	Kenya	6.41	Acidic	Slightly_acid	264.21	1964.41	388.99	16.06	10.71	0.32	2.67	62	19	20	Sandy_loam	Mod_coarse	0.1405	Arid	1483	17.5417004	80	1099	175	1195	1	114	_Mosaic_Forest/Shrubland_(50-70%)_/_Grassland_(20-50%)	LC_10
K11	38.2095	-3.542167	Kenya	8.02	Alkaline	Moderately_alkaline	344.71	3166.04	210.04	15.98	160.77	0.12	1.01	79	7	14	Loamy_sand	Coarse	0.1494	Arid	1193	22.2542	80	1098	168	682	1	112	_Mosaic_Forest/Shrubland_(50-70%)_/_Grassland_(20-50%)	LC_10
K13	37.712383	-3.311417	Kenya	7.52	Alkaline	Slightly_alkaline	979.26	6185.59	660.74	35.69	46.27	0.36	2.59	61	26	13	Sandy_loam	Mod_coarse	0.1245	Arid	831	22.5042	81	977	159	688	2	104	Bare_areas	LC_19
K14	37.77222222	-3.562472	Kenya	7.21	Neutral	Neutral	219.91	1437.05	202.9	52.92	66.78	0.1	0.62	63	20	16	Sandy_loam	Mod_coarse	0.11	Arid	990	23.5	82	946	174	521	1	105	Bare_areas	LC_19
K15	36.60735	-1.09615	Kenya	6.33	Acidic	Slightly_acid	369.29	2169.72	285.8	16.52	1.36	0.3	2.61	32	47	20	Loam	Medium	0.3791	Semi_arid	2289	15.4958	86	898	97	1214	17	65	_Mosaic_Cropland_(50-70%)_/_Vegetation_(grassland,_shrubland,_forest)_(20-50%)	LC_2
K16	36.49444444	-0.868133	Kenya	6.57	Neutral	Neutral	247.35	694.86	88.52	23.12	2.7	0.09	0.67	77	11	12	Loamy_sand	Coarse	0.421	Semi_arid	1245	14.9624996	86	706	86	910	15	50	_Mosaic_Forest/Shrubland_(50-70%)_/_Grassland_(20-50%)	LC_10
K17	36.429317	-0.7425	Kenya	6.6	Neutral	Neutral	1388.36	3390.42	483.42	168.84	83.1	0.46	2.89	42	36	23	Loam	Medium	0.4104	Semi_arid	2239	17.0042	83	734	74	647	14	50	_Closed_to_open_(>15%)_shrubland_(<5m)	LC_12
K18	35.654233	-0.167967	Kenya	6.23	Acidic	Slightly_acid	417.13	2663.24	388.52	36.35	1.45	0.28	2.2	40	41	20	Loam	Medium	0.8099	Humid	2861	14.6083002	86	562	83	1151	32	46	_Closed_to_open_(>15%)_broadleaved_evergreen_and/or_semi-deciduous_forest_(>5m)	LC_4
K19	35.151639	-0.260361	Kenya	6.77	Neutral	Neutral	582.5	2799.61	374.11	125.88	2.05	0.17	1.63	52	24	23	Sandy_clay_loam	Mod_fine	0.8656	Humid	3313	20.5874996	85	860	85	1484	47	41	_Mosaic_Cropland_(50-70%)_/_Vegetation_(grassland,_shrubland,_forest)_(20-50%)	LC_2
K21	34.77333333	0.29541667	Kenya	5.96	Acidic	Moderately_acid	86.17	3786.66	444.58	16.23	1.81	0.48	4.51	65	20	15	Sandy_loam	Mod_coarse	1.0912	Humid	4623	19.9750004	87	705	109	1973	63	37	_Mosaic_Vegetation_(grassland,_shrubland,_forest)_(50-70%)_/_Cropland_(20-50%)__	LC_3
K22	34.49083333	0.37833333	Kenya	6.78	Neutral	Neutral	54.64	1347.59	106.03	27.14	13.6	0.08	0.69	66	13	20	Sandy_clay_loam	Mod_fine	0.9448	Humid	4004	21.7667007	86	627	140	1794	49	40	_Mosaic_Cropland_(50-70%)_/_Vegetation_(grassland,_shrubland,_forest)_(20-50%)	LC_2
K23	36.74675	-0.714883	Kenya	3.42	Acidic	Extremely_acid	37.19	37.55	13.06	14.17	11.28	0.92	6.57	84	1	15	Loamy_sand	Coarse	0.4775	Semi_arid	1950	11.4499998	86	753	98	1575	14	83	_Closed_to_open_(>15%)_shrubland_(<5m)	LC_12
K25	35.00388889	0.99544444	Kenya	6.43	Acidic	Slightly_acid	183.33	2840.85	222.14	16.55	8.55	0.29	2.47	77	9	14	Loamy_sand	Coarse	0.6521	Humid	2447	18.1875	88	734	93	1146	22	49	_Closed_to_open_(>15%)_shrubland_(<5m)	LC_12
K26	35.17361111	0.63227778	Kenya	5.72	Acidic	Moderately_acid	199.48	713.91	208.94	16.8	1.81	0.17	1.66	50	29	21	Loam	Medium	0.6107	Dry_sub_humid	2713	17.7999992	86	773	83	1078	28	54	_Mosaic_Cropland_(50-70%)_/_Vegetation_(grassland,_shrubland,_forest)_(20-50%)	LC_2
K27	35.46694444	0.14122222	Kenya	6.14	Acidic	Slightly_acid	595.09	2558.76	601.46	22.9	3.12	0.43	2.73	42	36	23	Loam	Medium	0.8684	Humid	3440	14.5042	84	684	74	1251	40	48	_Closed_to_open_(>15%)_broadleaved_evergreen_and/or_semi-deciduous_forest_(>5m)	LC_4
K28	35.535	0	Kenya	5.01	Acidic	Very_strongly_acid	302.23	1391.56	234.84	17.37	6.3	0.45	3.09	34	42	24	Loam	Medium	0.967	Humid	2665	13.5166998	80	808	69	1325	43	47	_Closed_to_open_(>15%)_shrubland_(<5m)	LC_12
K29	36.642483	-1.213917	Kenya	6.57	Neutral	Neutral	373.58	3455.18	360.76	17.15	0.7	0.39	2.77	39	43	18	Loam	Medium	0.2807	Semi_arid	1554	16.9041996	86	876	112	1002	12	73	_Mosaic_Forest/Shrubland_(50-70%)_/_Grassland_(20-50%)	LC_10
K3	38.641333	-3.4535	Kenya	7.37	Neutral	Neutral	129.46	2099.54	226.86	16.81	53.96	0.18	1.35	83	6	10	Loamy_sand	Coarse	0.2064	Semi_arid	1966	23.6583004	76	1475	161	771	7	115	_Open_(15-40%)_broadleaved_deciduous_forest_(>5m)	LC_6
K31	37.59444444	-0.809806	Kenya	7.83	Alkaline	Slightly_alkaline	230.9	4759.73	199.3	19.16	3.88	0.16	1.3	64	21	16	Sandy_loam	Mod_coarse	0.2434	Semi_arid	1741	21.7667007	88	649	142	781	4	99	_Mosaic_Cropland_(50-70%)_/_Vegetation_(grassland,_shrubland,_forest)_(20-50%)	LC_2
K33	36.58583333	-0.100917	Kenya	6.84	Neutral	Neutral	765.44	6116.35	1289.5	25.21	9.94	1.01	8.31	63	17	20	Sandy_loam	Mod_coarse	0.4765	Semi_arid	2228	15.25	81	526	70	823	30	39	_Mosaic_Cropland_(50-70%)_/_Vegetation_(grassland,_shrubland,_forest)_(20-50%)	LC_2
K34	36.842717	-0.462333	Kenya	4.39	Acidic	Extremely_acid	151.56	947.68	178.62	19.28	16.67	0.87	6.29	75	5	20	Sandy_clay_loam	Mod_fine	0.5912	Dry_sub_humid	1725	14.3667002	86	616	99	1452	22	84	_Mosaic_Forest/Shrubland_(50-70%)_/_Grassland_(20-50%)	LC_10
K35	37.311367	-0.408167	Kenya	4.61	Acidic	Very_strongly_acid	131.36	634.61	182.79	21.51	10.02	0.8	5.5	63	22	15	Sandy_loam	Mod_coarse	0.2616	Semi_arid	1527	16.8458004	88	734	143	1807	6	90	_Mosaic_Vegetation_(grassland,_shrubland,_forest)_(50-70%)_/_Cropland_(20-50%)__	LC_3
K36	37.48215	-0.3472	Kenya	3.92	Acidic	Extremely_acid	152.53	544.04	108.33	18.77	9.57	0.79	5.62	72	7	21	Sandy_clay_loam	Mod_fine	0.2527	Semi_arid	1167	16.5667	86	705	144	2011	3	102	_Mosaic_Forest/Shrubland_(50-70%)_/_Grassland_(20-50%)	LC_10
K37	37.6	-0.313333	Kenya	5.2	Acidic	Strongly_acid	218.29	1436.91	575.97	10.2	4.67	0.6	3.07	68	11	21	Sandy_clay_loam	Mod_fine	0.4011	Semi_arid	1787	18.1333008	87	763	132	1737	7	93	_Mosaic_Forest/Shrubland_(50-70%)_/_Grassland_(20-50%)	LC_10
K38	37.44615	-0.161383	Kenya	5.37	Acidic	Strongly_acid	280.9	1990.04	171.52	16.27	25.99	0.54	3.48	67	15	18	Sandy_loam	Mod_coarse	0.3644	Semi_arid	1622	11.0375004	87	734	138	1466	6	95	_Mosaic_Forest/Shrubland_(50-70%)_/_Grassland_(20-50%)	LC_10
K39	37.452617	-0.172167	Kenya	5.29	Acidic	Strongly_acid	161.91	1211.64	119.62	27.88	4.42	0.8	6.42	58	20	21	Sandy_clay_loam	Mod_fine	0.8349	Humid	1930	11.4208002	85	744	96	1492	17	89	_Mosaic_Forest/Shrubland_(50-70%)_/_Grassland_(20-50%)	LC_10
K4	38.72775	-3.637556	Kenya	8.45	Alkaline	Moderately_alkaline	188.24	2890.14	299.36	14.83	12.08	0.07	0.48	83	1	16	Sandy_loam	Mod_coarse	0.3362	Semi_arid	2090	22.3458004	75	1582	117	819	10	97	_Mosaic_Cropland_(50-70%)_/_Vegetation_(grassland,_shrubland,_forest)_(20-50%)	LC_2
K40	37.4943	-0.204167	Kenya	3.9	Acidic	Extremely_acid	68.01	48.52	9.65	16.05	8.02	1.11	6.43	46	30	24	Loam	Medium	0.5241	Dry_sub_humid	1703	13.9875002	87	726	124	1571	8	96	_Mosaic_Forest/Shrubland_(50-70%)_/_Grassland_(20-50%)	LC_10
K42	37.255667	-0.002667	Kenya	6.69	Neutral	Neutral	490.32	4391.77	859.61	24.73	1.43	0.77	6.13	18	68	14	Silty_loam	Medium	1.0037	Humid	2968	12.3374996	79	720	48	1285	35	60	_Mosaic_Grassland_(50-70%)_/_Forest/Shrubland_(20-50%)	LC_11
K45	39.72055	-4.017133	Kenya	7.53	Alkaline	Slightly_alkaline	119.6	16158.25	807.14	100.65	15.63	0.78	6.42	65	18	17	Sandy_loam	Mod_coarse	0.1413	Arid	1651	26.2332993	78	1094	193	928	1	111	_Mosaic_Vegetation_(grassland,_shrubland,_forest)_(50-70%)_/_Cropland_(20-50%)__	LC_3
K46	39.69472222	-3.793139	Kenya	7.97	Alkaline	Moderately_alkaline	198	4173.53	255.87	28.58	42.64	0.16	1.18	64	12	24	Sandy_clay_loam	Mod_fine	0.1518	Arid	1739	25.1917	77	1322	171	1132	1	111	_Mosaic_Forest/Shrubland_(50-70%)_/_Grassland_(20-50%)	LC_10
K47	40.124833	-3.149361	Kenya	8.52	Alkaline	Strongly_alkaline	54.64	3936.73	139.9	30.13	20.95	0.03	0.21	86	2	12	Loamy_sand	Coarse	0.1498	Arid	1677	25.0457993	78	1169	188	1074	2	107	_Sparse_(>15%)_vegetation_(woody_vegetation,_shrubs,_grassland)	LC_14
K48	39.98985	-3.300183	Kenya	6.83	Neutral	Neutral	37.29	419.05	64.92	9.72	23.22	0.05	0.43	91	0	9	Sand	Coarse	0.1491	Arid	1609	24.8708	78	1202	185	869	1	109	_Mosaic_Forest/Shrubland_(50-70%)_/_Grassland_(20-50%)	LC_10
K49	39.441367	-4.222367	Kenya	6.57	Neutral	Neutral	11.12	476.54	132.3	14.53	1.76	0.08	0.81	84	0	16	Loamy_sand	Coarse	0.1428	Arid	1455	23.7542	78	1141	185	1098	1	113	_Sparse_(>15%)_vegetation_(woody_vegetation,_shrubs,_grassland)	LC_14
K5	38.34555556	-3.48595	Kenya	4.09	Acidic	Extremely_acid	40.41	650.42	112.48	16.99	17.58	0.64	5.37	83	2	15	Loamy_sand	Coarse	0.1521	Arid	1190	19.0750008	80	1054	169	1130	1	111	_Mosaic_Forest/Shrubland_(50-70%)_/_Grassland_(20-50%)	LC_10
K50	39.44694444	-4.176944	Kenya	6.15	Acidic	Slightly_acid	23.89	1392.37	238.31	22.52	3.44	0.21	2.42	88	2	10	Loamy_sand	Coarse	0.1391	Arid	1280	23.6583004	78	1084	187	1097	1	114	_Mosaic_Forest/Shrubland_(50-70%)_/_Grassland_(20-50%)	LC_10
K51	39.435767	-4.1381	Kenya	6.74	Neutral	Neutral	182.19	1347.02	202.63	27.79	11.67	0.12	1.11	77	13	10	Loamy_sand	Coarse	0.1407	Arid	1382	25.4291992	78	1126	186	1080	1	114	_Mosaic_Forest/Shrubland_(50-70%)_/_Grassland_(20-50%)	LC_10
K52	39.546967	-4.393383	Kenya	7.44	Alkaline	Slightly_alkaline	76.23	17210.8	489.58	98.58	41.92	0.75	6.2	77	8	15	Loamy_sand	Coarse	0.1431	Arid	1639	26.2332993	78	1181	180	1177	1	113	_Mosaic_Forest/Shrubland_(50-70%)_/_Grassland_(20-50%)	LC_10
K53	39.5113	-4.429517	Kenya	7.24	Neutral	Neutral	208.25	937.1	609.29	1162.57	27.06	0.13	1.27	92	1	7	Sand	Coarse	0.1565	Arid	1745	26.3416996	77	1281	172	1169	1	113	_Mosaic_Vegetation_(grassland,_shrubland,_forest)_(50-70%)_/_Cropland_(20-50%)__	LC_3
K54	39.376517	-4.658833	Kenya	7.17	Neutral	Neutral	136.55	6293.92	759.67	110.68	4.86	1.04	5.42	80	7	13	Loamy_sand	Coarse	0.1427	Arid	1591	26.1875	77	1335	174	1140	0	115	_Mosaic_Vegetation_(grassland,_shrubland,_forest)_(50-70%)_/_Cropland_(20-50%)__	LC_3
K55	39.373183	-4.645033	Kenya	7.47	Alkaline	Slightly_alkaline	273.21	11104.67	619.73	52.89	10.24	1.01	5.63	58	24	18	Sandy_loam	Mod_coarse	0.1505	Arid	1168	26.2416992	78	1202	167	1099	2	112	_Mosaic_Forest/Shrubland_(50-70%)_/_Grassland_(20-50%)	LC_10
K56	38.825233	-3.353617	Kenya	7.52	Alkaline	Slightly_alkaline	603.72	5485.77	856.06	96	54.86	0.16	0.9	19	24	57	Clay	Fine	0.1446	Arid	1320	24.5874996	79	1127	180	841	1	117	_Mosaic_Vegetation_(grassland,_shrubland,_forest)_(50-70%)_/_Cropland_(20-50%)__	LC_3
K57	38.131333	-2.7473	Kenya	6.65	Neutral	Neutral	249.35	894.03	178.37	18.72	49.91	0.07	0.93	83	1	16	Loamy_sand	Coarse	0.1439	Arid	1033	22.7292004	78	1213	170	654	2	113	_Closed_to_open_(>15%)_grassland	LC_13
K58	38.023	-2.984233	Kenya	7.94	Alkaline	Moderately_alkaline	2032.35	14594.62	2318.23	462.39	152.45	0.77	5.29	69	14	17	Sandy_loam	Mod_coarse	0.1349	Arid	870	23.1292	79	1156	171	502	2	111	_Bare_areas	LC_19
K59	38.0051	-2.917233	Kenya	8.45	Alkaline	Moderately_alkaline	203.83	3823.79	272.14	78.15	30.76	0.03	0.28	88	4	8	Loamy_sand	Coarse	0.1211	Arid	919	22.8833008	79	1120	172	533	2	112	_Closed_to_open_(>15%)_grassland	LC_13
K6	38.346389	-3.482061	Kenya	4.53	Acidic	Very_strongly_acid	32.9	522.28	75.52	15.26	9.63	0.5	3.13	72	14	14	Loamy_sand	Coarse	0.1822	Arid	1471	18.7999992	77	1362	158	1148	5	114	_Mosaic_Forest/Shrubland_(50-70%)_/_Grassland_(20-50%)	LC_10
K60	38.064617	-2.902567	Kenya	7.52	Alkaline	Slightly_alkaline	358.16	2235.18	211.78	22.82	60.4	0.1	0.93	71	9	20	Sandy_clay_loam	Mod_fine	0.1385	Arid	698	22.7292004	78	1190	170	610	2	112	_Closed_to_open_(>15%)_grassland	LC_13
K61	36.788367	-1.349383	Kenya	7.09	Neutral	Neutral	580.48	4599.45	715.97	27.25	4.54	0.71	4.13	46	38	16	Loam	Medium	0.2477	Semi_arid	1890	19.2749996	86	895	114	892	12	76	_Mosaic_Forest/Shrubland_(50-70%)_/_Grassland_(20-50%)	LC_10
K62	36.771133	-1.368283	Kenya	6.91	Neutral	Neutral	442.05	4311.88	708.28	81.87	3.21	0.49	3.14	36	42	22	Loam	Medium	0.273	Semi_arid	1519	19.0916996	86	846	116	923	10	76	_Mosaic_Forest/Shrubland_(50-70%)_/_Grassland_(20-50%)	LC_10
K63	36.797983	-0.750333	Kenya	4.25	Acidic	Extremely_acid	80.71	814.59	103.61	18.74	17.58	1.02	6.54	60	6	34	Sandy_clay_loam	Mod_fine	0.4005	Semi_arid	1628	13.6042004	87	673	124	1936	14	84	_Mosaic_Vegetation_(grassland,_shrubland,_forest)_(50-70%)_/_Cropland_(20-50%)__	LC_3
K64	36.900967	-1.411133	Kenya	6.44	Acidic	Slightly_acid	620.92	3118.94	402.36	30.69	11.01	0.25	2.22	30	41	29	Clay_loam	Mod_fine	0.2325	Semi_arid	1155	19.875	86	842	123	633	10	80	_Bare_areas	LC_19
K65	36.956867	-1.434717	Kenya	8.1	Alkaline	Moderately_alkaline	827.31	12494.08	304.32	54	13.88	0.25	2.13	41	39	20	Loam	Medium	0.2283	Semi_arid	1162	20.0874996	87	822	128	598	7	85	_Sparse_(>15%)_vegetation_(woody_vegetation,_shrubs,_grassland)	LC_14
K66	37.148333	-0.31815	Kenya	6.84	Neutral	Neutral	452.29	4909.47	411.83	20.95	12.37	0.91	3.74	44	32	24	Loam	Medium	0.391	Semi_arid	1803	14.9292002	87	708	130	1247	13	84	_Sparse_(>15%)_vegetation_(woody_vegetation,_shrubs,_grassland)	LC_14
K67	36.935333	0.0331	Kenya	6.55	Neutral	Neutral	788.3	3545.16	579.2	67.42	28.29	0.34	2.61	29	38	33	Clay_loam	Mod_fine	0.4999	Semi_arid	1543	16.7999992	82	582	83	767	23	58	_Mosaic_Vegetation_(grassland,_shrubland,_forest)_(50-70%)_/_Cropland_(20-50%)__	LC_3
K68	36.9546	0	Kenya	6.48	Acidic	Slightly_acid	949.7	3057.14	547.98	41.28	30.26	0.34	2.65	25	41	35	Clay_loam	Mod_fine	0.5067	Dry_sub_humid	1546	16.7416992	80	579	71	765	25	53	_Mosaic_Cropland_(50-70%)_/_Vegetation_(grassland,_shrubland,_forest)_(20-50%)	LC_2
K69	38.137467	0.2645	Kenya	7.18	Neutral	Neutral	992.94	6780.03	1002.9	103.03	76.23	0.2	2.36	13	55	32	Silty_clay_loam	Mod_fine	0.2572	Semi_arid	1587	23.4291992	84	851	149	631	1	118	_Mosaic_Forest/Shrubland_(50-70%)_/_Grassland_(20-50%)	LC_10
K7	38.337583	-3.442139	Kenya	3.75	Acidic	Extremely_acid	20.54	4.93	23.66	19.34	3.82	0.43	4.96	84	5	11	Loamy_sand	Coarse	0.174	Arid	1173	18.2250004	77	1366	160	1183	5	115	_Mosaic_Forest/Shrubland_(50-70%)_/_Grassland_(20-50%)	LC_10
K70	36.637567	-1.39605	Kenya	6.37	Acidic	Slightly_acid	572.69	4520.69	701.78	34.22	42.17	0.64	4.14	32	45	23	Loam	Medium	0.2819	Semi_arid	1250	16.6625004	85	938	104	1307	19	67	_Mosaic_Forest/Shrubland_(50-70%)_/_Grassland_(20-50%)	LC_10
K71	36.6447	-1.447367	Kenya	6.83	Neutral	Neutral	920.65	5381.41	682.98	32.2	92.35	0.49	3.25	25	45	30	Clay_loam	Mod_fine	0.2531	Semi_arid	1405	17.7625008	86	907	113	1162	14	74	_Sparse_(>15%)_vegetation_(woody_vegetation,_shrubs,_grassland)	LC_14
K73	37.255833	-1.139683	Kenya	5.03	Acidic	Very_strongly_acid	228.07	3974.81	579.49	45.72	87.29	1.02	6.41	31	33	36	Clay_loam	Mod_fine	0.4491	Semi_arid	2850	16.9542007	87	808	108	1548	6	92	_Mosaic_Cropland_(50-70%)_/_Vegetation_(grassland,_shrubland,_forest)_(20-50%)	LC_2
K74	37.685433	-1.122567	Kenya	7.16	Neutral	Neutral	253.36	4165.85	380.6	27.85	10.12	0.15	0.95	59	13	28	Sandy_clay_loam	Mod_fine	0.1894	Arid	1209	20.8957996	87	762	154	690	2	105	_Mosaic_Forest/Shrubland_(50-70%)_/_Grassland_(20-50%)	LC_10
K75	36.069367	-0.333833	Kenya	6.83	Neutral	Neutral	1549.51	2878.53	181.64	468.98	33.77	0.35	2.69	19	53	27	Silty_loam	Medium	0.3725	Semi_arid	1554	17.6667004	88	608	139	808	25	41	_Mosaic_Forest/Shrubland_(50-70%)_/_Grassland_(20-50%)	LC_10
K76	36.062817	-0.432617	Kenya	7.09	Neutral	Neutral	694.84	4752.92	596.85	28.38	6.87	0.8	5.64	43	35	22	Loam	Medium	0.4265	Semi_arid	2130	16.4417	87	657	125	766	22	47	_Mosaic_Forest/Shrubland_(50-70%)_/_Grassland_(20-50%)	LC_10
K77	36.050167	-0.223283	Kenya	6.56	Neutral	Neutral	226.11	2470.1	249.76	36.64	0.65	0.42	4.78	27	54	19	Silty_loam	Medium	0.3237	Semi_arid	1571	16.3500004	88	654	153	932	27	37	_Mosaic_Forest/Shrubland_(50-70%)_/_Grassland_(20-50%)	LC_10
K78	37.537533	-2.454183	Kenya	8.02	Alkaline	Moderately_alkaline	410.73	10878.97	584.83	32.47	48.15	0.28	2.26	63	22	16	Sandy_loam	Mod_coarse	0.1145	Arid	1081	21.8542004	82	900	183	667	1	105	_Bare_areas	LC_19
K79	37.2589	-2.6825	Kenya	8.97	Alkaline	Strongly_alkaline	2893.66	13669.41	999.8	1069.19	35.37	0.57	4.03	26	46	28	Clay_loam	Mod_fine	0.1068	Arid	805	21.6667004	81	946	193	648	0	102	_Bare_areas	LC_19
K8	38.342778	-3.371389	Kenya	4.97	Acidic	Very_strongly_acid	40.6	1033.21	112.36	13.38	9.62	0.32	2.85	92	2	6	Sand	Coarse	0.1785	Arid	1382	17.8458004	77	1369	161	1177	5	114	_Mosaic_Vegetation_(grassland,_shrubland,_forest)_(50-70%)_/_Cropland_(20-50%)__	LC_3
K80	37.14565	-2.67355	Kenya	9.89	Alkaline	Very_strongly_alkaline	2836.66	8574.34	1428.81	2418.53	173.55	0.43	2.65	10	40	49	Silty_clay	Fine	0.1071	Arid	1369	21.9500008	82	903	189	611	1	97	_Bare_areas	LC_19
K81	37.274483	-2.724067	Kenya	9.71	Alkaline	Very_strongly_alkaline	5034.32	10285.77	1094.54	4148.01	168.37	0.27	2.08	5	46	49	Silty_clay	Fine	0.109	Arid	1403	21.7917004	82	926	190	708	1	97	_Bare_areas	LC_19
MZ1	32.6576	-25.5185	Mozambique	5.51	Acidic	Strongly_acid	22.92	286.27	42.03	17.15	12.85	0.04	0.4	92	2	6	Sand	Coarse	0.4924	Semi_arid	4520	23.3	63	2501	127	787	17	61	_Mosaic_Vegetation_(grassland,_shrubland,_forest)_(50-70%)_/_Cropland_(20-50%)__	LC_3
MZ10	32.5949	-23.6205	Mozambique	7.62	Alkaline	Slightly_alkaline	507.75	3123.38	669.58	95.99	28.41	0.12	1.17	54	10	35	Sandy_clay	Fine	0.2826	Semi_arid	3437	24.1	60	3216	107	500	5	82	_Mosaic_Vegetation_(grassland,_shrubland,_forest)_(50-70%)_/_Cropland_(20-50%)__	LC_3
MZ100	35.2383	-24.2687	Mozambique	6.18	Acidic	Slightly_acid	20.57	314.6	70.65	14.93	12.13	0.05	0.6	90	2	8	Sand	Coarse	0.5972	Dry_sub_humid	3966	23	60	2477	134	976	37	48	_Open_(15-40%)_broadleaved_deciduous_forest_(>5m)	LC_6
MZ101	34.9499	-24.5306	Mozambique	5.18	Acidic	Strongly_acid	17.63	148.72	49.34	10.57	12.99	0.04	0.54	91	3	6	Sand	Coarse	0.5456	Dry_sub_humid	3848	23.4	62	2276	141	893	32	45	_Mosaic_Vegetation_(grassland,_shrubland,_forest)_(50-70%)_/_Cropland_(20-50%)__	LC_3
MZ102	32.549	-25.9336	Mozambique	7.02	Neutral	Neutral	44.81	923.33	135.62	20.68	165.09	0.09	0.94	90	3	7	Sand	Coarse	0.4472	Semi_arid	1820	22.8	57	2606	123	772	15	69	_Artificial_surfaces_and_associated_areas_(urban_areas_>50%)_GLOBCOVER_2009	LC_18
MZ103	32.1775	-25.6369	Mozambique	7	Neutral	Neutral	599.7	3770.09	913.17	76.42	5.45	0.19	2.48	32	35	33	Clay_loam	Mod_fine	0.3798	Semi_arid	3873	23.5	62	2845	111	656	10	69	_Mosaic_Forest/Shrubland_(50-70%)_/_Grassland_(20-50%)	LC_10
MZ104	31.9931	-25.4831	Mozambique	6.94	Neutral	Neutral	433.44	3021.64	589.07	85.34	10.94	0.17	1.97	48	23	29	Sandy_clay_loam	Mod_fine	0.4159	Semi_arid	3446	23.1	60	3033	100	634	10	68	_Mosaic_Vegetation_(grassland,_shrubland,_forest)_(50-70%)_/_Cropland_(20-50%)__	LC_3
MZ11	33.1054	-24.5101	Mozambique	6.8	Neutral	Neutral	109.53	310.63	149.34	61.56	27.04	0.02	0.36	85	3	12	Loamy_sand	Coarse	0.3851	Semi_arid	4472	23.9	61	2928	116	679	16	67	_Mosaic_Vegetation_(grassland,_shrubland,_forest)_(50-70%)_/_Cropland_(20-50%)__	LC_3
MZ12	33.3598	-24.6659	Mozambique	6.84	Neutral	Neutral	452.07	3315.59	1411.67	99.5	77.06	0.18	1.29	25	23	52	Clay	Fine	0.4531	Semi_arid	5189	24.1	63	2745	126	761	20	61	_Mosaic_Grassland_(50-70%)_/_Forest/Shrubland_(20-50%)	LC_11
MZ13	32.6157	-26.0646	Mozambique	6.83	Neutral	Neutral	47.57	611.82	74.13	21.9	17.07	0.03	0.4	90	3	7	Sand	Coarse	0.4846	Semi_arid	4282	22.7	57	2630	124	760	17	64	_Mosaic_Vegetation_(grassland,_shrubland,_forest)_(50-70%)_/_Cropland_(20-50%)__	LC_3
MZ14	32.4778	-26.3285	Mozambique	6.94	Neutral	Neutral	40.07	956.21	162.74	28.46	7.91	0.05	0.6	90	0	10	Sand	Coarse	0.4447	Semi_arid	3705	21.8	59	2591	108	676	16	63	_Mosaic_Vegetation_(grassland,_shrubland,_forest)_(50-70%)_/_Cropland_(20-50%)__	LC_3
MZ15	32.2672	-26.0777	Mozambique	8.34	Alkaline	Moderately_alkaline	247.13	10597	825.2	83.17	6.65	0.18	1.42	32	36	32	Clay_loam	Mod_fine	0.3901	Semi_arid	3397	22.9	58	2909	105	662	10	70	_Closed_to_open_(>15%)_grassland	LC_13
MZ16	32.0444	-25.9913	Mozambique	6.07	Acidic	Moderately_acid	121.77	450.87	202.92	29.69	8.24	0.11	1.17	41	31	27	Loam	Medium	0.4886	Semi_arid	4524	21.1	63	2244	111	869	18	63	_Mosaic_Vegetation_(grassland,_shrubland,_forest)_(50-70%)_/_Cropland_(20-50%)__	LC_3
MZ17	32.2686	-25.8292	Mozambique	5.76	Acidic	Moderately_acid	155.91	478.47	209.88	40.75	11.42	0.11	1.24	54	25	20	Sandy_clay_loam	Mod_fine	0.3645	Semi_arid	3558	23.4	60	2862	111	682	11	70	_Mosaic_Vegetation_(grassland,_shrubland,_forest)_(50-70%)_/_Cropland_(20-50%)__	LC_3
MZ18	33.7733	-25.0236	Mozambique	5.87	Acidic	Moderately_acid	31.27	367.67	70.1	24.92	14.42	0.05	0.56	92	0	8	Sand	Coarse	0.5979	Dry_sub_humid	3977	23	60	2632	121	874	29	45	_Open_(15-40%)_broadleaved_deciduous_forest_(>5m)	LC_6
MZ19	34.2731	-24.8274	Mozambique	5.94	Acidic	Moderately_acid	18.46	334.57	72.12	21.79	8.16	0.03	0.55	91	1	8	Sand	Coarse	0.5699	Dry_sub_humid	4233	23	64	2230	134	871	30	51	_Closed_(>40%)_broadleaved_deciduous_forest_(>5m)	LC_5
MZ2	32.8112	-25.1312	Mozambique	5.76	Acidic	Moderately_acid	121.57	1424.99	613.98	122.71	51.29	0.13	0	44	23	33	Clay_loam	Mod_fine	0.4981	Semi_arid	5784	23.2	62	2702	116	772	18	61	_Mosaic_Vegetation_(grassland,_shrubland,_forest)_(50-70%)_/_Cropland_(20-50%)__	LC_3
MZ20	34.7474	-24.6899	Mozambique	5.97	Acidic	Moderately_acid	27.81	434.86	112.87	21.99	17.75	0.04	0.59	92	0	8	Sand	Coarse	0.5493	Dry_sub_humid	3807	23.3	63	2116	145	942	36	48	_Mosaic_Vegetation_(grassland,_shrubland,_forest)_(50-70%)_/_Cropland_(20-50%)__	LC_3
MZ21	35.5268	-22.8608	Mozambique	8.18	Alkaline	Moderately_alkaline	110.85	1091.13	376.57	660.87	19.96	0.01	0.29	97	0	3	Sand	Coarse	0.5581	Dry_sub_humid	3419	23.6	61	2246	138	953	23	66	_Mosaic_Vegetation_(grassland,_shrubland,_forest)_(50-70%)_/_Cropland_(20-50%)__	LC_3
MZ22	35.3914	-23.0619	Mozambique	7.34	Neutral	Neutral	18.89	671.49	52.09	20.5	21.48	0.03	0.48	95	1	4	Sand	Coarse	0.567	Dry_sub_humid	4208	23.2	64	2155	133	987	25	64	_Mosaic_Cropland_(50-70%)_/_Vegetation_(grassland,_shrubland,_forest)_(20-50%)	LC_2
MZ23	35.2858	-23.1059	Mozambique	6.86	Neutral	Neutral	70.37	862.18	108.13	28.03	3.88	0.07	0.8	82	0	18	Sandy_clay_loam	Mod_fine	0.5411	Dry_sub_humid	4739	23.2	64	2200	131	959	24	65	_Mosaic_Vegetation_(grassland,_shrubland,_forest)_(50-70%)_/_Cropland_(20-50%)__	LC_3
MZ24	35.1293	-22.6659	Mozambique	6.76	Neutral	Neutral	52.12	769.81	59.59	21.34	9.31	0.06	0.73	86	2	12	Loamy_sand	Coarse	0.4907	Semi_arid	4620	23.5	62	2409	128	832	19	75	_Mosaic_Vegetation_(grassland,_shrubland,_forest)_(50-70%)_/_Cropland_(20-50%)__	LC_3
MZ25	35.0956	-22.4866	Mozambique	6.58	Neutral	Neutral	56.51	939.53	70.55	24.18	23.2	0.06	0.59	87	0	13	Loamy_sand	Coarse	0.4782	Semi_arid	5442	23.5	61	2496	128	806	17	78	_Mosaic_Vegetation_(grassland,_shrubland,_forest)_(50-70%)_/_Cropland_(20-50%)__	LC_3
MZ26	35.2476	-21.9966	Mozambique	6.66	Neutral	Neutral	12.02	354.51	50.95	18.39	9.97	0.03	0.29	97	0	3	Sand	Coarse	0.4998	Semi_arid	3722	23.6	56	2576	134	820	16	81	_Mosaic_Vegetation_(grassland,_shrubland,_forest)_(50-70%)_/_Cropland_(20-50%)__	LC_3
MZ27	35.4549	-21.7864	Mozambique	5.8	Acidic	Moderately_acid	29.11	454.96	82.51	30.24	47.88	0.06	0.51	93	0	7	Sand	Coarse	0.533	Dry_sub_humid	2002	23.7	54	2579	138	866	16	78	_Mosaic_Vegetation_(grassland,_shrubland,_forest)_(50-70%)_/_Cropland_(20-50%)__	LC_3
MZ28	35.4546	-21.7888	Mozambique	7.1	Neutral	Neutral	10.15	68.33	17.7	32.36	10.04	0	0.01	97	0	3	Sand	Coarse	0.533	Dry_sub_humid	1176	23.7	54	2579	138	866	16	78	_Mosaic_Vegetation_(grassland,_shrubland,_forest)_(50-70%)_/_Cropland_(20-50%)__	LC_3
MZ3	33.1348	-24.7915	Mozambique	6.19	Acidic	Slightly_acid	26.74	299.32	55.76	18.7	19.37	0.02	0.43	93	2	5	Sand	Coarse	0.5102	Dry_sub_humid	3977	23.1	63	2734	114	831	23	60	_Mosaic_Vegetation_(grassland,_shrubland,_forest)_(50-70%)_/_Cropland_(20-50%)__	LC_3
MZ30	35.0473	-21.5125	Mozambique	8.18	Alkaline	Moderately_alkaline	226.84	2767.9	164.67	31.5	9.63	0.13	1.27	67	10	23	Sandy_clay_loam	Mod_fine	0.5127	Dry_sub_humid	4424	23.6	56	2647	131	812	12	82	_Mosaic_Vegetation_(grassland,_shrubland,_forest)_(50-70%)_/_Cropland_(20-50%)__	LC_3
MZ31	34.6242	-21.1918	Mozambique	8.27	Alkaline	Moderately_alkaline	302.19	6341.33	310.11	40.97	9.85	0.12	1.35	73	7	20	Sandy_clay_loam	Mod_fine	0.4966	Semi_arid	5438	23.4	58	2637	126	812	11	87	_Closed_(>40%)_broadleaved_deciduous_forest_(>5m)	LC_5
MZ32	34.2262	-20.8345	Mozambique	7.35	Neutral	Neutral	56.06	714.15	191.11	34	3.64	0.05	0.54	86	0	14	Loamy_sand	Coarse	0.4701	Semi_arid	3709	23.9	58	2687	125	824	10	90	_Mosaic_Vegetation_(grassland,_shrubland,_forest)_(50-70%)_/_Cropland_(20-50%)__	LC_3
MZ33	33.967	-20.4251	Mozambique	6.93	Neutral	Neutral	48.27	843.81	145.8	19.49	8.44	0.1	1.16	81	1	18	Sandy_clay_loam	Mod_fine	0.5248	Dry_sub_humid	4832	23.4	58	2704	120	944	11	90	_Closed_(>40%)_broadleaved_deciduous_forest_(>5m)	LC_5
MZ34	33.837	-20.0069	Mozambique	7.15	Neutral	Neutral	124.89	2974.28	941.34	96.02	4.57	0.1	1.05	64	3	33	Sandy_clay_loam	Mod_fine	0.5092	Dry_sub_humid	5038	23.9	59	2726	121	936	10	90	_Open_(15-40%)_broadleaved_deciduous_forest_(>5m)	LC_6
MZ35	33.8801	-19.2758	Mozambique	5.96	Acidic	Moderately_acid	47.85	865.66	96.14	21.44	50.88	0.06	0.94	85	3	12	Loamy_sand	Coarse	0.5561	Dry_sub_humid	3431	23.8	62	2634	121	1016	12	91	_Mosaic_Vegetation_(grassland,_shrubland,_forest)_(50-70%)_/_Cropland_(20-50%)__	LC_3
MZ36	33.4381	-19.1072	Mozambique	6.59	Neutral	Neutral	128.99	562.13	107.06	17.65	24.58	0.07	0.71	75	2	23	Sandy_clay_loam	Mod_fine	0.603	Dry_sub_humid	4682	21.7	61	2478	109	1117	16	90	_Open_(15-40%)_broadleaved_deciduous_forest_(>5m)	LC_6
MZ37	33.3119	-18.7704	Mozambique	6.44	Acidic	Slightly_acid	42.77	656.49	83.89	18.29	34.78	0.07	0.67	82	0	18	Sandy_clay_loam	Mod_fine	0.6095	Dry_sub_humid	3813	22	60	2694	103	1339	17	91	_Mosaic_Vegetation_(grassland,_shrubland,_forest)_(50-70%)_/_Cropland_(20-50%)__	LC_3
MZ38	33.2102	-18.2796	Mozambique	6.1	Acidic	Slightly_acid	37.96	1003.76	112.43	19.25	94.86	0.08	1.12	82	1	16	Loamy_sand	Coarse	0.6736	Humid	3995	22.2	58	2674	107	1683	18	93	_Open_(15-40%)_broadleaved_deciduous_forest_(>5m)	LC_6
MZ39	33.2221	-17.8361	Mozambique	7.61	Alkaline	Slightly_alkaline	94.7	3561.51	218.03	28.17	184.36	0.14	1.89	71	8	20	Sandy_clay_loam	Mod_fine	0.646	Dry_sub_humid	5032	22.1	59	2622	108	1284	8	104	_Open_(15-40%)_broadleaved_deciduous_forest_(>5m)	LC_6
MZ4	32.8864	-24.3735	Mozambique	7.46	Alkaline	Slightly_alkaline	152.19	1570.47	159.51	30.51	145.82	0.04	0.55	84	2	14	Loamy_sand	Coarse	0.3692	Semi_arid	3773	24	60	3076	111	633	14	70	_Closed_to_open_(>15%)_shrubland_(<5m)	LC_12
MZ40	33.3755	-17.3835	Mozambique	7.1	Neutral	Neutral	119.77	1633.25	326.98	43.63	26.63	0.08	1.05	72	4	25	Sandy_clay_loam	Mod_fine	0.4803	Semi_arid	5616	22.2	61	2328	117	868	3	111	_Mosaic_Vegetation_(grassland,_shrubland,_forest)_(50-70%)_/_Cropland_(20-50%)__	LC_3
MZ41	33.2689	-16.8529	Mozambique	7.17	Neutral	Neutral	558.69	2325.35	318.12	34.22	280.56	0.11	1	70	9	22	Sandy_clay_loam	Mod_fine	0.3308	Semi_arid	3831	25.1	61	2630	132	603	0	118	_Mosaic_Vegetation_(grassland,_shrubland,_forest)_(50-70%)_/_Cropland_(20-50%)__	LC_3
MZ42	33.4049	-16.4121	Mozambique	6.8	Neutral	Neutral	155.31	1587.68	248.79	22.15	24.99	0.12	1.14	79	2	18	Sandy_clay_loam	Mod_fine	0.3336	Semi_arid	5051	25.3	59	2611	141	645	1	117	_Closed_to_open_(>15%)_shrubland_(<5m)	LC_12
MZ43	33.1985	-16.05	Mozambique	8.18	Alkaline	Moderately_alkaline	187.07	5252.39	768.66	31.2	14.25	0.13	1.35	68	16	15	Sandy_loam	Mod_coarse	0.3493	Semi_arid	4407	25.7	59	2590	143	690	2	115	_Mosaic_Vegetation_(grassland,_shrubland,_forest)_(50-70%)_/_Cropland_(20-50%)__	LC_3
MZ44	32.8923	-15.7525	Mozambique	6.43	Acidic	Slightly_acid	147.3	1100.78	490.04	70.94	23.4	0.1	0.8	69	3	28	Sandy_clay_loam	Mod_fine	0.3841	Semi_arid	3776	26.1	61	2567	142	688	1	117	_Mosaic_Vegetation_(grassland,_shrubland,_forest)_(50-70%)_/_Cropland_(20-50%)__	LC_3
MZ45	32.6989	-15.5886	Mozambique	7.2	Neutral	Neutral	236.11	2639.52	274.91	47.73	112.93	0.13	1.09	78	2	20	Sandy_clay_loam	Mod_fine	0.3614	Semi_arid	4003	25.9	61	2570	139	689	1	120	_Mosaic_Vegetation_(grassland,_shrubland,_forest)_(50-70%)_/_Cropland_(20-50%)__	LC_3
MZ46	34.207	-15.8023	Mozambique	7.19	Neutral	Neutral	110.43	951.85	176.92	28.12	16.01	0.05	0.36	77	5	18	Sandy_clay_loam	Mod_fine	0.4565	Semi_arid	4322	25.2	56	2589	147	865	5	100	_Closed_to_open_(>15%)_grassland	LC_13
MZ47	35.7512	-16.0892	Mozambique	4.84	Acidic	Very_strongly_acid	46.83	280.49	86.31	24.89	49.15	0.13	1.81	63	10	27	Sandy_clay_loam	Mod_fine	1.1864	Humid	4211	22.4	61	2315	123	1732	25	75	_Mosaic_Vegetation_(grassland,_shrubland,_forest)_(50-70%)_/_Cropland_(20-50%)__	LC_3
MZ48	35.9473	-16.312	Mozambique	5.17	Acidic	Strongly_acid	28.62	221.09	48.5	31.48	15.64	0.04	0.32	83	1	16	Loamy_sand	Coarse	1.0691	Humid	4988	23.3	64	2016	135	1673	24	77	_Mosaic_Vegetation_(grassland,_shrubland,_forest)_(50-70%)_/_Cropland_(20-50%)__	LC_3
MZ49	37.0023	-16.8061	Mozambique	6.13	Acidic	Slightly_acid	84.82	791.68	169.06	43.1	20.64	0.06	0.73	77	5	18	Sandy_clay_loam	Mod_fine	0.762	Humid	4278	25	58	2671	142	1224	13	82	_Mosaic_Vegetation_(grassland,_shrubland,_forest)_(50-70%)_/_Cropland_(20-50%)__	LC_3
MZ5	32.6094	-24.3031	Mozambique	7.35	Neutral	Neutral	155.33	1373.17	315.6	39.15	35.13	0.06	0.58	84	6	10	Loamy_sand	Coarse	0.3694	Semi_arid	4197	23.7	59	3267	103	631	13	69	_Mosaic_Vegetation_(grassland,_shrubland,_forest)_(50-70%)_/_Cropland_(20-50%)__	LC_3
MZ50	37.2021	-16.4274	Mozambique	5.76	Acidic	Moderately_acid	30.6	224.37	39.04	14.54	18.2	0.04	0.4	82	4	14	Loamy_sand	Coarse	0.9059	Humid	5301	24.1	57	2557	134	1473	17	83	_Closed_(>40%)_broadleaved_deciduous_forest_(>5m)	LC_5
MZ51	37.1688	-16.0645	Mozambique	5.53	Acidic	Strongly_acid	69.84	187.99	96.24	32.64	1.61	0.04	0.39	50	3	47	Sandy_clay	Fine	0.9598	Humid	3634	23.5	54	2704	117	1575	19	84	_Mosaic_Vegetation_(grassland,_shrubland,_forest)_(50-70%)_/_Cropland_(20-50%)__	LC_3
MZ53	36.7976	-15.3536	Mozambique	5.51	Acidic	Strongly_acid	215.56	1070.29	224.98	25.73	147.16	0.14	1.73	58	16	26	Sandy_clay_loam	Mod_fine	0.9296	Humid	5882	22	60	2296	125	1549	16	86	_Mosaic_Vegetation_(grassland,_shrubland,_forest)_(50-70%)_/_Cropland_(20-50%)__	LC_3
MZ54	36.9328	-15.1265	Mozambique	6.09	Acidic	Moderately_acid	24.98	448.58	43.56	14.27	27.57	0.04	0.5	84	2	14	Loamy_sand	Coarse	0.726	Humid	5063	22.6	60	2346	122	1187	9	99	_Open_(15-40%)_broadleaved_deciduous_forest_(>5m)	LC_6
MZ55	36.4411	-14.7414	Mozambique	5.48	Acidic	Strongly_acid	95.21	1124.38	254.35	44.94	33.99	0.13	1.49	60	10	30	Sandy_clay_loam	Mod_fine	0.5435	Dry_sub_humid	5109	24.1	59	2546	127	969	2	115	_Closed_to_open_(>15%)_shrubland_(<5m)	LC_12
MZ56	36.2338	-14.3658	Mozambique	6.03	Acidic	Moderately_acid	24.6	552.56	86.75	15.8	40.34	0.04	0.69	87	1	12	Loamy_sand	Coarse	0.5884	Dry_sub_humid	4192	23.3	60	2260	131	1029	1	114	_Closed_to_open_(>15%)_shrubland_(<5m)	LC_12
MZ57	35.8845	-14.2297	Mozambique	6	Acidic	Moderately_acid	23.97	331.27	46.35	16.64	44.6	0.04	0.47	86	1	13	Loamy_sand	Coarse	0.5852	Dry_sub_humid	4809	23.5	59	2161	139	1017	1	114	_Closed_to_open_(>15%)_shrubland_(<5m)	LC_12
MZ58	35.5037	-14.193	Mozambique	6.37	Acidic	Slightly_acid	60.35	701.24	80.84	19.03	129.63	0.04	0.54	83	3	14	Sandy_loam	Mod_coarse	0.6199	Dry_sub_humid	4176	21.7	60	1967	128	1035	1	112	_Closed_to_open_(>15%)_grassland	LC_13
MZ59	35.3511	-13.7823	Mozambique	6.37	Acidic	Slightly_acid	85.54	893.93	159.7	17.91	93.5	0.1	1.21	71	9	20	Sandy_clay_loam	Mod_fine	0.6537	Humid	5204	20.9	60	1843	123	1101	0	111	_Closed_to_open_(>15%)_shrubland_(<5m)	LC_12
MZ6	32.2494	-24.0454	Mozambique	6.75	Neutral	Neutral	149.9	776.87	135.73	26.83	38.58	0.07	0.6	83	5	12	Loamy_sand	Coarse	0.3054	Semi_arid	4396	23.4	58	3475	93	551	8	74	_Closed_to_open_(>15%)_shrubland_(<5m)	LC_12
MZ60	35.2329	-13.2695	Mozambique	6.19	Acidic	Slightly_acid	134.29	941.94	174.88	22.7	103.34	0.15	1.56	48	15	37	Sandy_clay	Fine	0.6352	Dry_sub_humid	4208	19.1	60	1956	98	1141	2	101	_Mosaic_Vegetation_(grassland,_shrubland,_forest)_(50-70%)_/_Cropland_(20-50%)__	LC_3
MZ61	35.0638	-12.9187	Mozambique	5.85	Acidic	Moderately_acid	85.11	337.85	103.1	22.46	65.35	0.12	1.63	60	11	30	Sandy_clay_loam	Mod_fine	0.7451	Humid	4663	19.3	57	2067	100	1309	2	101	_Mosaic_Vegetation_(grassland,_shrubland,_forest)_(50-70%)_/_Cropland_(20-50%)__	LC_3
MZ63	35.6308	-13.3506	Mozambique	6.51	Acidic	Slightly_acid	91.36	409.88	170.88	20.17	7.41	0.11	1.6	59	8	33	Sandy_clay_loam	Mod_fine	0.7733	Humid	4817	20.1	58	2049	110	1270	1	105	_Closed_(>40%)_broadleaved_deciduous_forest_(>5m)	LC_5
MZ64	36.032	-13.3649	Mozambique	5.93	Acidic	Moderately_acid	54.23	759	171.51	24.13	73.22	0.1	1.21	72	10	18	Sandy_clay_loam	Mod_fine	0.6939	Humid	4081	23.4	58	2103	142	1210	1	111	_Open_(15-40%)_broadleaved_deciduous_forest_(>5m)	LC_6
MZ65	36.3268	-13.4935	Mozambique	5.93	Acidic	Moderately_acid	12.17	535.88	53.98	11.9	15.71	0.04	0.6	90	1	9	Sand	Coarse	0.643	Dry_sub_humid	4002	23.7	59	2082	143	1165	1	112	_Closed_(>40%)_broadleaved_deciduous_forest_(>5m)	LC_5
MZ66	36.6649	-13.3974	Mozambique	6.5	Acidic	Slightly_acid	37.78	713.13	97.47	17.91	69.74	0.04	0.8	83	3	14	Loamy_sand	Coarse	0.6345	Dry_sub_humid	4782	23.6	59	2101	142	1189	1	112	_Closed_(>40%)_broadleaved_deciduous_forest_(>5m)	LC_5
MZ67	37.1055	-13.3541	Mozambique	6.58	Neutral	Neutral	32.64	1193.98	140.42	18.68	77.84	0.06	1.42	86	2	12	Loamy_sand	Coarse	0.6173	Dry_sub_humid	5146	23.2	59	2076	139	1184	1	113	_Open_(15-40%)_broadleaved_deciduous_forest_(>5m)	LC_6
MZ68	37.5337	-13.2102	Mozambique	6.29	Acidic	Slightly_acid	47.92	184.91	49.8	18.03	91.09	0.05	0.63	74	1	24	Sandy_clay_loam	Mod_fine	0.6174	Dry_sub_humid	4127	22.5	59	2036	134	1142	1	114	_Mosaic_Vegetation_(grassland,_shrubland,_forest)_(50-70%)_/_Cropland_(20-50%)__	LC_3
MZ69	37.9068	-13.415	Mozambique	6.75	Neutral	Neutral	56.65	829.75	94.7	15.83	55.41	0.05	0.71	85	1	14	Loamy_sand	Coarse	0.605	Dry_sub_humid	4700	23.9	64	1885	141	1072	0	112	_Mosaic_Vegetation_(grassland,_shrubland,_forest)_(50-70%)_/_Cropland_(20-50%)__	LC_3
MZ7	32.1439	-23.8458	Mozambique	8.33	Alkaline	Moderately_alkaline	465.25	6916.53	834.69	46.77	74.34	0.09	0.74	64	20	16	Sandy_loam	Mod_coarse	0.2759	Semi_arid	3791	23.5	58	3562	91	500	5	77	_Open_(15-40%)_broadleaved_deciduous_forest_(>5m)	LC_6
MZ71	39.0278	-13.1136	Mozambique	6.67	Neutral	Neutral	40.1	907.99	192.08	19.32	22.56	0.05	0.64	86	0	14	Loamy_sand	Coarse	0.5348	Dry_sub_humid	3187	24.5	65	1700	154	1000	2	112	_Mosaic_Vegetation_(grassland,_shrubland,_forest)_(50-70%)_/_Cropland_(20-50%)__	LC_3
MZ72	39.4157	-12.9235	Mozambique	7.37	Neutral	Neutral	111.2	2058.99	184.88	19.29	11.03	0.11	1.24	71	3	26	Sandy_clay_loam	Mod_fine	0.5631	Dry_sub_humid	7112	25	72	1196	170	1077	3	111	_Closed_to_open_(>15%)_shrubland_(<5m)	LC_12
MZ73	39.7911	-13.0738	Mozambique	6.82	Neutral	Neutral	83.88	1253.61	149.11	20.3	182	0.09	1.28	84	3	13	Loamy_sand	Coarse	0.5606	Dry_sub_humid	4634	25.6	79	895	179	1101	4	107	_Mosaic_Vegetation_(grassland,_shrubland,_forest)_(50-70%)_/_Cropland_(20-50%)__	LC_3
MZ74	40.2529	-13.1398	Mozambique	6.71	Neutral	Neutral	97.32	1393.09	175.61	21.18	74.02	0.09	1.09	83	2	15	Loamy_sand	Coarse	0.4949	Semi_arid	7195	25.6	76	1220	181	943	4	101	_Mosaic_Vegetation_(grassland,_shrubland,_forest)_(50-70%)_/_Cropland_(20-50%)__	LC_3
MZ75	40.5705	-12.9657	Mozambique	7.91	Alkaline	Moderately_alkaline	48.23	1304.67	197.89	25.46	50.07	0.05	0.65	91	1	8	Sand	Coarse	0.4369	Semi_arid	3192	26.3	72	1382	193	877	4	94	_Mosaic_Vegetation_(grassland,_shrubland,_forest)_(50-70%)_/_Cropland_(20-50%)__	LC_3
MZ78	39.815	-13.2875	Mozambique	8.2	Alkaline	Moderately_alkaline	134.43	2915.12	237.57	32.3	114.4	0.06	0.8	84	2	14	Loamy_sand	Coarse	0.5541	Dry_sub_humid	6258	25.5	77	1109	175	1044	4	106	_Mosaic_Vegetation_(grassland,_shrubland,_forest)_(50-70%)_/_Cropland_(20-50%)__	LC_3
MZ79	39.8475	-13.6702	Mozambique	7.42	Alkaline	Slightly_alkaline	236.39	2436.41	426.86	58.12	31.64	0.12	1.45	60	9	31	Sandy_clay_loam	Mod_fine	0.5651	Dry_sub_humid	5624	25	72	1601	162	976	4	108	_Mosaic_Vegetation_(grassland,_shrubland,_forest)_(50-70%)_/_Cropland_(20-50%)__	LC_3
MZ8	32.1096	-23.82	Mozambique	8.27	Alkaline	Moderately_alkaline	215.47	2005.62	419.72	31.28	44.83	0.08	0.81	81	5	14	Loamy_sand	Coarse	0.2659	Semi_arid	4312	23.5	58	3561	91	493	5	76	_Open_(15-40%)_broadleaved_deciduous_forest_(>5m)	LC_6
MZ80	39.9238	-14.0867	Mozambique	7.25	Neutral	Neutral	104.4	1555.77	297.6	17.78	72.83	0.1	1.49	82	0	18	Sandy_clay_loam	Mod_fine	0.5306	Dry_sub_humid	5080	24.6	73	1470	158	952	4	109	_Mosaic_Vegetation_(grassland,_shrubland,_forest)_(50-70%)_/_Cropland_(20-50%)__	LC_3
MZ81	39.8975	-14.5139	Mozambique	7.09	Neutral	Neutral	56.11	537.61	81.29	19.93	41.27	0.06	0.66	85	2	13	Loamy_sand	Coarse	0.5427	Dry_sub_humid	5955	24.1	74	1417	155	1006	6	108	_Mosaic_Vegetation_(grassland,_shrubland,_forest)_(50-70%)_/_Cropland_(20-50%)__	LC_3
MZ82	39.9624	-14.8901	Mozambique	6.4	Acidic	Slightly_acid	121.91	735.67	138.53	14.21	12.39	0.06	0.66	80	2	18	Sandy_clay_loam	Mod_fine	0.5295	Dry_sub_humid	5539	24.5	75	1270	163	970	5	105	_Mosaic_Vegetation_(grassland,_shrubland,_forest)_(50-70%)_/_Cropland_(20-50%)__	LC_3
MZ85	39.5077	-15.0767	Mozambique	7.03	Neutral	Neutral	87.1	788.71	71.4	20.44	29.24	0.06	0.71	83	3	14	Loamy_sand	Coarse	0.594	Dry_sub_humid	5458	24.8	65	1995	155	1126	7	99	_Mosaic_Vegetation_(grassland,_shrubland,_forest)_(50-70%)_/_Cropland_(20-50%)__	LC_3
MZ86	39.125	-15.2225	Mozambique	7.34	Neutral	Neutral	118.8	1505.41	156.3	21	75.01	0.11	1.1	76	3	21	Sandy_clay_loam	Mod_fine	0.6139	Dry_sub_humid	4021	25.2	63	2260	158	1099	7	95	_Mosaic_Vegetation_(grassland,_shrubland,_forest)_(50-70%)_/_Cropland_(20-50%)__	LC_3
MZ87	38.6482	-15.5043	Mozambique	6.61	Neutral	Neutral	103.25	687.03	171.37	19.11	24.56	0.1	1.18	66	1	33	Sandy_clay_loam	Mod_fine	0.6736	Humid	3926	24.3	62	2362	147	1199	10	93	_Mosaic_Vegetation_(grassland,_shrubland,_forest)_(50-70%)_/_Cropland_(20-50%)__	LC_3
MZ88	38.1476	-15.5345	Mozambique	6.75	Neutral	Neutral	79.08	710.92	111.3	16.64	24.35	0.07	1.08	76	3	21	Sandy_clay_loam	Mod_fine	0.7221	Humid	5380	23.5	61	2400	135	1255	11	96	_Closed_to_open_(>15%)_shrubland_(<5m)	LC_12
MZ89	37.636	-15.6857	Mozambique	5.4	Acidic	Strongly_acid	30.47	18.02	22.37	15.01	12.11	0.06	0.84	59	1	41	Sandy_clay	Fine	0.8269	Humid	4764	22.7	59	2638	126	1439	16	93	_Mosaic_Vegetation_(grassland,_shrubland,_forest)_(50-70%)_/_Cropland_(20-50%)__	LC_3
MZ9	33.265	-17.0786	Mozambique	7.82	Alkaline	Slightly_alkaline	192.55	1023.17	241.22	30.06	11.46	0.04	0.45	75	5	20	Sandy_clay_loam	Mod_fine	0.3702	Semi_arid	4871	23.5	62	2461	123	655	0	118	_Closed_to_open_(>15%)_shrubland_(<5m)	LC_12
MZ90	37.4913	-16.0631	Mozambique	5.33	Acidic	Strongly_acid	51.42	243.23	79.84	20.75	12.3	0.12	1.55	66	6	28	Sandy_clay_loam	Mod_fine	0.8995	Humid	5955	23.2	55	2681	122	1515	18	86	_Mosaic_Vegetation_(grassland,_shrubland,_forest)_(50-70%)_/_Cropland_(20-50%)__	LC_3
MZ91	37.2414	-16.2986	Mozambique	5.67	Acidic	Moderately_acid	84.68	300.76	82.76	15.46	6.58	0.05	0.73	71	1	29	Sandy_clay_loam	Mod_fine	0.9154	Humid	2798	24	57	2573	130	1503	18	83	_Mosaic_Vegetation_(grassland,_shrubland,_forest)_(50-70%)_/_Cropland_(20-50%)__	LC_3
MZ92	36.9168	-17.7411	Mozambique	5.9	Acidic	Moderately_acid	192.04	766.43	596.65	122.24	1.67	0.21	0.96	16	26	58	Clay	Fine	0.7535	Humid	3720	25.5	61	2306	161	1278	15	77	_Mosaic_Vegetation_(grassland,_shrubland,_forest)_(50-70%)_/_Cropland_(20-50%)__	LC_3
MZ93	36.5458	-17.5624	Mozambique	5.87	Acidic	Moderately_acid	8.37	99.66	33.08	8.53	15.95	0.04	0.52	89	2	9	Loamy_sand	Coarse	0.6574	Humid	3891	25.3	63	2233	155	1104	14	81	_Closed_(>40%)_broadleaved_deciduous_forest_(>5m)	LC_5
MZ94	36.0685	-17.5629	Mozambique	6.01	Acidic	Moderately_acid	83.72	735.49	119.51	23.99	16.34	0.09	1.1	83	0	17	Sandy_clay_loam	Mod_fine	0.5504	Dry_sub_humid	5588	25.1	64	2224	151	934	11	87	_Closed_(>40%)_broadleaved_deciduous_forest_(>5m)	LC_5
MZ95	35.6701	-17.6903	Mozambique	6.46	Acidic	Slightly_acid	104.9	1878.23	424.79	43.61	23.87	0.14	1.69	66	9	25	Sandy_clay_loam	Mod_fine	0.5625	Dry_sub_humid	5165	24.8	64	2233	147	967	10	88	_Closed_(>40%)_broadleaved_deciduous_forest_(>5m)	LC_5
MZ96	35.3267	-17.8946	Mozambique	7.59	Alkaline	Slightly_alkaline	116.9	1441.45	145.71	18.82	129.22	0.11	1.24	83	4	13	Loamy_sand	Coarse	0.601	Dry_sub_humid	6035	25.1	63	2390	142	1008	10	87	_Closed_(>40%)_broadleaved_deciduous_forest_(>5m)	LC_5
MZ97	34.1072	-18.8805	Mozambique	6.73	Neutral	Neutral	129.83	2538.43	256.41	29.95	99.97	0.17	2.23	75	6	19	Sandy_clay_loam	Mod_fine	0.6261	Dry_sub_humid	5599	23.6	60	2725	121	1201	18	87	_Closed_(>40%)_broadleaved_deciduous_forest_(>5m)	LC_5
MZ98	35.535	-23.8314	Mozambique	6.43	Acidic	Slightly_acid	18.26	491.12	132.38	35.51	41.82	0.06	1.06	95	1	4	Sand	Coarse	0.5739	Dry_sub_humid	2525	23.8	58	2349	152	984	30	54	_Closed_to_open_(>15%)_grassland	LC_13
MZ99	35.3057	-23.8193	Mozambique	6.56	Neutral	Neutral	26.61	192.96	64.53	13.51	10.39	0.04	0.48	91	2	7	Sand	Coarse	0.5217	Dry_sub_humid	3380	23.1	59	2513	140	904	28	58	_Mosaic_Vegetation_(grassland,_shrubland,_forest)_(50-70%)_/_Cropland_(20-50%)__	LC_3
1S.S.16s	15.0801	-23.7852	Namibia	6.7	Neutral	Neutral	1.6	2.52	1.03	9.88	0.18	0	0.036428644	99.808	0.096	0.096	Sand	Coarse	0.0121	Hyper_arid	1040	19.8	69	2085	88	30	0	81	_Bare_areas	LC19
C14.10.A	15.36105	-23.245217	Namibia	7.8	Alkaline	Slightly_alkaline	12.86	91.42	6.74	23.6	0.49	0.02	0.09	76.6	1.9	21.5	Sandy_clay_loam	Mod_fine	0.0303	Arid	755	20	71	2341	77	73	0	111	_Bare_areas	LC_19
C14.10.B	15.360583	-23.245867	Namibia	7.8	Alkaline	Slightly_alkaline	12.17	76.71	4.56	19.06	0.56	0.02	0.19	77.1	3.3	19.6	Sandy_clay_loam	Mod_fine	0.0303	Arid	828	20	71	2341	77	73	0	111	_Bare_areas	LC_19
C14.10.C	15.360083	-23.246783	Namibia	7.7	Alkaline	Slightly_alkaline	9.89	97.54	4.72	20.12	0.39	0.03	0.22	84.2	1.7	14.1	Loamy_sand	Coarse	0.0303	Arid	828	20	71	2341	77	73	0	111	_Bare_areas	LC_19
C14.10.D	15.359967	-23.247533	Namibia	7.7	Alkaline	Slightly_alkaline	8.1	85.66	4.4	13.12	0.49	0.03	0.18	86.6	0	13.4	Loamy_sand	Coarse	0.0303	Arid	828	20	71	2341	77	73	0	111	_Bare_areas	LC_19
C14.12.A	15.533867	-23.309733	Namibia	7.6	Alkaline	Slightly_alkaline	16.21	88.41	5.52	12.61	0.46	0.04	0.29	72.2	6.7	21.1	Sandy_clay_loam	Mod_fine	0.0421	Arid	960	19.5	71	2529	70	114	0	125	_Bare_areas	LC_19
C14.12.B	15.533867	-23.31055	Namibia	7.6	Alkaline	Slightly_alkaline	10.07	70.91	3.73	6.51	0.37	0.04	0.19	71.4	6.8	21.9	Sandy_clay_loam	Mod_fine	0.0421	Arid	960	19.5	71	2529	70	114	0	125	_Bare_areas	LC_19
C14.12.C	15.5338	-23.312317	Namibia	7.3	Neutral	Neutral	12.72	763.62	8.07	13.54	0.52	0.03	0.13	82.8	5	12.2	Loamy_sand	Coarse	0.0421	Arid	960	19.5	71	2529	70	114	0	125	_Bare_areas	LC_19
C14.12.D	15.5339	-23.309733	Namibia	7.5	Alkaline	Slightly_alkaline	10.88	210.17	6.07	9.64	0.68	0.04	0.3	78.4	3.3	18.2	Loamy_sand	Coarse	0.0421	Arid	960	19.5	71	2529	70	114	0	125	_Bare_areas	LC_19
C14.14.A	15.714067	-23.324033	Namibia	7.6	Alkaline	Slightly_alkaline	40.76	44.01	7.96	20.85	0.82	0.04	0.24	78.3	5	16.6	Loamy_sand	Coarse	0.045	Arid	868	20.1	70	2714	72	128	0	128	_Bare_areas	LC_19
C14.14.B	15.7141	-23.32445	Namibia	7.6	Alkaline	Slightly_alkaline	11.04	47.13	6.96	15.61	0.56	0.03	0.17	77.6	6.8	15.6	Loamy_sand	Coarse	0.045	Arid	868	20.1	70	2714	72	128	0	128	_Bare_areas	LC_19
C14.14.C	15.714433	-23.325883	Namibia	7.6	Alkaline	Slightly_alkaline	12.32	48.99	7.89	8.58	0.78	0.03	0.16	88.9	3.9	7.2	Sand	Coarse	0.0451	Arid	964	20.1	69	2687	72	128	0	128	_Bare_areas	LC_19
C14.14.D	15.714267	-23.326733	Namibia	7.5	Alkaline	Slightly_alkaline	8.93	49.92	8.03	6.45	0.56	0.04	0.13	89.6	2.7	7.7	Sand	Coarse	0.0451	Arid	964	20.1	69	2687	72	128	0	128	_Bare_areas	LC_19
C14.16.A	15.863467	-23.32035	Namibia	7.5	Alkaline	Slightly_alkaline	8.92	47.88	6.92	4.63	0.99	0.07	0.64	50.5	4	45.5	Sandy_clay	Fine	0.0526	Arid	843	19.9	68	2884	67	159	0	122	_Closed_to_open_(>15%)_grassland	LC_13
C14.16.B	15.862667	-23.320417	Namibia	7.7	Alkaline	Slightly_alkaline	12.75	80.72	11.81	13.82	0.49	0.05	0.38	71.9	3.3	24.7	Sandy_clay_loam	Mod_fine	0.0526	Arid	843	19.9	68	2884	67	159	0	122	_Closed_to_open_(>15%)_grassland	LC_13
C14.16.C	15.8617	-23.32065	Namibia	7.3	Neutral	Neutral	7.9	65.16	11.21	4.9	0.56	0.07	0.7	71.9	4.8	23.3	Sandy_clay_loam	Mod_fine	0.0526	Arid	794	19.9	68	2884	67	159	0	122	_Closed_to_open_(>15%)_grassland	LC_13
C14.16.D	15.860917	-23.32075	Namibia	7.6	Alkaline	Slightly_alkaline	8.41	59.19	11.03	8.39	0.58	0.06	0.91	71.3	3.4	25.3	Sandy_clay_loam	Mod_fine	0.0526	Arid	794	19.9	68	2884	67	159	0	122	_Closed_to_open_(>15%)_grassland	LC_13
C14.18.A	16.00975	-23.344633	Namibia	7.6	Alkaline	Slightly_alkaline	57.59	35.22	7.44	5.33	1.26	0.04	0.36	84.9	4	11.1	Loamy_sand	Coarse	0.0637	Arid	407	19.6	66	3097	60	185	0	122	_Closed_to_open_(>15%)_grassland	LC_13
C14.18.B	16.010167	-23.34525	Namibia	7.8	Alkaline	Slightly_alkaline	19.57	21.58	5.39	3.61	1.66	0.04	0.23	87	3.4	9.7	Loamy_sand	Coarse	0.0637	Arid	407	19.6	66	3097	60	185	0	122	_Closed_to_open_(>15%)_grassland	LC_13
C14.18.C	16.000867	-23.3459	Namibia	7.4	Alkaline	Slightly_alkaline	11.36	28.28	5.6	4.52	1.31	0.02	0.07	95	2.5	2.5	Sand	Coarse	0.0633	Arid	460	19.6	66	3094	60	184	0	121	_Closed_to_open_(>15%)_grassland	LC_13
C14.18.D	16.011517	-23.346333	Namibia	7.2	Neutral	Neutral	16.87	30.5	8.51	4.01	2.33	0.01	0.16	96	3.5	0.5	Sand	Coarse	0.0637	Arid	930	19.6	66	3097	60	185	0	122	_Closed_to_open_(>15%)_grassland	LC_13
C14.20.A	16.1427	-23.244717	Namibia	7.2	Neutral	Neutral	11.64	27.85	6.14	3.16	1.32	0.05	0.57	64.7	4.6	30.7	Sandy_clay_loam	Mod_fine	0.0775	Arid	607	19.1	64	3247	51	212	0	124	_Closed_to_open_(>15%)_grassland	LC_13
C14.20.B	16.143333	-23.24525	Namibia	7.3	Neutral	Neutral	6.87	33.77	3.09	2.37	1.08	0.06	0.62	85.2	4.6	10.3	Loamy_sand	Coarse	0.0775	Arid	607	19.1	64	3247	51	212	0	124	_Closed_to_open_(>15%)_grassland	LC_13
C14.20.C	16.144633	-23.245833	Namibia	7.4	Alkaline	Slightly_alkaline	9.06	44.78	4.85	2.61	1.97	0.06	0.52	87.4	1.7	10.9	Loamy_sand	Coarse	0.0775	Arid	648	19.1	64	3247	51	212	0	124	_Closed_to_open_(>15%)_grassland	LC_13
C14.20.D	16.144567	-23.246383	Namibia	7.5	Alkaline	Slightly_alkaline	9.6	36.46	3.92	3.05	1.32	0.04	0.25	87.4	3.3	9.3	Loamy_sand	Coarse	0.0775	Arid	1262	19.1	64	3247	51	212	0	124	_Closed_to_open_(>15%)_grassland	LC_13
C14.6.D	15.0394	-23.067217	Namibia	7.3	Neutral	Neutral	17.15	976.11	8.2	78.12	0.53	0.01	0.08	91.1	1.7	7.2	Sand	Coarse	0.0191	Hyper_arid	600	19.4	71	2091	79	36	0	89	_Bare_areas	LC_19
C14.8.B	15.208817	-23.142817	Namibia	7	Neutral	Neutral	242.11	1364.63	86.78	3216.5	0.34	0.03	0.08	87.1	5	7.9	Loamy_sand	Coarse	0.0228	Hyper_arid	569	20	71	2229	80	52	0	107	_Bare_areas	LC_19
C14.8.D	15.2072	-23.143617	Namibia	7.6	Alkaline	Slightly_alkaline	7.39	170.39	3.98	35.69	0.23	0.01	0.04	94.9	0	5.1	Sand	Coarse	0.0224	Hyper_arid	569	20	71	2207	80	51	0	104	_Bare_areas	LC_19
NA1	16.011	-21.495	Namibia	8.18	Alkaline	Moderately_alkaline	89.19	3893.96	125.16	32.04	60.95	0.06	0.51	82	4	14	Loamy_sand	Coarse	0.113	Arid	1546	20.1	64	3137	61	318	0	113	_Closed_to_open_(>15%)_grassland	LC_13
NA10	20.7303	-19.9919	Namibia	6.87	Neutral	Neutral	32.21	935.88	66.17	20.04	6.6	0.02	0.31	83	2	15	Loamy_sand	Coarse	0.1642	Arid	4807	21.4	56	4019	52	448	0	106	_Mosaic_Vegetation_(grassland,_shrubland,_forest)_(50-70%)_/_Cropland_(20-50%)__	LC_3
NA100	18.2219	-20.9653	Namibia	6.37	Acidic	Slightly_acid	19.87	254.98	28.5	17.22	7.56	0.02	0.33	94	0	6	Sand	Coarse	0.1646	Arid	2960	19.9	58	3831	42	426	0	98	_Closed_to_open_(>15%)_grassland	LC_13
NA101	18.2052	-20.5111	Namibia	6.27	Acidic	Slightly_acid	31.13	223.91	42.72	11.72	4.75	0.02	0.36	95	0	5	Sand	Coarse	0.1607	Arid	1934	20.6	58	3769	53	408	0	101	_Closed_to_open_(>15%)_grassland	LC_13
NA102	18.2712	-20.0635	Namibia	6.85	Neutral	Neutral	23.53	426.66	29.37	11.88	11.09	0.02	0.35	95	0	5	Sand	Coarse	0.1653	Arid	2995	21	57	3760	62	426	0	106	_Closed_to_open_(>15%)_grassland	LC_13
NA103	18.5812	-19.6594	Namibia	8.5	Alkaline	Strongly_alkaline	91	5923.59	1198.64	35.67	33.66	0.11	1.08	86	6	8	Loamy_sand	Coarse	0.171	Arid	2238	21.3	56	3788	66	445	0	106	_Closed_to_open_(>15%)_grassland	LC_13
NA104	17.8199	-19.4347	Namibia	7.9	Alkaline	Moderately_alkaline	290.87	754.34	532.88	48.05	67.44	0.7	6.05	64	27	8	Sandy_loam	Mod_coarse	0.234	Semi_arid	2572	20.9	58	3324	71	599	0	106	_Open_(15-40%)_broadleaved_deciduous_forest_(>5m)	LC_6
NA105	17.3162	-19.6298	Namibia	8.28	Alkaline	Moderately_alkaline	243.88	1147.99	389.93	43.57	13.6	0.21	1.95	45	32	23	Loam	Medium	0.209	Semi_arid	2466	20.4	58	3470	49	541	0	107	_Closed_to_open_(>15%)_grassland	LC_13
NA106	17.04	-20.0018	Namibia	8.1	Alkaline	Moderately_alkaline	273.69	4604.6	239.05	31.1	11.05	0.14	1.17	74	6	20	Sandy_clay_loam	Mod_fine	0.1934	Arid	2185	20.1	61	3460	48	479	0	109	_Closed_to_open_(>15%)_grassland	LC_13
NA107	17.04	-20.0018	Namibia	7.44	Alkaline	Slightly_alkaline	262.35	1466.68	273.97	26.88	19.78	0.11	0.97	77	3	21	Sandy_clay_loam	Mod_fine	0.1934	Arid	2185	20.1	61	3460	48	479	0	109	_Closed_to_open_(>15%)_grassland	LC_13
NA108	16.8068	-23.0479	Namibia	8.42	Alkaline	Moderately_alkaline	107.65	4284.22	94.05	25.82	80.47	0.06	0.5	80	8	12	Loamy_sand	Coarse	0.1179	Arid	1193	18.4	60	3816	32	284	0	110	_Closed_to_open_(>15%)_grassland	LC_13
NA11	18.6925	-19.0388	Namibia	6.77	Neutral	Neutral	109.16	513.23	378.61	26.52	4.37	0.03	0.27	93	0	7	Sand	Coarse	0.1975	Arid	3321	21.9	56	3559	72	502	0	105	_Closed_to_open_(>15%)_grassland	LC_13
NA12	19.1519	-18.5778	Namibia	6.27	Acidic	Slightly_acid	52.41	397.22	114.76	21.39	8.08	0.03	0.31	90	0	10	Sand	Coarse	0.2097	Semi_arid	3039	22	57	3458	68	526	0	107	_Closed_to_open_(>15%)_grassland	LC_13
NA13	19.473	-18.1903	Namibia	7.98	Alkaline	Moderately_alkaline	13.59	3683.15	50.48	24.62	4.08	0.02	0.33	95	0	5	Sand	Coarse	0.2166	Semi_arid	3282	22	56	3451	62	549	0	108	_Closed_to_open_(>15%)_grassland	LC_13
NA14	19.8677	-17.9086	Namibia	8.48	Alkaline	Moderately_alkaline	43	2022.01	98.28	24.6	12.46	0.03	0.25	86	0	14	Loamy_sand	Coarse	0.2217	Semi_arid	2638	22.2	56	3489	59	572	0	109	_Closed_to_open_(>15%)_grassland	LC_13
NA15	20.354	-17.939	Namibia	6.04	Acidic	Moderately_acid	16.01	210.94	37.99	18.12	6.57	0.02	0.33	95	0	5	Sand	Coarse	0.2262	Semi_arid	3839	21.9	56	3405	59	580	0	108	_Closed_to_open_(>15%)_grassland	LC_13
NA16	21.8015	-18.0741	Namibia	6.06	Acidic	Moderately_acid	10.84	287.1	20.02	19.32	4.55	0.02	0.32	93	0	7	Sand	Coarse	0.2225	Semi_arid	2980	21.8	56	3474	61	577	0	107	_Closed_to_open_(>15%)_grassland	LC_13
NA17	22.2994	-18.0201	Namibia	5.98	Acidic	Moderately_acid	28.88	243.2	97.72	11.44	3.95	0.02	0.32	93	2	5	Sand	Coarse	0.2213	Semi_arid	2867	21.9	56	3544	60	559	0	107	_Mosaic_Vegetation_(grassland,_shrubland,_forest)_(50-70%)_/_Cropland_(20-50%)__	LC_3
NA18	22.794	-17.9103	Namibia	6.09	Acidic	Moderately_acid	11.52	387.71	58.95	13.7	5.33	0.02	0.47	98	0	2	Sand	Coarse	0.2298	Semi_arid	3424	21.9	56	3524	60	575	0	109	_Closed_to_open_(>15%)_grassland	LC_13
NA19	23.2558	-17.7861	Namibia	6.06	Acidic	Moderately_acid	30.57	195.59	46.29	16.77	6.28	0.03	0.29	96	0	4	Sand	Coarse	0.2414	Semi_arid	4212	21.9	55	3580	56	600	0	108	_Closed_to_open_(>15%)_shrubland_(<5m)	LC_12
NA2	16.0496	-21.0143	Namibia	8.57	Alkaline	Strongly_alkaline	163.24	6149.55	140.4	34.05	35.46	0.07	0.69	82	2	16	Loamy_sand	Coarse	0.1465	Arid	1360	19	65	3053	49	400	0	112	_Closed_to_open_(>15%)_grassland	LC_13
NA20	23.7397	-17.8113	Namibia	6.13	Acidic	Slightly_acid	36.23	355.62	102.46	14.63	4.02	0.02	0.33	90	0	10	Sand	Coarse	0.2462	Semi_arid	4332	21.7	55	3668	52	614	0	110	_Closed_to_open_(>15%)_shrubland_(<5m)	LC_12
NA21	24.1886	-17.636	Namibia	6.01	Acidic	Moderately_acid	43.3	637.46	179.91	16.51	9.85	0.04	0.45	92	0	8	Sand	Coarse	0.2646	Semi_arid	4394	21.5	54	3749	45	661	0	111	_Closed_to_open_(>15%)_shrubland_(<5m)	LC_12
NA22	24.7048	-17.7675	Namibia	9.11	Alkaline	Very_strongly_alkaline	90.37	1780.59	199.91	330.18	11.16	0.05	0.56	83	8	9	Loamy_sand	Coarse	0.2438	Semi_arid	3311	22.2	55	3453	62	632	0	111	_Closed_to_open_(>15%)_grassland	LC_13
NA23	21.3213	-18.0303	Namibia	5.5	Acidic	Strongly_acid	9.92	131.55	25.48	8.88	3.57	0.02	0.34	95	0	5	Sand	Coarse	0.2345	Semi_arid	3696	21.6	56	3280	63	594	0	109	_Closed_to_open_(>15%)_grassland	LC_13
NA24	20.8385	-18.0596	Namibia	7.19	Neutral	Neutral	178.14	5525.13	283.88	36.19	11.41	0.22	2.4	80	8	12	Loamy_sand	Coarse	0.2319	Semi_arid	3423	21.8	56	3382	61	590	0	109	_Closed_to_open_(>15%)_grassland	LC_13
NA25	19.3847	-17.8673	Namibia	8.04	Alkaline	Moderately_alkaline	50.57	912.6	80.11	15.85	35.4	0.02	0.33	92	0	8	Sand	Coarse	0.2229	Semi_arid	3098	22.5	57	3374	65	542	0	105	_Closed_to_open_(>15%)_grassland	LC_13
NA26	18.891	-17.8193	Namibia	7.93	Alkaline	Moderately_alkaline	80.85	895.91	174.74	16.53	6.77	0.02	0.25	92	2	6	Sand	Coarse	0.2348	Semi_arid	2769	22.8	59	3209	73	547	0	104	_Closed_to_open_(>15%)_grassland	LC_13
NA27	18.4122	-17.7385	Namibia	5.95	Acidic	Moderately_acid	14.96	142.67	45.36	7.96	4.5	0.01	0.31	93	0	7	Sand	Coarse	0.2456	Semi_arid	3077	22.9	59	3101	75	598	0	103	_Mosaic_Vegetation_(grassland,_shrubland,_forest)_(50-70%)_/_Cropland_(20-50%)__	LC_3
NA28	17.9091	-17.6146	Namibia	6.19	Acidic	Slightly_acid	17.64	165.94	45.43	8.65	7.88	0.02	0.27	95	0	5	Sand	Coarse	0.2528	Semi_arid	5233	22.8	59	3180	72	608	0	103	_Closed_to_open_(>15%)_grassland	LC_13
NA29	17.4203	-17.6252	Namibia	5.76	Acidic	Moderately_acid	6.28	83.55	18.37	11.12	3.05	0.01	0.23	93	1	6	Sand	Coarse	0.2466	Semi_arid	3582	22.8	59	3219	69	587	0	105	_Closed_to_open_(>15%)_shrubland_(<5m)	LC_12
NA3	16.1389	-20.5439	Namibia	7.86	Alkaline	Slightly_alkaline	254.17	1512.31	260.39	28.63	20.87	0.08	0.4	86	1	13	Loamy_sand	Coarse	0.1387	Arid	1307	20.9	65	3017	63	389	0	113	_Closed_to_open_(>15%)_grassland	LC_13
NA30	16.8978	-17.5867	Namibia	5.66	Acidic	Moderately_acid	11.48	85.83	16.85	9.31	2.86	0.01	0.22	96	0	4	Sand	Coarse	0.2405	Semi_arid	3585	22.8	58	3274	66	565	0	104	_Mosaic_Vegetation_(grassland,_shrubland,_forest)_(50-70%)_/_Cropland_(20-50%)__	LC_3
NA31	16.4272	-17.4721	Namibia	5.34	Acidic	Strongly_acid	4.9	78.48	12.46	8.23	2.42	0.01	0.2	96	0	4	Sand	Coarse	0.2386	Semi_arid	2649	22.8	58	3305	63	554	0	105	_Mosaic_Vegetation_(grassland,_shrubland,_forest)_(50-70%)_/_Cropland_(20-50%)__	LC_3
NA32	15.9554	-17.5155	Namibia	7.19	Neutral	Neutral	53.26	1241.62	115.73	18.48	7.31	0.03	0.3	92	1	7	Sand	Coarse	0.2264	Semi_arid	2269	22.6	58	3282	63	539	0	107	_Closed_to_open_(>15%)_grassland	LC_13
NA33	15.4751	-17.4672	Namibia	6.59	Neutral	Neutral	16.83	168.19	33.97	10.13	6.91	0.01	0.11	95	0	5	Sand	Coarse	0.2197	Semi_arid	1921	22.7	58	3229	67	530	0	108	_Closed_to_open_(>15%)_grassland	LC_13
NA34	14.9457	-17.4943	Namibia	8.4	Alkaline	Moderately_alkaline	79.03	1977.07	267.65	72.67	7.14	0.03	0.31	85	2	13	Loamy_sand	Coarse	0.1787	Arid	1516	22.7	59	3060	77	440	0	115	_Closed_to_open_(>15%)_grassland	LC_13
NA35	14.4292	-17.4129	Namibia	7.15	Neutral	Neutral	24.74	397.06	43.54	14.14	9.79	0.02	0.27	93	0	7	Sand	Coarse	0.1841	Arid	2169	22.2	60	2783	85	381	0	124	_Closed_to_open_(>15%)_grassland	LC_13
NA36	13.8955	-17.3627	Namibia	9.21	Alkaline	Very_strongly_alkaline	643.81	14081.95	531.75	3614.56	49.74	0.07	0.63	61	17	22	Sandy_clay_loam	Mod_fine	0.1259	Arid	1013	22.7	61	2445	108	276	0	121	_Closed_to_open_(>15%)_grassland	LC_13
NA37	15.0562	-17.9429	Namibia	7.35	Neutral	Neutral	67.21	662.41	83.1	26.94	6.67	0.04	0.49	91	0	9	Sand	Coarse	0.179	Arid	2035	22.6	59	3174	75	439	0	113	_Closed_to_open_(>15%)_grassland	LC_13
NA38	15.443	-18.209	Namibia	6.27	Acidic	Slightly_acid	32.1	144.94	68.71	24.1	4.54	0.01	0.22	94	0	6	Sand	Coarse	0.1705	Arid	2173	22.6	58	3318	70	424	0	110	_Closed_to_open_(>15%)_grassland	LC_13
NA39	16.807	-18.5398	Namibia	7.19	Neutral	Neutral	71.37	293.84	142.79	122.81	7.74	0.04	0.51	93	0	7	Sand	Coarse	0.1887	Arid	2168	22.9	59	3429	70	467	0	110	_Closed_to_open_(>15%)_grassland	LC_13
NA4	16.0572	-19.9819	Namibia	8.2	Alkaline	Moderately_alkaline	360.11	5568.64	317.3	65.6	10.69	0.06	0.54	71	5	24	Sandy_clay_loam	Mod_fine	0.1545	Arid	1492	21.2	63	3082	61	404	0	108	_Closed_to_open_(>15%)_grassland	LC_13
NA40	17.4746	-18.7073	Namibia	6.93	Neutral	Neutral	61.63	739.47	212.94	19.74	7.81	0.04	0.37	91	0	9	Sand	Coarse	0.2046	Semi_arid	2499	22.8	58	3323	77	522	0	105	_Closed_to_open_(>15%)_shrubland_(<5m)	LC_12
NA41	16.6492	-19.0022	Namibia	7.92	Alkaline	Moderately_alkaline	194.13	5264.06	1019.2	45.67	32.03	0.3	2.02	50	33	17	Loam	Medium	0.1777	Arid	1977	22.7	60	3507	68	457	0	107	_Closed_to_open_(>15%)_grassland	LC_13
NA42	16.1106	-19.1044	Namibia	8.12	Alkaline	Moderately_alkaline	247.36	9815.93	1609.96	105.38	209.54	0.31	2.88	51	40	8	Loam	Medium	0.1502	Arid	1840	22.5	60	3727	63	412	0	109	_Closed_to_open_(>15%)_grassland	LC_13
NA43	15.8924	-19.5801	Namibia	8.1	Alkaline	Moderately_alkaline	320.25	5772.32	609.47	42.69	18.99	0.25	2.39	62	28	10	Sandy_loam	Mod_coarse	0.1443	Arid	1824	21.7	61	3383	62	404	0	108	_Closed_to_open_(>15%)_grassland	LC_13
NA44	15.8551	-21.9629	Namibia	8.78	Alkaline	Strongly_alkaline	71.61	4950.64	247.86	25.98	38.23	0.03	0.25	89	3	8	Sand	Coarse	0.0828	Arid	1277	21.8	66	2985	87	236	0	123	_Closed_to_open_(>15%)_grassland	LC_13
NA45	16.367	-22.101	Namibia	6.93	Neutral	Neutral	64.31	500.69	79.74	18.75	103.94	0.04	0.32	83	8	8	Loamy_sand	Coarse	0.1104	Arid	1459	20	63	3432	53	308	0	120	_Closed_to_open_(>15%)_grassland	LC_13
NA46	16.678	-22.4701	Namibia	6.49	Acidic	Slightly_acid	220.73	654.53	88.41	20.02	87.64	0.09	0.78	81	11	8	Loamy_sand	Coarse	0.1395	Arid	1195	18.3	62	3486	35	362	0	109	_Closed_to_open_(>15%)_grassland	LC_13
NA47	16.7474	-23.511	Namibia	8.86	Alkaline	Strongly_alkaline	85.92	4883.53	131.22	26.68	49.83	0.04	0.32	79	13	8	Loamy_sand	Coarse	0.1039	Arid	1277	17.8	58	4146	23	254	0	116	_Closed_to_open_(>15%)_grassland	LC_13
NA48	16.5593	-23.9304	Namibia	8.44	Alkaline	Moderately_alkaline	139.95	4930.38	185.16	31.56	41.42	0.07	0.49	72	16	12	Loamy_sand	Coarse	0.0906	Arid	938	17.2	58	4136	21	236	0	129	_Closed_to_open_(>15%)_grassland	LC_13
NA49	16.7288	-24.3608	Namibia	7.79	Alkaline	Slightly_alkaline	88.43	1071.68	187.21	27.08	49.82	0.05	0.13	75	13	12	Loamy_sand	Coarse	0.074	Arid	649	16.9	59	3868	24	181	0	121	_Sparse_(>15%)_vegetation_(woody_vegetation,_shrubs,_grassland)	LC_14
NA5	18.2989	-19.3889	Namibia	8.89	Alkaline	Strongly_alkaline	92.42	6257.72	234.1	36.13	15.38	0.09	0.89	78	7	16	Loamy_sand	Coarse	0.1994	Arid	2503	21.3	56	3597	72	479	0	105	_Open_(15-40%)_broadleaved_deciduous_forest_(>5m)	LC_6
NA50	16.9591	-24.7783	Namibia	8.13	Alkaline	Moderately_alkaline	148.63	3344.02	155.14	29.24	67.74	0.05	0.34	80	10	10	Loamy_sand	Coarse	0.0763	Arid	1239	17	57	4071	23	172	0	119	_Closed_to_open_(>15%)_grassland	LC_13
NA51	16.6934	-25.1953	Namibia	8.49	Alkaline	Moderately_alkaline	459.14	2870.28	297.37	55.72	197.52	0.06	0.49	58	22	20	Sandy_loam	Mod_coarse	0.0738	Arid	1068	16	57	3908	24	163	1	115	_Closed_to_open_(>15%)_grassland	LC_13
NA52	16.3121	-25.4976	Namibia	8.01	Alkaline	Moderately_alkaline	267.12	1335.07	217.19	33.28	99.44	0.05	0.37	83	5	12	Loamy_sand	Coarse	0.0526	Arid	1034	15.7	57	3534	35	124	2	101	_Closed_to_open_(>15%)_grassland	LC_13
NA53	16.0934	-25.9135	Namibia	7.32	Neutral	Neutral	107.15	431.84	183.41	24.24	38.4	0.01	0.1	91	1	8	Sand	Coarse	0.0327	Arid	1114	16.1	57	3246	52	80	2	90	_Bare_areas	LC_19
NA54	16.5338	-26.2093	Namibia	7.07	Neutral	Neutral	60.48	448.04	156.86	19.04	23.28	0.01	0.19	84	2	14	Loamy_sand	Coarse	0.0478	Arid	1153	16.3	54	3912	39	115	2	105	_Bare_areas	LC_19
NA55	16.3095	-26.647	Namibia	7.1	Neutral	Neutral	67.57	326.57	147.27	19.08	32.46	0.01	0.13	86	7	8	Loamy_sand	Coarse	0.057	Arid	1426	13.8	53	3863	20	134	3	51	_Bare_areas	LC_19
NA56	15.7377	-26.5706	Namibia	8.49	Alkaline	Moderately_alkaline	68.51	4859.07	130.97	39.73	22.09	0	0.06	92	0	8	Sand	Coarse	0.0169	Hyper_arid	895	15.8	58	2447	73	38	1	47	_Bare_areas	LC_19
NA57	15.1158	-26.6925	Namibia	8.54	Alkaline	Strongly_alkaline	142.17	5477.51	439.47	105.07	43.86	0.01	0.15	88	0	12	Sand	Coarse	0.0111	Hyper_arid	465	15.6	62	1430	99	19	0	43	_Bare_areas	LC_19
NA58	16.4088	-27.0962	Namibia	9.03	Alkaline	Strongly_alkaline	77.09	2144.64	151.6	35.13	32.97	0.01	0.08	98	0	2	Sand	Coarse	0.0334	Arid	833	15.5	55	3440	45	84	2	41	_Bare_areas	LC_19
NA59	16.7321	-27.4586	Namibia	9.08	Alkaline	Strongly_alkaline	83.11	16712.19	98.2	50.72	14.74	0.03	0.13	87	5	8	Loamy_sand	Coarse	0.033	Arid	605	16	56	3455	47	83	2	43	_Closed_to_open_(>15%)_grassland	LC_13
NA6	19.0442	-19.3041	Namibia	7.8	Alkaline	Slightly_alkaline	78.17	890.06	250.84	24.78	6.68	0.04	0.32	89	1	10	Loamy_sand	Coarse	0.186	Arid	3023	21.6	56	3684	66	477	0	107	_Closed_to_open_(>15%)_grassland	LC_13
NA60	16.7195	-27.9209	Namibia	8.88	Alkaline	Strongly_alkaline	75.75	3119.32	229.72	37.06	95.35	0.01	0.26	82	10	8	Loamy_sand	Coarse	0.0226	Hyper_arid	441	17	59	2862	66	60	2	35	_Sparse_(>15%)_vegetation_(woody_vegetation,_shrubs,_grassland)	LC_14
NA62	17.9937	-28.4439	Namibia	9.3	Alkaline	Very_strongly_alkaline	196.56	4069.68	151.48	74.78	52.87	0.03	0.06	82	6	12	Loamy_sand	Coarse	0.028	Hyper_arid	346	20.3	55	4821	48	79	3	60	_Sparse_(>15%)_vegetation_(woody_vegetation,_shrubs,_grassland)	LC_14
NA63	18.5106	-28.3935	Namibia	8.64	Alkaline	Strongly_alkaline	199.58	4536.98	184.02	44.32	101.41	0.03	0.08	77	11	12	Loamy_sand	Coarse	0.0434	Arid	852	19.4	57	5170	31	117	3	71	_Bare_areas	LC_19
NA64	18.7536	-27.9478	Namibia	8.9	Alkaline	Strongly_alkaline	258.17	3799.32	506.79	105.23	98.55	0.03	0.01	72	12	16	Loamy_sand	Coarse	0.0488	Arid	705	18.8	57	5016	24	124	2	92	_Sparse_(>15%)_vegetation_(woody_vegetation,_shrubs,_grassland)	LC_14
NA65	19.0688	-27.5818	Namibia	9.03	Alkaline	Strongly_alkaline	112.03	4519.42	116.94	44.17	77.56	0.01	0.13	90	3	8	Sand	Coarse	0.0621	Arid	947	18.6	56	5126	19	153	1	94	_Sparse_(>15%)_vegetation_(woody_vegetation,_shrubs,_grassland)	LC_14
NA66	19.4524	-27.2834	Namibia	9.36	Alkaline	Very_strongly_alkaline	157.44	2014.07	134.61	97.41	164.95	0.01	0.17	85	7	8	Loamy_sand	Coarse	0.0524	Arid	1863	20.1	55	5357	26	131	0	96	_Closed_to_open_(>15%)_grassland	LC_13
NA67	19.5709	-26.8434	Namibia	8.85	Alkaline	Strongly_alkaline	114.99	6345.92	144	35.07	36.45	0.02	0.06	85	3	12	Loamy_sand	Coarse	0.0628	Arid	1280	19.6	54	5514	15	165	0	94	_Closed_to_open_(>15%)_grassland	LC_13
NA68	19.0778	-26.5726	Namibia	8.94	Alkaline	Strongly_alkaline	113.56	7507.86	42.27	45.76	60.1	0.03	0.12	60	24	16	Sandy_loam	Mod_coarse	0.0572	Arid	1014	20.1	55	5321	25	152	0	98	_Closed_to_open_(>15%)_grassland	LC_13
NA69	18.5705	-26.5888	Namibia	8.92	Alkaline	Strongly_alkaline	142.77	2402.6	114.22	39.49	83.44	0.04	0.12	81	11	8	Loamy_sand	Coarse	0.0505	Arid	606	21	55	4985	47	134	0	98	_Sparse_(>15%)_vegetation_(woody_vegetation,_shrubs,_grassland)	LC_14
NA7	19.5504	-19.3707	Namibia	6.65	Neutral	Neutral	13.95	251.91	36.37	18.97	7.95	0.02	0.18	94	1	5	Sand	Coarse	0.1845	Arid	2774	21.5	56	3751	61	480	0	106	_Closed_to_open_(>15%)_grassland	LC_13
NA70	18.0658	-26.4885	Namibia	8.86	Alkaline	Strongly_alkaline	114.97	4837.04	125.59	61.92	53.83	0.02	0.04	83	5	12	Loamy_sand	Coarse	0.0562	Arid	368	20.6	56	4575	57	151	0	104	_Closed_to_open_(>15%)_grassland	LC_13
NA71	18.1399	-26.0169	Namibia	8.86	Alkaline	Strongly_alkaline	103.4	6516.8	33.62	46.25	31.85	0.06	0.01	68	20	12	Sandy_loam	Mod_coarse	0.059	Arid	631	20.7	56	4709	51	170	0	102	_Sparse_(>15%)_vegetation_(woody_vegetation,_shrubs,_grassland)	LC_14
NA72	17.9801	-25.5866	Namibia	8.01	Alkaline	Moderately_alkaline	271.12	8755.61	144.67	833.55	38.26	0	0.06	47	38	16	Loam	Medium	0.0736	Arid	722	20.2	56	4603	44	212	0	101	_Closed_to_open_(>15%)_grassland	LC_13
NA73	17.9801	-25.5866	Namibia	8.78	Alkaline	Strongly_alkaline	328.75	5199.48	306.02	100.33	70.82	0.03	0.24	63	17	20	Sandy_loam	Mod_coarse	0.0736	Arid	722	20.2	56	4603	44	212	0	101	_Closed_to_open_(>15%)_grassland	LC_13
NA74	17.2051	-22.5392	Namibia	5.76	Acidic	Moderately_acid	58.14	180.26	39.2	21.39	18.01	0.06	0.55	91	0	9	Sand	Coarse	0.1636	Arid	1303	17.8	59	3791	26	399	0	104	_Closed_to_open_(>15%)_grassland	LC_13
NA75	17.6611	-22.3749	Namibia	6.85	Neutral	Neutral	96.31	675.44	72.85	26.6	18.46	0.05	0.48	85	3	12	Loamy_sand	Coarse	0.1527	Arid	1679	18.6	58	4078	27	363	0	99	_Closed_to_open_(>15%)_grassland	LC_13
NA76	18.1546	-22.3535	Namibia	6.95	Neutral	Neutral	103.39	721.29	97.95	27.3	17.12	0.03	0.32	89	1	10	Loamy_sand	Coarse	0.1432	Arid	1568	18.9	57	4092	25	356	0	96	_Closed_to_open_(>15%)_grassland	LC_13
NA77	18.6513	-22.3867	Namibia	7.19	Neutral	Neutral	63.6	852.18	49.66	21.83	9.95	0.02	0.19	91	0	9	Sand	Coarse	0.1407	Arid	1833	19.2	57	4282	23	354	0	91	_Closed_to_open_(>15%)_grassland	LC_13
NA78	19.1841	-22.3727	Namibia	6.51	Acidic	Slightly_acid	69.09	374.46	91.14	17.75	5.59	0.04	0.37	91	0	9	Sand	Coarse	0.1443	Arid	2119	19	56	4418	20	381	1	89	_Closed_to_open_(>15%)_grassland	LC_13
NA79	20.986	-21.941	Namibia	6.68	Neutral	Neutral	30.58	290.35	79.1	13.61	6.57	0.02	0.1	95	0	5	Sand	Coarse	0.1376	Arid	2470	20.5	58	4394	36	395	1	92	_Closed_to_open_(>15%)_grassland	LC_13
NA8	20.0282	-19.4795	Namibia	6.47	Acidic	Slightly_acid	8.84	288.98	22.33	15.59	4.81	0.02	0.27	96	0	4	Sand	Coarse	0.1863	Arid	3287	21.3	56	3819	56	479	0	109	_Closed_to_open_(>15%)_grassland	LC_13
NA80	20.5176	-21.8174	Namibia	6.19	Acidic	Slightly_acid	16.89	177.84	38.66	11.76	4.41	0.01	0.17	96	0	4	Sand	Coarse	0.137	Arid	3482	20.4	57	4402	34	385	1	88	_Closed_to_open_(>15%)_grassland	LC_13
NA81	20.0561	-21.9702	Namibia	6.02	Acidic	Moderately_acid	38.83	210.98	45.7	12.92	5.3	0.02	0.13	95	0	5	Sand	Coarse	0.1365	Arid	3299	20.1	57	4396	31	372	2	83	_Closed_to_open_(>15%)_grassland	LC_13
NA82	19.652	-22.2448	Namibia	7.02	Neutral	Neutral	52.5	630.82	124.91	16.53	4.25	0.03	0.26	92	0	8	Sand	Coarse	0.1428	Arid	2735	19.2	56	4433	22	380	2	84	_Closed_to_open_(>15%)_grassland	LC_13
NA83	18.9373	-22.8527	Namibia	6.95	Neutral	Neutral	38.54	401.55	42.97	14.99	7.68	0.02	0.21	94	0	6	Sand	Coarse	0.1205	Arid	1977	19.3	57	4447	20	321	1	91	_Closed_to_open_(>15%)_grassland	LC_13
NA84	19.0322	-23.2985	Namibia	2.01	Acidic	Extremely_acid	37.79	284.35	44	13.73	17.64	0.03	0.24	92	0	8	Sand	Coarse	0.1063	Arid	2080	19.3	57	4446	18	284	1	93	_Closed_to_open_(>15%)_grassland	LC_13
NA85	18.565	-23.484	Namibia	7.02	Neutral	Neutral	47.37	431.08	129.98	15.19	17.06	0.02	0.28	92	0	8	Sand	Coarse	0.0976	Arid	1499	19.7	57	4479	21	251	1	94	_Closed_to_open_(>15%)_grassland	LC_13
NA86	18.565	-23.484	Namibia	5.34	Acidic	Strongly_acid	91.67	224.81	61.96	19.87	66.94	0.04	0.3	82	0	18	Sandy_clay_loam	Mod_fine	0.0976	Arid	1499	19.7	57	4479	21	251	1	94	_Closed_to_open_(>15%)_grassland	LC_13
NA88	18.2	-24.0837	Namibia	8.86	Alkaline	Strongly_alkaline	233.39	7968.44	168.08	68.59	49.57	0.02	0.01	73	13	14	Loamy_sand	Coarse	0.0875	Arid	642	19.9	55	5108	19	234	0	109	_Sparse_(>15%)_vegetation_(woody_vegetation,_shrubs,_grassland)	LC_14
NA89	18.5151	-24.4815	Namibia	8.59	Alkaline	Strongly_alkaline	48.01	1219.04	191.75	19.54	31.77	0.02	0.17	93	0	8	Sand	Coarse	0.0869	Arid	1517	20.1	55	5212	19	238	0	107	_Closed_to_open_(>15%)_grassland	LC_13
NA9	20.5737	-19.5882	Namibia	6.95	Neutral	Neutral	44.29	953.46	98.02	23.7	7.72	0.02	0.33	92	1	7	Sand	Coarse	0.1789	Arid	2599	21.5	56	3881	55	470	0	108	_Closed_to_open_(>15%)_grassland	LC_13
NA90	20.5737	-19.5882	Namibia	8.96	Alkaline	Strongly_alkaline	362.72	7023	649.32	119.57	44.32	0.08	0.66	77	13	10	Loamy_sand	Coarse	0.1789	Arid	2599	21.5	56	3881	55	470	0	108	_Closed_to_open_(>15%)_grassland	LC_13
NA91	19.2319	-25.1384	Namibia	8.78	Alkaline	Strongly_alkaline	78.83	2008.01	242.05	21.06	53.6	0.03	0.24	89	3	8	Sand	Coarse	0.0816	Arid	1441	20.1	53	5502	12	206	0	90	_Closed_to_open_(>15%)_grassland	LC_13
NA92	19.8829	-25.1076	Namibia	7.35	Neutral	Neutral	27.74	118.28	57.07	14.19	10.29	0.01	0.06	95	0	5	Sand	Coarse	0.0857	Arid	1816	20	54	5549	6	220	1	90	_Closed_to_open_(>15%)_grassland	LC_13
NA93	19.6959	-24.6788	Namibia	6.36	Acidic	Slightly_acid	27.68	176.37	39.5	14.63	12.64	0.01	0.13	94	0	6	Sand	Coarse	0.087	Arid	1637	19.9	55	5187	11	221	0	88	_Closed_to_open_(>15%)_grassland	LC_13
NA95	19.2294	-23.7838	Namibia	7.44	Alkaline	Slightly_alkaline	34.75	358.2	99.98	15.65	13.05	0.01	0.1	94	0	6	Sand	Coarse	0.0909	Arid	1782	19.6	57	4497	17	247	0	101	_Closed_to_open_(>15%)_grassland	LC_13
NA96	18.5327	-21.946	Namibia	6.93	Neutral	Neutral	93.46	501.05	94.14	18.15	15.8	0.04	0.33	89	1	10	Loamy_sand	Coarse	0.162	Arid	1843	18.9	57	4122	25	406	0	94	_Closed_to_open_(>15%)_grassland	LC_13
NA97	18.0994	-21.7034	Namibia	6.93	Neutral	Neutral	130.53	1270.96	247.33	23.21	16.74	0.06	0.57	78	5	16	Loamy_sand	Coarse	0.1793	Arid	2120	18.4	59	3894	25	447	0	95	_Closed_to_open_(>15%)_grassland	LC_13
NA98	17.8746	-21.2992	Namibia	8.18	Alkaline	Moderately_alkaline	94.76	5322.98	262.98	31.17	22.31	0.09	0.72	85	4	10	Loamy_sand	Coarse	0.1625	Arid	2166	19.5	59	3739	38	408	0	98	_Closed_to_open_(>15%)_grassland	LC_13
NA99	18.6889	-21.1126	Namibia	6.68	Neutral	Neutral	18.28	153.56	28.31	12.51	6.87	0.02	0.21	93	0	7	Sand	Coarse	0.1758	Arid	2415	19.7	57	3970	38	454	1	97	_Closed_to_open_(>15%)_grassland	LC_13
NDLS18	13.33171	-18.25286	Namibia	8.71	Alkaline	Strongly_alkaline	69.56	879.54	516.25	18.7	57.47	0.04	0.25	75	15	10	Loamy_sand	Coarse	0.0793	Arid	1126	21.2	60	2176	113	177	0	114	_Closed_to_open_(>15%)_grassland	LC_13
NDLS19	12.87157	-18.28753	Namibia	8.61	Alkaline	Strongly_alkaline	135.59	2170.56	186.28	23.62	68.72	0.04	0.37	78	12	10	Loamy_sand	Coarse	0.0609	Arid	796	19.3	61	1973	108	124	0	114	_Sparse_(>15%)_vegetation_(woody_vegetation,_shrubs,_grassland)	LC_14
NDLS20	12.5751	-17.94808	Namibia	8.42	Alkaline	Moderately_alkaline	84.64	2732.58	135.02	29.58	43.7	0.05	0.33	74	14	12	Loamy_sand	Coarse	0.0753	Arid	1019	17.8	62	1891	96	149	0	111	_Closed_to_open_(>15%)_grassland	LC_13
NDLS21	12.46108	-17.50739	Namibia	7.72	Alkaline	Slightly_alkaline	31.94	427.34	112.14	11.74	38.33	0.01	0.16	94	0	6	Sand	Coarse	0.0465	Arid	1149	19.4	59	1952	116	90	0	119	_Closed_to_open_(>15%)_grassland	LC_13
NDLS22	12.15315	-17.8218	Namibia	9.33	Alkaline	Very_strongly_alkaline	201.01	3783.49	214.54	126.42	134.45	0.01	0.16	85	5	10	Loamy_sand	Coarse	0.0401	Arid	584	17.9	57	1875	108	72	0	111	_Bare_areas	LC_19
NDLS24	12.30325	-18.59717	Namibia	9.56	Alkaline	Very_strongly_alkaline	127.23	4701.56	366.41	133.05	41.28	0	0.07	93	0	7	Sand	Coarse	0.0192	Hyper_arid	514	17.9	51	1884	118	30	0	131	_Closed_to_open_(>15%)_grassland	LC_13
NDLS25	12.73672	-18.73426	Namibia	9.13	Alkaline	Very_strongly_alkaline	190.94	3418.73	306.56	73.62	117.94	0.01	0.16	79	10	10	Loamy_sand	Coarse	0.0374	Arid	454	18.4	57	1902	111	74	0	115	_Sparse_(>15%)_vegetation_(woody_vegetation,_shrubs,_grassland)	LC_14
NDLS26	13.19668	-18.83975	Namibia	8.69	Alkaline	Strongly_alkaline	108	1662.28	315.71	41.52	186.27	0.02	0.16	78	13	10	Loamy_sand	Coarse	0.0395	Arid	618	21	57	2071	124	84	0	113	_Sparse_(>15%)_vegetation_(woody_vegetation,_shrubs,_grassland)	LC_14
GR.BULT1	26.17164	-28.35644	South Africa	7.04	Neutral	Neutral	69.4	341.9	55.43	1.412	1.648	0.16	0.683	46	50	4	Sandy_loam	Mod_coarse	0.2566	Semi_arid	2481	16.2	48	5785	-40	548	7	67	_Closed_to_open_(>15%)_grassland	LC_13
GR.BULT2	26.22473	-28.17776	South Africa	7.59	Alkaline	Slightly_alkaline	30.5	93.18	21.67	1.424	12.26	0.08	1.377	86	10	4	Loamy_sand	Coarse	0.2527	Semi_arid	1926	16.5	50	5524	-27	538	7	66	_Closed_to_open_(>15%)_grassland	LC_13
GR.BULT3	26.29962	-28.01166	South Africa	5.6	Acidic	Moderately_acid	29.23	38.33	11.53	0.382	7.608	0.13	1.245	84	12	4	Loamy_sand	Coarse	0.2538	Semi_arid	1632	16.8	52	5118	-8	529	7	64	_Closed_to_open_(>15%)_grassland	LC_13
GR.BULT4	26.36901	-27.8705	South Africa	4.94	Acidic	Very_strongly_acid	53.55	54.28	20.21	0.433	1.648	0.18	0.752	92	2	6	Sand	Coarse	0.2534	Semi_arid	2417	16.9	53	4926	0	538	7	66	_Closed_to_open_(>15%)_grassland	LC_13
GR.GR.EY1	30.58756	-29.20503	South Africa	4.88	Acidic	Very_strongly_acid	11.19	34.77	14.18	1.688	1.065	0.2	2.383	44	44	12	Loam	Medium	0.5698	Dry_sub_humid	4537	16.3	59	2846	48	893	12	61	_Closed_(>40%)_broadleaved_deciduous_forest_(>5m)	LC_5
GR.GR.EY2	30.47208	-29.38804	South Africa	4.98	Acidic	Very_strongly_acid	30.85	59.49	27.5	0.887	4.99	0.27	2.754	35	47	18	Loam	Medium	0.5009	Dry_sub_humid	5447	17.9	57	3169	46	861	12	62	_Rainfed_croplands	LC_1
GR.HOW1	30.37809	-29.74906	South Africa	4.9	Acidic	Very_strongly_acid	22.09	56.4	28.07	0.818	1.878	0.26	2.567	22	60	18	Silty_loam	Medium	0.555	Dry_sub_humid	6182	17.5	58	2881	48	890	16	62	_Mosaic_Vegetation_(grassland,_shrubland,_forest)_(50-70%)_/_Cropland_(20-50%)__	LC_3
GR.HOW2	30.28699	-29.88998	South Africa	5.06	Acidic	Very_strongly_acid	8.347	30.67	11.13	0.001	1.17	0.28	2.977	49	47	4	Sandy_loam	Mod_coarse	0.5479	Dry_sub_humid	5074	17.5	58	2910	49	875	17	60	_Open_(15-40%)_broadleaved_deciduous_forest_(>5m)	LC_6
GR.HOW3	30.22132	-30.0261	South Africa	6.12	Acidic	Slightly_acid	6.8	143.3	54.87	4.554	1.243	0.16	1.303	35	61	4	Silty_loam	Medium	0.5231	Dry_sub_humid	4928	18.2	57	2836	61	865	17	55	_Open_(15-40%)_broadleaved_deciduous_forest_(>5m)	LC_6
GR.HOW4	30.08317	-30.11869	South Africa	5.05	Acidic	Very_strongly_acid	8.082	35.41	21.05	0.772	0.713	0.19	1.674	21	55	24	Silty_loam	Medium	0.5719	Dry_sub_humid	4939	16.1	58	3034	32	851	17	61	_Closed_to_open_(>15%)_shrubland_(<5m)	LC_12
GR.HOW5	29.97405	-30.25625	South Africa	5.8	Acidic	Moderately_acid	10.03	69.97	56.66	2.083	1.314	0.2	1.6	32	54	14	Silty_loam	Medium	0.5055	Dry_sub_humid	4279	17.4	57	3002	47	763	15	58	_Mosaic_Vegetation_(grassland,_shrubland,_forest)_(50-70%)_/_Cropland_(20-50%)__	LC_3
GR.HOW6	29.88928	-30.43386	South Africa	6.02	Acidic	Moderately_acid	10.44	70.5	38.74	1.624	0.85	0.24	2.828	28	64	8	Silty_loam	Medium	0.494	Semi_arid	3932	17.5	56	3055	50	790	17	57	_Mosaic_Forest/Shrubland_(50-70%)_/_Grassland_(20-50%)	LC_10
GR.HOW7	29.75989	-30.51305	South Africa	4.73	Acidic	Very_strongly_acid	8.466	37.75	17.49	0.89	1.449	0.22	1.86	33	47	20	Loam	Medium	0.6352	Dry_sub_humid	4854	15.7	60	2954	30	920	13	60	_Closed_(>40%)_broadleaved_deciduous_forest_(>5m)	LC_5
GR.JAC1	24.92729	-29.24553	South Africa	8.01	Alkaline	Moderately_alkaline	30.05	151.3	16.95	0.477	4.43	0.1	0.88	81	15	4	Loamy_sand	Coarse	0.1844	Arid	2097	17.6	51	5383	8	423	9	61	_Closed_to_open_(>15%)_grassland	LC_13
GR.JAC2	24.75779	-29.13967	South Africa	6.8	Neutral	Neutral	63.76	111.9	24.58	1.028	4.289	0.11	0.678	74	22	4	Loamy_sand	Coarse	0.1828	Arid	3150	17.6	51	5474	3	433	8	63	_Mosaic_Forest/Shrubland_(50-70%)_/_Grassland_(20-50%)	LC_10
GR.JAC3	24.63812	-29.01264	South Africa	7.7	Alkaline	Slightly_alkaline	12.39	59.34	7.822	0.022	1.743	0.1	0.889	92	4	4	Sand	Coarse	0.183	Arid	3138	17.3	51	5517	-2	463	8	65	_Closed_to_open_(>15%)_grassland	LC_13
GR.JAC4	24.70313	-28.83706	South Africa	7.8	Alkaline	Slightly_alkaline	36.56	192.3	37.83	2.861	2.453	0.06	0.605	67	19	14	Sandy_loam	Mod_coarse	0.1886	Arid	2065	17.8	52	5238	11	450	8	65	_Closed_to_open_(>15%)_grassland	LC_13
GR.KIM1	24.91705	-28.70744	South Africa	6.95	Neutral	Neutral	19.32	45.08	11.4	0.052	0.871	0.12	0.498	85	11	4	Loamy_sand	Coarse	0.1991	Arid	1990	17.7	51	5183	11	447	7	64	_Mosaic_Vegetation_(grassland,_shrubland,_forest)_(50-70%)_/_Cropland_(20-50%)__	LC_3
GR.KIM2	25.112	-28.62686	South Africa	7.08	Neutral	Neutral	45.94	124.7	32.23	0.452	1.871	0.07	1.27	81	11	8	Loamy_sand	Coarse	0.2069	Semi_arid	2680	17.2	51	5240	3	452	7	65	_Closed_to_open_(>15%)_grassland	LC_13
GR.KIM3	25.29146	-28.51597	South Africa	8.48	Alkaline	Moderately_alkaline	68.84	534.1	31.65	32.29	0.734	0.09	0.664	76	18	6	Loamy_sand	Coarse	0.2103	Semi_arid	1901	17.1	51	5261	0	450	6	66	_Closed_to_open_(>15%)_grassland	LC_13
GR.KIM4	25.45043	-28.40269	South Africa	7.6	Alkaline	Slightly_alkaline	35.88	154.1	51.41	1.689	2.724	0.15	0.855	77	17	6	Loamy_sand	Coarse	0.2139	Semi_arid	2173	17	51	5370	-8	459	6	66	_Closed_to_open_(>15%)_grassland	LC_13
GR.KIM5	25.64232	-28.38771	South Africa	7.03	Neutral	Neutral	57.06	61.64	16.59	0.639	3.261	0.11	1.17	85	9	6	Loamy_sand	Coarse	0.2228	Semi_arid	2734	16.8	50	5457	-16	475	6	67	_Closed_to_open_(>15%)_grassland	LC_13
GR.KIM6	25.8607	-28.35271	South Africa	6.53	Acidic	Slightly_acid	48.02	133.2	41.3	0.696	3.777	0.16	0.961	70	14	16	Sandy_loam	Mod_coarse	0.2352	Semi_arid	2634	16.4	49	5598	-28	507	6	67	_Closed_to_open_(>15%)_grassland	LC_13
GR.KIM7	26.03642	-28.30098	South Africa	6.96	Neutral	Neutral	54.95	66.73	29.42	1.618	1.168	0.14	1.055	79	11	10	Loamy_sand	Coarse	0.2514	Semi_arid	2768	16	48	5719	-39	546	7	67	_Closed_to_open_(>15%)_grassland	LC_13
GR.LA1	29.72565	-28.60586	South Africa	5.63	Acidic	Moderately_acid	15.31	38.47	9.496	0.588	0.646	0.09	1.228	75	19	6	Loamy_sand	Coarse	0.4227	Semi_arid	2804	18.2	55	4221	19	756	8	68	_Mosaic_Vegetation_(grassland,_shrubland,_forest)_(50-70%)_/_Cropland_(20-50%)__	LC_3
GR.LA2	29.82049	-28.75824	South Africa	5.75	Acidic	Moderately_acid	18.62	81.27	23.35	0.877	0.944	0.1	1.339	55	31	14	Sandy_loam	Mod_coarse	0.4186	Semi_arid	3769	18	54	4470	12	726	8	70	_Mosaic_Vegetation_(grassland,_shrubland,_forest)_(50-70%)_/_Cropland_(20-50%)__	LC_3
GR.LA3	29.99942	-28.83057	South Africa	7.15	Neutral	Neutral	40.24	148.7	38.47	0.712	0.86	0.14	1.674	33	63	4	Silty_loam	Medium	0.4233	Semi_arid	3971	17.5	55	4173	12	712	7	70	_Mosaic_Vegetation_(grassland,_shrubland,_forest)_(50-70%)_/_Cropland_(20-50%)__	LC_3
GR.LA4	30.18504	-28.9041	South Africa	7.31	Neutral	Neutral	47.06	333.7	44.68	1.127	0.27	0.13	1.265	55	23	22	Sandy_clay_loam	Mod_fine	0.4575	Semi_arid	2538	16.7	56	3805	17	740	8	69	_Closed_to_open_(>15%)_grassland	LC_13
GR.LA5	30.38738	-28.96953	South Africa	6.18	Acidic	Slightly_acid	40.72	71.06	20.2	1.213	2.198	0.11	0.93	64	16	20	Sandy_clay_loam	Mod_fine	0.4325	Semi_arid	4844	17.7	57	3561	36	733	9	66	_Closed_to_open_(>15%)_grassland	LC_13
GR.LA6	30.54163	-29.04536	South Africa	5.1	Acidic	Strongly_acid	35.36	30.25	10.05	1.546	1.021	0.3	3.796	54	42	4	Sandy_loam	Mod_coarse	0.5764	Dry_sub_humid	3885	14.9	57	3182	27	869	12	64	_Closed_(>40%)_broadleaved_deciduous_forest_(>5m)	LC_5
GR.M1	29.73546	-27.62815	South Africa	5.26	Acidic	Strongly_acid	16.23	50.59	19.84	0.571	0.796	0.13	1.861	52	34	14	Loam	Medium	0.4388	Semi_arid	4087	14.8	56	3974	-2	756	9	69	_Mosaic_Vegetation_(grassland,_shrubland,_forest)_(50-70%)_/_Cropland_(20-50%)__	LC_3
GR.M2	29.88701	-27.69775	South Africa	5.21	Acidic	Strongly_acid	21.67	47.25	13.47	0.311	1.913	0.32	3.052	45	45	10	Loam	Medium	0.4246	Semi_arid	5176	16.5	57	3934	12	779	9	69	_Closed_to_open_(>15%)_grassland	LC_13
GR.N1	29.96487	-27.88046	South Africa	5.57	Acidic	Strongly_acid	27.38	96.2	16	0.446	1.704	0.21	1.973	43	41	16	Loam	Medium	0.4336	Semi_arid	4251	17.3	57	3947	18	775	8	70	_Mosaic_Vegetation_(grassland,_shrubland,_forest)_(50-70%)_/_Cropland_(20-50%)__	LC_3
GR.N2	29.97788	-28.05684	South Africa	5.63	Acidic	Moderately_acid	35.91	98.66	48.81	0.112	1.817	0.19	1.861	33	49	18	Loam	Medium	0.4554	Semi_arid	3641	16.9	57	3913	16	769	8	69	_Mosaic_Vegetation_(grassland,_shrubland,_forest)_(50-70%)_/_Cropland_(20-50%)__	LC_3
GR.N3	29.965	-28.23504	South Africa	5.7	Acidic	Moderately_acid	24.97	67.68	31	1.111	1.47	0.2	2.382	44	40	16	Loam	Medium	0.4416	Semi_arid	5170	17.2	57	3974	18	756	8	69	_Mosaic_Vegetation_(grassland,_shrubland,_forest)_(50-70%)_/_Cropland_(20-50%)__	LC_3
GR.N4	29.91748	-28.41794	South Africa	5.76	Acidic	Moderately_acid	34.59	180.1	91.75	1.794	0.777	0.23	2.233	36	44	20	Loam	Medium	0.4256	Semi_arid	4058	17.9	56	4117	20	736	8	69	_Mosaic_Vegetation_(grassland,_shrubland,_forest)_(50-70%)_/_Cropland_(20-50%)__	LC_3
GR.WES1	26.48262	-27.73993	South Africa	6.46	Acidic	Slightly_acid	32.64	57.13	18.97	0.148	6.299	0.11	1.465	85	11	4	Loamy_sand	Coarse	0.2574	Semi_arid	3982	17.1	53	4911	2	547	8	66	_Closed_to_open_(>15%)_grassland	LC_13
GR.WES10	27.60556	-27.31073	South Africa	5.94	Acidic	Moderately_acid	47.28	179.1	74.28	10.23	2.236	0.34	3.126	49	33	18	Loam	Medium	0.3068	Semi_arid	4399	16.5	53	4695	-5	633	8	66	_Closed_to_open_(>15%)_grassland	LC_13
GR.WES11	27.51076	-27.1932	South Africa	6.33	Acidic	Slightly_acid	82.32	283.6	86.83	1.989	1.01	0.24	2.168	40	38	22	Loam	Medium	0.3044	Semi_arid	2985	16.6	53	4679	-3	635	7	68	_Closed_to_open_(>15%)_grassland	LC_13
GR.WES2	26.62716	-27.59181	South Africa	5.6	Acidic	Moderately_acid	110.2	207.2	45.44	2.017	3.788	0.12	2.307	36	30	34	Clay_loam	Mod_fine	0.2689	Semi_arid	1689	16.9	51	5047	-9	569	9	65	_Closed_to_open_(>15%)_grassland	LC_13
GR.WES3	26.76084	-27.57397	South Africa	7.31	Neutral	Neutral	62.94	56.59	17.69	0.711	9.266	0.12	0.632	85	9	6	Loamy_sand	Coarse	0.2729	Semi_arid	2711	16.7	51	5057	-13	579	8	65	_Closed_to_open_(>15%)_grassland	LC_13
GR.WES4	26.95082	-27.61292	South Africa	7.03	Neutral	Neutral	33.46	76.13	22.43	0.938	4.073	0.13	0.547	73	17	10	Sandy_loam	Mod_coarse	0.2743	Semi_arid	3084	16.5	52	4928	-7	586	7	66	_Closed_to_open_(>15%)_grassland	LC_13
GR.WES5	27.11282	-27.71585	South Africa	5.58	Acidic	Strongly_acid	34.75	123.9	47.46	4.838	2.04	0.24	2.084	56	28	16	Sandy_loam	Mod_coarse	0.2825	Semi_arid	2736	16.2	53	4861	-4	589	6	65	_Closed_to_open_(>15%)_grassland	LC_13
GR.WES6	27.26235	-27.65301	South Africa	6.97	Neutral	Neutral	25.24	73.46	21.89	0.323	1.218	0.1	1.778	74	20	6	Sandy_loam	Mod_coarse	0.2928	Semi_arid	2347	16.5	54	4835	0	606	7	64	_Closed_to_open_(>15%)_grassland	LC_13
GR.WES7	27.44046	-27.59704	South Africa	6.2	Acidic	Slightly_acid	41.46	132	44.32	0.276	2.293	0.17	1.426	51	35	14	Loam	Medium	0.3029	Semi_arid	2314	16.1	54	4739	-4	625	8	64	_Closed_to_open_(>15%)_grassland	LC_13
GR.WES8	27.64293	-27.56505	South Africa	6.1	Acidic	Slightly_acid	32.67	176.2	108.9	1.523	0.434	0.26	2.716	39	43	18	Loam	Medium	0.334	Semi_arid	3386	15.6	54	4669	-10	642	9	65	_Mosaic_Vegetation_(grassland,_shrubland,_forest)_(50-70%)_/_Cropland_(20-50%)__	LC_3
GR.WES9	27.75011	-27.42842	South Africa	6.83	Neutral	Neutral	12.15	38.2	27.45	0.737	2.567	0.09	0.404	66	24	10	Sandy_loam	Mod_coarse	0.3395	Semi_arid	3088	15.6	53	4656	-13	646	8	66	_Closed_to_open_(>15%)_grassland	LC_13
KG1A	20.402	-26.0207	South Africa	7.5	Alkaline	Slightly_alkaline	18.64	90.53	24.11	144.5	0.47	0.01	0.09	60	36	4	Sandy_loam	Mod_coarse	0.0821	Arid	1663	20	52	5849	3	220	1	89	_Closed_to_open_(>15%)_grassland	LC_13
KG1B	20.4017	-26.0207	South Africa	7.5	Alkaline	Slightly_alkaline	10.49	26.73	9.73	34.81	0.38	0.01	0.07	60	36	4	Sandy_loam	Mod_coarse	0.0821	Arid	1663	20	52	5849	3	220	1	89	_Closed_to_open_(>15%)_grassland	LC_13
KG1C	20.4019	-26.0209	South Africa	7.5	Alkaline	Slightly_alkaline	9.51	13.55	9.37	14.1	0.45	0.01	0.04	60	36	4	Sandy_loam	Mod_coarse	0.0821	Arid	1663	20	52	5849	3	220	1	89	_Closed_to_open_(>15%)_grassland	LC_13
KG1D	20.4018	-26.0206	South Africa	7.3	Neutral	Neutral	6.91	15.04	6.2	10.75	0.45	0.01	0.1	60	36	4	Sandy_loam	Mod_coarse	0.0821	Arid	1663	20	52	5849	3	220	1	89	_Closed_to_open_(>15%)_grassland	LC_13
KG2A	20.4424	-25.9237	South Africa	6.6	Neutral	Neutral	8.07	13.88	4.32	9.41	0.58	0.01	0.07	60	36	4	Sandy_loam	Mod_coarse	0.085	Arid	1589	19.9	52	5853	2	228	1	87	Bare_areas	LC_19
KG2B	20.4426	-25.9235	South Africa	6.9	Neutral	Neutral	15.84	10.44	8.76	9.49	0.59	0.01	0.03	60	36	4	Sandy_loam	Mod_coarse	0.085	Arid	1589	19.9	52	5853	2	228	1	87	Bare_areas	LC_19
KG2C	20.4429	-25.9236	South Africa	7.2	Neutral	Neutral	12.34	10.74	8.68	8.87	0.26	0.01	0.04	60	36	4	Sandy_loam	Mod_coarse	0.085	Arid	1589	19.9	52	5853	2	228	1	87	Bare_areas	LC_19
KG2D	20.4427	-25.9238	South Africa	7.1	Neutral	Neutral	13.66	9.82	6.79	10.74	0.83	0.01	0.14	58	38	4	Sandy_loam	Mod_coarse	0.085	Arid	1589	19.9	52	5853	2	228	1	87	Bare_areas	LC_19
KG3A	20.7154	-26.1571	South Africa	7.1	Neutral	Neutral	10.1	6.37	4.8	8.13	0.72	0.02	0.02	58	38	4	Sandy_loam	Mod_coarse	0.0878	Arid	1482	20	52	5810	6	226	1	85	Bare_areas	LC_19
KG3C	20.7154	-26.1589	South Africa	7.3	Neutral	Neutral	8.43	5.78	3.21	7.46	0.66	0.02	0.07	59	37	4	Sandy_loam	Mod_coarse	0.0877	Arid	1644	20	53	5799	6	226	1	85	Bare_areas	LC_19
KG3D	20.715	-26.1586	South Africa	7.3	Neutral	Neutral	13.38	6.92	5.45	8.26	0.71	0.02	0.06	60	36	4	Sandy_loam	Mod_coarse	0.0877	Arid	1644	20	53	5799	6	226	1	85	Bare_areas	LC_19
MK1A	27.4767	-24.5361	South Africa	6.2	Acidic	Slightly_acid	34.34	169.74	90.89	91.76	0.16	0.12	1.22	57	29	14	Sandy_loam	Mod_coarse	0.2773	Semi_arid	3334	20.9	54	4274	45	589	2	88	_Mosaic_Forest/Shrubland_(50-70%)_/_Grassland_(20-50%)	LC_10
MK1B	27.4767	-24.5361	South Africa	6.2	Acidic	Slightly_acid	16.7	36.23	17.73	20.06	0.03	0.07	0.89	58	32	10	Sandy_loam	Mod_coarse	0.2773	Semi_arid	3334	20.9	54	4274	45	589	2	88	_Mosaic_Forest/Shrubland_(50-70%)_/_Grassland_(20-50%)	LC_10
MK1C	27.4767	-24.5361	South Africa	6	Acidic	Slightly_acid	26.2	30.15	14.27	12.01	0.14	0.04	0.44	62	32	6	Sandy_loam	Mod_coarse	0.2773	Semi_arid	3334	20.9	54	4274	45	589	2	88	_Mosaic_Forest/Shrubland_(50-70%)_/_Grassland_(20-50%)	LC_10
MK1D	27.4767	-24.5361	South Africa	5.6	Acidic	Moderately_acid	51.36	84.51	68.67	66.96	0.25	0.11	1.09	56	32	12	Sandy_loam	Mod_coarse	0.2773	Semi_arid	3334	20.9	54	4274	45	589	2	88	_Mosaic_Forest/Shrubland_(50-70%)_/_Grassland_(20-50%)	LC_10
MK2A	27.4840057	-24.5286327	South Africa	6.4	Acidic	Slightly_acid	42.31	2.47	2.33	6.42	0.53	0.02	0.2	59	35	6	Sandy_loam	Mod_coarse	0.274	Semi_arid	3522	20.8	54	4271	44	591	2	88	_Mosaic_Vegetation_(grassland,_shrubland,_forest)_(50-70%)_/_Cropland_(20-50%)__	LC_3
MK2B	27.4840057	-24.5286327	South Africa	6.5	Acidic	Slightly_acid	12.55	3.47	2	5.69	0.07	0.03	0.25	60	34	6	Sandy_loam	Mod_coarse	0.274	Semi_arid	3522	20.8	54	4271	44	591	2	88	_Mosaic_Vegetation_(grassland,_shrubland,_forest)_(50-70%)_/_Cropland_(20-50%)__	LC_3
MK2D	27.4840057	-24.5286327	South Africa	6.5	Acidic	Slightly_acid	5.56	1.75	1.18	6.69	0.05	0.01	0.06	64	30	6	Sandy_loam	Mod_coarse	0.274	Semi_arid	3522	20.8	54	4271	44	591	2	88	_Mosaic_Vegetation_(grassland,_shrubland,_forest)_(50-70%)_/_Cropland_(20-50%)__	LC_3
MK3A	27.499382	-24.495427	South Africa	6.5	Acidic	Slightly_acid	24.91	30.41	12.93	7.97	0.29	0.02	0.17	62	26	12	Sandy_loam	Mod_coarse	0.271	Semi_arid	3888	20.5	54	4272	40	596	3	87	_Closed_(>40%)_broadleaved_deciduous_forest_(>5m)	LC_5
MK3B	27.499382	-24.495427	South Africa	6.3	Acidic	Slightly_acid	6.31	2.73	1.54	6.25	0.08	0.01	0.23	61	33	6	Sandy_loam	Mod_coarse	0.271	Semi_arid	3888	20.5	54	4272	40	596	3	87	_Closed_(>40%)_broadleaved_deciduous_forest_(>5m)	LC_5
MK3C	27.499382	-24.495427	South Africa	6	Acidic	Slightly_acid	47.51	63.9	18.99	8.61	0.33	0.09	0.86	61	31	8	Sandy_loam	Mod_coarse	0.271	Semi_arid	3888	20.5	54	4272	40	596	3	87	_Closed_(>40%)_broadleaved_deciduous_forest_(>5m)	LC_5
MK3D	27.499382	-24.495427	South Africa	6.8	Neutral	Neutral	26.08	30.21	6.79	7.2	0.42	0.08	0.94	60	32	8	Sandy_loam	Mod_coarse	0.271	Semi_arid	3888	20.5	54	4272	40	596	3	87	_Closed_(>40%)_broadleaved_deciduous_forest_(>5m)	LC_5
NK.Brit1	23.30268	-30.56583	South Africa	7.8	Alkaline	Slightly_alkaline	43.23	398	38.52	1.417	3.331	0.08	0.587	70	26	4	Sandy_loam	Mod_coarse	0.1126	Arid	1034	17.2	50	5589	6	248	6	66	_Closed_to_open_(>15%)_grassland	LC_13
NK.Brit2	23.09599	-30.56752	South Africa	8.14	Alkaline	Moderately_alkaline	48.32	223.7	39.89	1.58	3.736	0.07	0.283	76	20	4	Loamy_sand	Coarse	0.1098	Arid	654	16.7	50	5627	0	242	6	63	_Sparse_(>15%)_vegetation_(woody_vegetation,_shrubs,_grassland)	LC_14
NK.Brit3	22.90342	-30.5812	South Africa	7.77	Alkaline	Slightly_alkaline	47.71	410.1	34.84	49.44	0.211	0.1	0.334	66	30	4	Sandy_loam	Mod_coarse	0.109	Arid	1203	16.6	50	5671	-3	232	5	61	_Closed_to_open_(>15%)_grassland	LC_13
NK.Brit4	22.71713	-30.64258	South Africa	7.97	Alkaline	Moderately_alkaline	35.79	341.8	17.53	1.688	3.56	0.08	0.384	67	27	6	Sandy_loam	Mod_coarse	0.1067	Arid	1146	16.4	50	5626	-5	236	6	63	_Closed_to_open_(>15%)_grassland	LC_13
NK.Brit5	22.55751	-30.74865	South Africa	8.37	Alkaline	Moderately_alkaline	39.25	370.3	39.57	50.91	2.657	0.05	0.104	80	16	4	Loamy_sand	Coarse	0.1061	Arid	1077	16	50	5575	-7	237	6	65	_Closed_to_open_(>15%)_grassland	LC_13
NK.Brit6	22.3755	-30.82479	South Africa	7.8	Alkaline	Slightly_alkaline	54.18	214.4	38.37	2.364	5.85	0.1	0.722	63	27	10	Sandy_loam	Mod_coarse	0.102	Arid	807	16.1	50	5536	-4	234	6	66	_Closed_to_open_(>15%)_grassland	LC_13
NK.Brit7	22.20983	-30.9536	South Africa	8.75	Alkaline	Strongly_alkaline	43.98	401.1	34.23	11.04	3.563	0.08	0.281	77	19	4	Loamy_sand	Coarse	0.1015	Arid	884	15.7	51	5444	-4	239	6	68	_Sparse_(>15%)_vegetation_(woody_vegetation,_shrubs,_grassland)	LC_14
NK.Brit8	22.01715	-30.9939	South Africa	8.33	Alkaline	Moderately_alkaline	30.69	248.2	23.46	1.59	2.681	0.06	0.156	67	28	6	Sandy_loam	Mod_coarse	0.0969	Arid	848	16.2	51	5468	1	237	7	66	_Closed_to_open_(>15%)_grassland	LC_13
NK.CAR1	21.81584	-31.06651	South Africa	7.92	Alkaline	Moderately_alkaline	31.28	87.85	30.3	1.055	4.796	0.07	0.282	79	17	4	Loamy_sand	Coarse	0.0966	Arid	847	15.9	51	5455	0	234	7	61	_Closed_to_open_(>15%)_grassland	LC_13
NK.CAR2	21.60795	-31.13132	South Africa	8.14	Alkaline	Moderately_alkaline	38.68	405.5	23.46	0.97	3.594	0.08	0.334	75	19	6	Loamy_sand	Coarse	0.0937	Arid	933	15.8	51	5468	-1	227	8	59	_Sparse_(>15%)_vegetation_(woody_vegetation,_shrubs,_grassland)	LC_13
NK.CAR3	21.4205	-31.2528	South Africa	7.64	Alkaline	Slightly_alkaline	21.84	99.19	19.62	1.341	3.208	0.04	0.263	82	14	4	Loamy_sand	Coarse	0.0826	Arid	972	16.5	51	5516	3	192	7	57	_Sparse_(>15%)_vegetation_(woody_vegetation,_shrubs,_grassland)	LC_13
NK.CAR4	21.2013	-31.2549	South Africa	7.9	Alkaline	Moderately_alkaline	21.61	262.6	8.443	1.355	2.836	0.03	0.073	83	13	4	Loamy_sand	Coarse	0.0804	Arid	804	16.5	50	5539	4	188	7	56	_Closed_to_open_(>15%)_grassland	LC_13
NK.CAR5	20.97328	-31.30879	South Africa	7.89	Alkaline	Moderately_alkaline	32.17	335.4	16.99	0.989	2.568	0.04	0.293	89	7	4	Sand	Coarse	0.0789	Arid	817	16.5	51	5466	6	184	7	51	_Closed_to_open_(>15%)_grassland	LC_13
NK.HOP1	24.17634	-29.66287	South Africa	8.38	Alkaline	Moderately_alkaline	19.86	161	27.51	1.057	1.886	0.03	0.654	88	8	4	Sand	Coarse	0.1467	Arid	2056	17.7	50	5741	3	323	6	61	_Closed_to_open_(>15%)_grassland	LC_13
NK.HOP2	24.34475	-29.74635	South Africa	8.15	Alkaline	Moderately_alkaline	39.4	436.3	19.08	1.34	1.057	0.05	0.488	83	13	4	Loamy_sand	Coarse	0.1553	Arid	2018	17.6	50	5784	2	334	7	58	_Closed_to_open_(>15%)_grassland	LC_13
NK.ORA1	24.42949	-29.88748	South Africa	7.04	Neutral	Neutral	17.66	32.57	13.82	0.241	2.625	0.04	0.253	87	9	4	Sand	Coarse	0.1511	Arid	2756	17.1	49	5836	-5	342	8	56	_Mosaic_Vegetation_(grassland,_shrubland,_forest)_(50-70%)_/_Cropland_(20-50%)__	LC_3
NK.ORA2	24.59786	-29.96448	South Africa	7.28	Neutral	Neutral	47.61	180	16.8	10.82	4.204	0.07	0.749	67	23	10	Sandy_loam	Mod_coarse	0.1497	Arid	2008	17.7	49	5766	1	345	8	58	_Closed_to_open_(>15%)_grassland	LC_13
NK.ORA3	24.69885	-29.83126	South Africa	6.81	Neutral	Neutral	50.02	173.8	93.04	48.64	6.19	0.04	0.84	52	28	20	Loam	Medium	0.1573	Arid	1416	18.2	50	5551	14	365	9	57	_Closed_to_open_(>15%)_grassland	LC_13
NK.ORA4	24.81376	-29.70211	South Africa	7.17	Neutral	Neutral	48.93	57.32	15.95	0.659	3.278	0.15	0.384	85	11	4	Loamy_sand	Coarse	0.1718	Arid	1825	17.4	50	5496	8	398	10	57	_Closed_to_open_(>15%)_grassland	LC_13
NK.ORA5	24.90406	-29.53241	South Africa	7.42	Alkaline	Slightly_alkaline	17.54	74.83	30.7	0.53	1.136	0.06	0.212	82	14	4	Loamy_sand	Coarse	0.1781	Arid	1976	17.6	50	5414	10	405	10	60	_Closed_to_open_(>15%)_grassland	LC_13
NK.ORA6	25.02091	-29.38925	South Africa	6.81	Neutral	Neutral	30.18	114.3	39.52	0.862	1.745	0.18	0.354	74	22	4	Loamy_sand	Coarse	0.1855	Arid	1928	17.8	50	5360	13	409	9	61	_Closed_to_open_(>15%)_grassland	LC_13
NK.POT1	23.51323	-30.56789	South Africa	7.96	Alkaline	Moderately_alkaline	23.07	172.6	33.42	1.042	1.786	0.06	0.08	81	11	8	Loamy_sand	Coarse	0.1162	Arid	731	16.9	50	5579	6	268	7	64	_Closed_to_open_(>15%)_grassland	LC_13
NK.POT2	23.57194	-30.40216	South Africa	7.95	Alkaline	Moderately_alkaline	48.37	430.1	24.86	3.632	4.115	0.07	0.553	70	14	16	Loamy_sand	Coarse	0.1192	Arid	1111	17.1	50	5644	6	267	7	63	_Closed_to_open_(>15%)_grassland	LC_13
NK.POT3	23.62057	-30.2363	South Africa	7.81	Alkaline	Slightly_alkaline	39.83	155.1	19.74	1.18	5.615	0.1	1.295	81	15	4	Loamy_sand	Coarse	0.1202	Arid	1262	17.2	49	5759	3	269	7	62	_Closed_to_open_(>15%)_grassland	LC_13
NK.POT4	23.66441	-30.06635	South Africa	7.27	Neutral	Neutral	34.45	508.7	32.3	74.04	1.155	0.2	1.133	77	18	6	Loamy_sand	Coarse	0.1232	Arid	1270	17.4	48	5801	2	269	7	61	_Closed_to_open_(>15%)_grassland	LC_13
NK.POT5	23.7313	-29.90781	South Africa	7.97	Alkaline	Moderately_alkaline	70.37	283.9	20.95	1.028	4.995	0.11	0.769	74	18	8	Loamy_sand	Coarse	0.1288	Arid	1739	17.2	48	5875	-2	285	7	62	_Closed_to_open_(>15%)_grassland	LC_13
NK.POT6	23.89255	-29.80303	South Africa	7.42	Alkaline	Slightly_alkaline	26.85	59.66	30.76	0.55	1.881	0.12	0.131	81	15	4	Loamy_sand	Coarse	0.1393	Arid	2036	16.9	49	5816	-6	313	7	60	_Closed_to_open_(>15%)_grassland	LC_13
NK.POT7	24.04122	-29.68034	South Africa	7.66	Alkaline	Slightly_alkaline	15.35	53.86	20.37	0.299	2.425	0.05	0.04	86	10	4	Loamy_sand	Coarse	0.144	Arid	2516	17.5	50	5732	0	323	7	62	_Closed_to_open_(>15%)_grassland	LC_13
NK.WI1	20.76834	-31.36319	South Africa	7.7	Alkaline	Slightly_alkaline	25.85	277.4	10.57	1.57	2.865	0.07	0.526	90	6	4	Sand	Coarse	0.0736	Arid	818	16.9	52	5376	12	166	8	48	_Closed_to_open_(>15%)_grassland	LC_13
NK.WI2	20.56223	-31.37447	South Africa	8.04	Alkaline	Moderately_alkaline	27.01	93.44	26.9	1.34	2.286	0.02	0.202	75	21	4	Loamy_sand	Coarse	0.083	Arid	924	16	53	5218	7	187	10	38	_Closed_to_open_(>15%)_grassland	LC_13
NK.WI3	20.35298	-31.3958	South Africa	8.56	Alkaline	Strongly_alkaline	28.34	109.6	14.9	14.5	3.279	0.03	0.031	94	2	4	Sand	Coarse	0.0777	Arid	838	16.6	54	5073	16	170	9	35	_Mosaic_Vegetation_(grassland,_shrubland,_forest)_(50-70%)_/_Cropland_(20-50%)__	LC_3
NK.WI4	20.07042	-31.46475	South Africa	5.75	Acidic	Moderately_acid	23.72	116.1	31.31	1.028	2.947	0.05	0.313	95	1	4	Sand	Coarse	0.0884	Arid	867	15.9	55	4743	19	201	10	31	_Closed_to_open_(>15%)_grassland	LC_13
NK1A	17.5826	-30.041	South Africa	7	Neutral	Neutral	18.17	13.54	9.89	23.47	0.59	0.01	0.17	61	35	4	Sandy_loam	Mod_coarse	0.049	Arid	1276	17.8	60	3036	70	121	2	61	_Closed_to_open_(>15%)_grassland	LC_13
NK1B	17.5824	-30.0413	South Africa	7.4	Alkaline	Slightly_alkaline	18.94	4.18	3.87	51.79	0.55	0.01	0.17	60	34	6	Sandy_loam	Mod_coarse	0.049	Arid	1276	17.8	60	3036	70	121	2	61	_Closed_to_open_(>15%)_grassland	LC_13
NK1C	17.5823	-30.0411	South Africa	6.8	Neutral	Neutral	8.6	8.46	6.92	11.08	0.36	0	0.13	60	36	4	Sandy_loam	Mod_coarse	0.049	Arid	1276	17.8	60	3036	70	121	2	61	_Closed_to_open_(>15%)_grassland	LC_13
NK1D	17.5827	-30.0411	South Africa	6.9	Neutral	Neutral	8.33	7.92	6.59	9.8	0.71	0.01	0.08	61	35	4	Sandy_loam	Mod_coarse	0.049	Arid	1276	17.8	60	3036	70	121	2	61	_Closed_to_open_(>15%)_grassland	LC_13
NK2A	17.3529	-30.1682	South Africa	6.4	Acidic	Slightly_acid	115.15	257.91	59.01	539.18	0.6	0.05	0.52	60	34	6	Sandy_loam	Mod_coarse	0.0557	Arid	1333	17.2	62	2535	76	119	1	72	_Closed_to_open_(>15%)_grassland	LC_13
NK2B	17.3526	-30.1679	South Africa	6.2	Acidic	Slightly_acid	84.67	131.9	84.52	2115.26	0.05	0.01	0.09	60	36	4	Sandy_loam	Mod_coarse	0.0557	Arid	1333	17.2	62	2535	76	119	1	72	_Closed_to_open_(>15%)_grassland	LC_13
NK2C	17.3529	-30.1679	South Africa	6.6	Neutral	Neutral	210.97	239.85	176.06	4845.27	1.21	0.03	0.62	58	32	10	Sandy_loam	Mod_coarse	0.0557	Arid	1333	17.2	62	2535	76	119	1	72	_Closed_to_open_(>15%)_grassland	LC_13
NK2D	17.3529	-30.1682	South Africa	6.4	Acidic	Slightly_acid	75.1	33.15	39.96	507.15	0.42	0.02	0.37	59	37	4	Sandy_loam	Mod_coarse	0.0557	Arid	1333	17.2	62	2535	76	119	1	72	_Closed_to_open_(>15%)_grassland	LC_13
NK3C	17.3768	-30.1414	South Africa	7	Neutral	Neutral	480.79	1183.31	137.94	8600.13	0.99	0.17	2.1	58	26	16	Sandy_loam	Mod_coarse	0.0532	Arid	1281	17.3	62	2584	76	117	1	70	_Closed_to_open_(>15%)_grassland	LC_13
RT1A	17.1179	-28.19	South Africa	6.8	Neutral	Neutral	11.91	23.21	6.17	14.25	0.54	0.01	0.14	63	31	6	Sandy_loam	Mod_coarse	0.0186	Hyper_arid	863	18.5	59	3125	70	54	2	35	_Closed_to_open_(>15%)_grassland	LC_13
RT1B	17.1181	-28.19	South Africa	7.2	Neutral	Neutral	8.75	20.6	4.42	10.84	0.46	0.01	0.1	58	38	4	Sandy_loam	Mod_coarse	0.0186	Hyper_arid	863	18.5	59	3125	70	54	2	35	_Closed_to_open_(>15%)_grassland	LC_13
RT1C	17.1179	-28.19	South Africa	6.8	Neutral	Neutral	7.68	22.32	4.35	11.59	0.3	0	0.11	60	34	6	Sandy_loam	Mod_coarse	0.0186	Hyper_arid	863	18.5	59	3125	70	54	2	35	_Closed_to_open_(>15%)_grassland	LC_13
RT1D	17.1181	-28.1898	South Africa	6.8	Neutral	Neutral	13.27	24.99	6.09	14.39	0.58	0.01	0.08	60	36	4	Sandy_loam	Mod_coarse	0.0186	Hyper_arid	863	18.5	59	3125	70	54	2	35	_Closed_to_open_(>15%)_grassland	LC_13
RT2A	17.1184	-28.2155	South Africa	7.1	Neutral	Neutral	20.53	11.18	3.19	63.59	1.57	0.02	0.17	60	34	6	Sandy_loam	Mod_coarse	0.0205	Hyper_arid	825	18.1	59	3195	66	60	3	33	_Sparse_(>15%)_vegetation_(woody_vegetation,_shrubs,_grassland)	LC_14
RT2C	17.1183	-28.2161	South Africa	7.3	Neutral	Neutral	17.56	4.89	8.05	121.56	2.15	0.02	0.04	63	31	6	Sandy_loam	Mod_coarse	0.0205	Hyper_arid	825	18.1	59	3195	66	60	3	33	_Sparse_(>15%)_vegetation_(woody_vegetation,_shrubs,_grassland)	LC_14
RT2D	17.1181	-28.2162	South Africa	7.1	Neutral	Neutral	14.98	5.05	5.65	63.43	1.29	0.02	0.05	59	35	6	Sandy_loam	Mod_coarse	0.0205	Hyper_arid	825	18.1	59	3195	66	60	3	33	_Sparse_(>15%)_vegetation_(woody_vegetation,_shrubs,_grassland)	LC_14
RT3A	16.9076	-28.1116	South Africa	6.9	Neutral	Neutral	8.9	25.92	3.05	39.21	0.31	0.01	0.05	63	31	6	Sandy_loam	Mod_coarse	0.0151	Hyper_arid	781	18.7	60	2728	82	43	2	37	Bare_areas	LC_19
RT3B	16.908	-28.1113	South Africa	7	Neutral	Neutral	9.77	36.51	2.96	26.07	0.31	0.01	0.04	59	37	4	Sandy_loam	Mod_coarse	0.0151	Hyper_arid	781	18.7	60	2728	82	43	2	37	Bare_areas	LC_19
RT3C	16.9085	-28.1118	South Africa	7	Neutral	Neutral	9.03	16.11	2.8	78.27	0.89	0.01	0.14	61	35	4	Sandy_loam	Mod_coarse	0.0151	Hyper_arid	814	18.7	60	2734	81	43	2	37	_Closed_to_open_(>15%)_grassland	LC_13
RT3D	16.9083	-28.1118	South Africa	7.1	Neutral	Neutral	9.89	33.21	3.05	36.41	0.37	0.01	0.04	60	34	6	Sandy_loam	Mod_coarse	0.0151	Hyper_arid	781	18.7	60	2728	82	43	2	37	Bare_areas	LC_19
SK.CAL1	19.56867	-31.4107	South Africa	8	Alkaline	Moderately_alkaline	28.03	447.9	33.69	2.717	1.3	0.08	0.355	66	30	4	Sandy_loam	Mod_coarse	0.0997	Arid	855	16.2	57	4393	31	240	7	43	_Open_(15-40%)_broadleaved_deciduous_forest_(>5m)	LC_6
SK.CAL2	19.50715	-31.28177	South Africa	7.69	Alkaline	Slightly_alkaline	48.17	305.5	38.89	17.27	4.774	0.14	0.334	49	35	16	Loam	Medium	0.0902	Arid	761	17.6	56	4524	37	207	5	48	_Mosaic_Grassland_(50-70%)_/_Forest/Shrubland_(20-50%)	LC_11
SK.CAL3	19.45327	-31.14701	South Africa	7.29	Neutral	Neutral	60.83	408.2	52.75	12.77	5.967	0.33	2.642	65	27	8	Sandy_loam	Mod_coarse	0.0928	Arid	880	17.1	56	4508	34	220	6	45	_Open_(15-40%)_broadleaved_deciduous_forest_(>5m)	LC_6
SK.CAL4	19.47549	-30.98621	South Africa	8.03	Alkaline	Moderately_alkaline	38.15	278.2	35.59	6.389	2.697	0.13	0.283	59	26	16	Sandy_loam	Mod_coarse	0.0914	Arid	706	16.5	56	4560	28	227	8	37	_Closed_to_open_(>15%)_grassland	LC_13
SK.WI1	19.86364	-31.48176	South Africa	8.4	Alkaline	Moderately_alkaline	40.23	237.2	21.11	35.65	3.69	0.11	0.334	78	18	4	Loamy_sand	Coarse	0.0907	Arid	804	16.3	57	4562	28	207	8	34	_Closed_to_open_(>15%)_grassland	LC_13
ZA10	23.778	-27.3472	South Africa	8.69	Alkaline	Strongly_alkaline	39.01	4694.36	83.5	20.81	1.8	0.04	0.34	92	0	8	Sand	Coarse	0.1959	Arid	2039	17.1	53	5002	2	490	4	76	_Closed_to_open_(>15%)_grassland	LC_13
ZA108	28.1658	-25.5774	South Africa	6.25	Acidic	Slightly_acid	86.88	377.76	79.22	36.48	12.67	0.06	0.68	78	1	21	Sandy_clay_loam	Mod_fine	0.3183	Semi_arid	2993	18	57	4279	15	689	6	77	_Mosaic_Vegetation_(grassland,_shrubland,_forest)_(50-70%)_/_Cropland_(20-50%)__	LC_3
ZA109	27.9684	-25.1708	South Africa	6.94	Neutral	Neutral	317.05	1802.96	249.77	43.04	11.07	0.09	0.87	60	14	25	Sandy_clay_loam	Mod_fine	0.28	Semi_arid	3306	19.6	57	4249	30	585	5	80	_Mosaic_Vegetation_(grassland,_shrubland,_forest)_(50-70%)_/_Cropland_(20-50%)__	LC_3
ZA11	23.2781	-27.5065	South Africa	7.29	Neutral	Neutral	71.35	569.02	76.42	15.27	3.99	0.05	0.33	90	0	10	Sand	Coarse	0.1729	Arid	1682	17.7	52	5039	12	447	3	75	_Mosaic_Forest/Shrubland_(50-70%)_/_Grassland_(20-50%)	LC_10
ZA110	28.2931	-25.085	South Africa	7.51	Alkaline	Slightly_alkaline	114.38	2887.86	448.01	40.7	3.35	0.04	0.35	72	14	14	Loamy_sand	Coarse	0.2927	Semi_arid	2741	19.1	58	4091	29	590	5	80	_Mosaic_Forest/Shrubland_(50-70%)_/_Grassland_(20-50%)	LC_10
ZA111	28.4317	-24.7322	South Africa	6.77	Neutral	Neutral	87.78	266.5	66.19	16.97	6.9	0.04	0.51	88	2	10	Loamy_sand	Coarse	0.297	Semi_arid	3898	18.3	58	4104	20	634	4	80	_Mosaic_Vegetation_(grassland,_shrubland,_forest)_(50-70%)_/_Cropland_(20-50%)__	LC_3
ZA112	28.1296	-24.3976	South Africa	6.44	Acidic	Slightly_acid	33.69	407	39.71	20.53	2.24	0.02	0.24	81	4	15	Loamy_sand	Coarse	0.3021	Semi_arid	4319	18.2	57	4181	16	631	4	83	_Open_(15-40%)_broadleaved_deciduous_forest_(>5m)	LC_6
ZA113	28.3363	-24.0501	South Africa	5.96	Acidic	Moderately_acid	70.29	208.95	74.49	17.88	21.95	0.05	0.56	85	2	13	Loamy_sand	Coarse	0.2861	Semi_arid	4028	18.3	57	3996	24	587	3	85	_Closed_to_open_(>15%)_shrubland_(<5m)	LC_12
ZA114	28.4103	-23.6608	South Africa	5.87	Acidic	Moderately_acid	67.52	214.78	80.78	17.19	11.19	0.04	0.3	85	3	13	Loamy_sand	Coarse	0.2416	Semi_arid	2743	19.8	56	3992	41	495	3	85	_Mosaic_Vegetation_(grassland,_shrubland,_forest)_(50-70%)_/_Cropland_(20-50%)__	LC_3
ZA115	28.5314	-23.3722	South Africa	7.06	Neutral	Neutral	131.43	940.42	215.24	28.22	7.84	0.03	0.42	87	1	12	Loamy_sand	Coarse	0.2321	Semi_arid	3039	20.3	56	3948	49	460	1	87	_Mosaic_Vegetation_(grassland,_shrubland,_forest)_(50-70%)_/_Cropland_(20-50%)__	LC_3
ZA116	28.8649	-23.6525	South Africa	8.17	Alkaline	Moderately_alkaline	535.1	4513.55	574.89	40.09	8.3	0.09	0.68	61	23	17	Sandy_loam	Mod_coarse	0.2445	Semi_arid	3456	19.6	57	3773	47	482	2	83	_Closed_to_open_(>15%)_grassland	LC_13
ZA117	29.2892	-23.7602	South Africa	6.78	Neutral	Neutral	120.49	546.43	217.37	28.98	7.71	0.05	0.35	73	9	18	Sandy_clay_loam	Mod_fine	0.3087	Semi_arid	2566	17.9	57	3548	42	559	4	81	_Closed_to_open_(>15%)_grassland	LC_13
ZA118	29.5978	-23.7004	South Africa	8.11	Alkaline	Moderately_alkaline	556.37	3180.64	1999.4	118.6	16.18	0.15	1.3	29	25	46	Clay	Fine	0.3475	Semi_arid	4312	18	57	3412	45	754	7	79	_Mosaic_Forest/Shrubland_(50-70%)_/_Grassland_(20-50%)	LC_10
ZA119	29.8148	-23.2963	South Africa	7.12	Neutral	Neutral	419.77	1774.23	580.3	84.3	25.1	0.13	1.21	70	7	23	Sandy_clay_loam	Mod_fine	0.4545	Semi_arid	4370	17.9	57	3209	51	906	10	80	_Mosaic_Forest/Shrubland_(50-70%)_/_Grassland_(20-50%)	LC_10
ZA12	23.0421	-27.8161	South Africa	7.8	Alkaline	Slightly_alkaline	115.78	1903.13	149.15	18.72	3.73	0.06	0.54	86	4	10	Loamy_sand	Coarse	0.1548	Arid	1574	18.9	52	5150	24	380	3	77	_Closed_to_open_(>15%)_grassland	LC_13
ZA120	30.1139	-23.0878	South Africa	6.52	Acidic	Slightly_acid	63.92	1062.36	1207	33.91	3.91	0.07	0.82	70	11	19	Sandy_clay_loam	Mod_fine	0.4614	Semi_arid	5364	19.9	59	2867	80	853	12	82	_Mosaic_Vegetation_(grassland,_shrubland,_forest)_(50-70%)_/_Cropland_(20-50%)__	LC_3
ZA121	30.6762	-23.0539	South Africa	7.14	Neutral	Neutral	54.88	1002.49	304.74	31.04	3.52	0.04	0.39	74	6	20	Sandy_clay_loam	Mod_fine	0.381	Semi_arid	3918	21.9	59	2835	103	688	6	85	_Mosaic_Grassland_(50-70%)_/_Forest/Shrubland_(20-50%)	LC_11
ZA122	30.731	-23.5283	South Africa	6.38	Acidic	Slightly_acid	101.1	1022.65	413.41	29.29	8.5	0.07	0.77	70	8	22	Sandy_clay_loam	Mod_fine	0.3189	Semi_arid	4122	21.8	58	3204	87	562	5	84	_Mosaic_Vegetation_(grassland,_shrubland,_forest)_(50-70%)_/_Cropland_(20-50%)__	LC_3
ZA123	30.4017	-23.8357	South Africa	6.54	Acidic	Slightly_acid	98.4	486.91	138.2	53.52	8.56	0.08	0.92	82	8	10	Loamy_sand	Coarse	0.3012	Semi_arid	4895	21.6	59	3463	74	637	8	79	_Open_(15-40%)_broadleaved_deciduous_forest_(>5m)	LC_6
ZA124	30.6682	-24.0025	South Africa	6.68	Neutral	Neutral	173.45	892.7	225.01	27.34	5.59	0.09	0.94	81	7	12	Loamy_sand	Coarse	0.3011	Semi_arid	3805	21.7	59	3288	79	559	7	74	_Mosaic_Vegetation_(grassland,_shrubland,_forest)_(50-70%)_/_Cropland_(20-50%)__	LC_3
ZA125	29.8944	-23.9391	South Africa	6.8	Neutral	Neutral	33.07	1966.28	389.69	31.68	4.96	0.2	1.41	67	21	12	Sandy_loam	Mod_coarse	0.65	Dry_sub_humid	5447	14.7	59	2773	25	988	11	78	_Closed_to_open_(>15%)_shrubland_(<5m)	LC_12
ZA126	29.4769	-24.2471	South Africa	7.09	Neutral	Neutral	268.43	1991.84	277.45	23.13	13.13	0.14	1.73	67	17	16	Sandy_loam	Mod_coarse	0.3303	Semi_arid	3292	17.8	57	3573	37	630	4	78	_Mosaic_Vegetation_(grassland,_shrubland,_forest)_(50-70%)_/_Cropland_(20-50%)__	LC_3
ZA127	29.1564	-24.5259	South Africa	8.61	Alkaline	Strongly_alkaline	444.28	8005.95	922.74	57.73	11.2	0.09	1.27	60	22	17	Sandy_loam	Mod_coarse	0.2512	Semi_arid	2075	19.9	57	4057	40	524	2	81	_Closed_to_open_(>15%)_grassland	LC_13
ZA128	28.7395	-24.8808	South Africa	7.35	Neutral	Neutral	245.83	4341.02	377.02	94.86	2.86	0.17	1.66	42	22	36	Clay_loam	Mod_fine	0.2617	Semi_arid	1236	19.1	59	4049	30	600	4	79	_Closed_to_open_(>15%)_grassland	LC_13
ZA129	28.2847	-25.5391	South Africa	6.83	Neutral	Neutral	95.92	1279.6	119.83	19.14	47.83	0.14	1.64	86	6	8	Loamy_sand	Coarse	0.2999	Semi_arid	3176	17.9	57	4183	19	678	6	77	_Mosaic_Vegetation_(grassland,_shrubland,_forest)_(50-70%)_/_Cropland_(20-50%)__	LC_3
ZA13	22.6611	-28.0279	South Africa	8.37	Alkaline	Moderately_alkaline	108.95	1984.2	172.04	18.87	36.17	0.06	0.44	78	8	14	Loamy_sand	Coarse	0.1407	Arid	1623	17.7	50	5482	6	330	4	76	_Closed_to_open_(>15%)_grassland	LC_13
ZA14	22.2173	-28.2159	South Africa	8.65	Alkaline	Strongly_alkaline	99.23	1005.92	165.46	28.3	5.47	0.02	0.13	91	2	7	Sand	Coarse	0.1127	Arid	1543	19	51	5430	20	258	4	74	_Closed_to_open_(>15%)_grassland	LC_13
ZA15	21.7468	-28.3733	South Africa	8.62	Alkaline	Strongly_alkaline	57.71	1114.25	160.54	15.29	23.8	0.03	0.2	95	0	5	Sand	Coarse	0.0897	Arid	1745	19.3	51	5441	25	216	3	71	_Closed_to_open_(>15%)_grassland	LC_13
ZA16	21.1834	-28.4873	South Africa	8.88	Alkaline	Strongly_alkaline	42.56	1159.62	87.84	9.86	18.12	0.01	0.03	94	0	6	Sand	Coarse	0.0778	Arid	1992	19.4	54	5290	27	175	2	75	_Closed_to_open_(>15%)_grassland	LC_13
ZA17	20.8278	-28.7399	South Africa	8.81	Alkaline	Strongly_alkaline	77.96	5942.38	149.55	31.25	25.81	0.03	0.07	84	1	16	Loamy_sand	Coarse	0.0645	Arid	1800	20	53	5290	33	146	3	67	_Closed_to_open_(>15%)_grassland	LC_13
ZA18	20.4128	-28.819	South Africa	8.89	Alkaline	Strongly_alkaline	260.13	1308.62	193.04	42.21	72.38	0.03	0.1	87	5	8	Loamy_sand	Coarse	0.0669	Arid	1406	19.6	53	5244	32	177	3	71	_Bare_areas	LC_19
ZA19	19.911	-28.8792	South Africa	9.21	Alkaline	Very_strongly_alkaline	147.24	2002.9	236.34	107.39	69.55	0.02	0.12	82	6	12	Loamy_sand	Coarse	0.0784	Arid	1052	19	53	5206	32	209	2	73	_Bare_areas	LC_19
ZA2	27.2703	-26.2458	South Africa	7.63	Alkaline	Slightly_alkaline	84.3	1429.31	82.38	16.09	6.28	0.07	0.81	75	8	17	Sandy_clay_loam	Mod_fine	0.3441	Semi_arid	3442	15.9	55	4371	1	667	7	74	_Mosaic_Vegetation_(grassland,_shrubland,_forest)_(50-70%)_/_Cropland_(20-50%)__	LC_3
ZA20	19.4821	-29.1037	South Africa	8.47	Alkaline	Moderately_alkaline	165.37	931.4	213.88	42.8	63.6	0.02	0.09	86	7	8	Loamy_sand	Coarse	0.0695	Arid	1253	18.9	52	5153	38	181	3	57	_Bare_areas	LC_19
ZA21	19.0023	-29.1923	South Africa	8.45	Alkaline	Moderately_alkaline	122.99	1166.75	178.35	26.19	36	0.02	0.05	90	0	10	Sand	Coarse	0.055	Arid	1457	19.2	53	5138	41	140	4	47	_Bare_areas	LC_19
ZA22	18.5701	-29.4174	South Africa	8.83	Alkaline	Strongly_alkaline	91.55	2372.04	160.38	25.21	39.38	0.02	0.03	90	2	8	Sand	Coarse	0.0563	Arid	1279	18.6	54	4920	43	149	8	27	_Bare_areas	LC_19
ZA23	18.1006	-29.5604	South Africa	8.54	Alkaline	Strongly_alkaline	150.12	766.66	279.96	76.8	42.27	0.02	0.09	83	5	12	Loamy_sand	Coarse	0.0628	Arid	1326	17.4	55	4387	50	178	5	48	_Closed_to_open_(>15%)_grassland	LC_13
ZA24	17.8733	-29.8612	South Africa	8.82	Alkaline	Strongly_alkaline	83.76	422.31	174.6	91.38	31.99	0.01	0.03	87	5	8	Loamy_sand	Coarse	0.0624	Arid	1292	17.3	56	3839	56	167	3	64	_Closed_to_open_(>15%)_grassland	LC_13
ZA25	17.9029	-30.2203	South Africa	7.39	Alkaline	Slightly_alkaline	51.29	585.78	190.35	33.96	19.16	0.03	0.2	81	7	12	Loamy_sand	Coarse	0.0781	Arid	1046	16.1	57	3678	44	205	4	59	_Closed_to_open_(>15%)_grassland	LC_13
ZA26	18.0193	-30.6078	South Africa	7.65	Alkaline	Slightly_alkaline	116.58	1062.71	256.26	86.87	90.79	0.04	0.45	83	9	8	Loamy_sand	Coarse	0.069	Arid	1265	18.6	60	3547	62	158	3	58	_Closed_to_open_(>15%)_grassland	LC_13
ZA27	18.2393	-30.976	South Africa	7.8	Alkaline	Slightly_alkaline	279.7	3914.27	581.3	239.92	63.03	0.08	0.81	74	14	12	Loamy_sand	Coarse	0.0848	Arid	1143	17.9	59	3688	61	178	2	66	_Closed_to_open_(>15%)_grassland	LC_13
ZA28	18.5644	-31.285	South Africa	7.8	Alkaline	Slightly_alkaline	508.78	3745.74	1058.98	830.12	102.41	0.06	0.58	50	34	16	Loam	Medium	0.0889	Arid	1169	18.8	59	3765	65	167	2	65	_Closed_to_open_(>15%)_grassland	LC_13
ZA29	18.6997	-31.6777	South Africa	9.23	Alkaline	Very_strongly_alkaline	379.51	4250.46	387.42	123.17	34.05	0.05	0.29	80	12	8	Loamy_sand	Coarse	0.1012	Arid	1501	19.4	60	3607	73	175	2	70	_Closed_to_open_(>15%)_grassland	LC_13
ZA3	26.8031	-26.3324	South Africa	6.87	Neutral	Neutral	72.33	497.35	102.09	9.5	1.93	0.05	0.66	74	6	21	Sandy_clay_loam	Mod_fine	0.2987	Semi_arid	3575	16	54	4616	-6	608	5	76	_Closed_to_open_(>15%)_shrubland_(<5m)	LC_12
ZA30	18.7889	-32.0275	South Africa	6.87	Neutral	Neutral	11.97	113.36	30.71	17.74	12.57	0.01	0.2	96	0	4	Sand	Coarse	0.105	Arid	897	19.1	58	4186	61	214	4	70	_Closed_to_open_(>15%)_grassland	LC_13
ZA31	18.953	-32.3999	South Africa	5.83	Acidic	Moderately_acid	64.6	376.22	80.07	42.58	12.99	0.05	0.9	85	3	12	Loamy_sand	Coarse	0.1273	Arid	2855	18.9	56	4594	52	261	6	67	_Closed_(>40%)_broadleaved_deciduous_forest_(>5m)	LC_5
ZA32	18.8463	-32.8137	South Africa	6.43	Acidic	Slightly_acid	141.22	508.26	70.34	44.77	15.07	0.08	0.82	68	16	16	Sandy_loam	Mod_coarse	0.1823	Arid	1333	17.7	54	4126	55	387	8	62	_Closed_(>40%)_broadleaved_deciduous_forest_(>5m)	LC_5
ZA33	18.6778	-32.1902	South Africa	6.45	Acidic	Slightly_acid	146.65	935.67	164.73	63.21	31.19	0.11	1.19	77	10	12	Loamy_sand	Coarse	0.1221	Arid	1513	18.1	58	4032	57	264	5	64	_Closed_to_open_(>15%)_grassland	LC_13
ZA36	19.6852	-34.5297	South Africa	5.44	Acidic	Strongly_acid	38.65	227.65	92.08	32.83	8.03	0.09	0.82	81	6	12	Loamy_sand	Coarse	0.3637	Semi_arid	2423	15.9	53	2729	76	543	24	35	_Closed_(>40%)_broadleaved_deciduous_forest_(>5m)	LC_5
ZA37	19.8875	-34.7258	South Africa	5.89	Acidic	Moderately_acid	320.79	1239	524.54	108.84	6.53	0.29	2.37	30	38	32	Clay_loam	Mod_fine	0.3353	Semi_arid	2204	16.7	50	2550	94	505	20	38	_Closed_to_open_(>15%)_shrubland_(<5m)	LC_12
ZA39	20.4248	-34.3779	South Africa	5.63	Acidic	Moderately_acid	113.18	1061.91	603.99	213.27	29.08	0.34	3.3	48	25	27	Sandy_clay_loam	Mod_fine	0.2667	Semi_arid	1499	17.5	52	3337	70	548	29	23	_Rainfed_croplands	LC_1
ZA4	26.3457	-26.3308	South Africa	8.47	Alkaline	Moderately_alkaline	101.43	4320.03	584.44	34.36	14.37	0.08	0.87	68	12	20	Sandy_loam	Mod_coarse	0.29	Semi_arid	3824	16.7	55	4304	11	616	5	75	_Closed_to_open_(>15%)_grassland	LC_13
ZA40	28.2368	-26.0472	South Africa	6.48	Acidic	Slightly_acid	226.25	1276.28	421.95	26.64	33.25	0.16	1.53	56	18	26	Sandy_clay_loam	Mod_fine	0.395	Semi_arid	2597	16	57	3590	23	723	6	75	_Artificial_surfaces_and_associated_areas_(urban_areas_>50%)_GLOBCOVER_2009	LC_18
ZA41	28.5608	-26.6638	South Africa	5.88	Acidic	Moderately_acid	326.39	991.18	291.49	26.39	5.96	0.18	1.65	45	15	41	Clay	Fine	0.3572	Semi_arid	5755	15.4	56	4187	-7	694	7	73	_Mosaic_Vegetation_(grassland,_shrubland,_forest)_(50-70%)_/_Cropland_(20-50%)__	LC_3
ZA42	28.9545	-26.7617	South Africa	7.17	Neutral	Neutral	140.96	5667.86	1584.62	59.67	8.58	0.12	1.26	46	24	31	Sandy_clay_loam	Mod_fine	0.3729	Semi_arid	3668	15.6	57	4074	-5	676	7	74	_Mosaic_Vegetation_(grassland,_shrubland,_forest)_(50-70%)_/_Cropland_(20-50%)__	LC_3
ZA43	29.1092	-26.3834	South Africa	6.03	Acidic	Moderately_acid	164.98	1597.49	410.66	31.3	4.51	0.18	1.72	66	12	23	Sandy_clay_loam	Mod_fine	0.3785	Semi_arid	4957	15.5	57	4019	0	691	7	75	_Mosaic_Vegetation_(grassland,_shrubland,_forest)_(50-70%)_/_Cropland_(20-50%)__	LC_3
ZA44	29.0797	-26.0446	South Africa	7.04	Neutral	Neutral	148.63	646.07	170.25	17.42	42.1	0.09	1.11	76	3	21	Sandy_clay_loam	Mod_fine	0.3741	Semi_arid	3709	15.4	57	4008	-1	697	7	75	_Open_(15-40%)_broadleaved_deciduous_forest_(>5m)	LC_6
ZA45	29.5072	-25.8302	South Africa	6.07	Acidic	Moderately_acid	90.24	875.14	156.48	17.57	2.47	0.15	1.96	58	19	23	Sandy_clay_loam	Mod_fine	0.3824	Semi_arid	3165	15.1	57	4177	-10	698	5	73	_Open_(15-40%)_broadleaved_deciduous_forest_(>5m)	LC_6
ZA46	29.9274	-25.9012	South Africa	6.24	Acidic	Slightly_acid	46.09	456	76.53	15.08	4.2	0.07	0.84	76	8	17	Sandy_clay_loam	Mod_fine	0.4339	Semi_arid	4724	14.5	58	3685	1	760	6	74	_Mosaic_Vegetation_(grassland,_shrubland,_forest)_(50-70%)_/_Cropland_(20-50%)__	LC_3
ZA47	29.9898	-26.2315	South Africa	4.56	Acidic	Very_strongly_acid	53.97	122.5	31.45	16.19	9.59	0.11	1.26	78	9	13	Loamy_sand	Coarse	0.4436	Semi_arid	3742	14.5	57	3539	7	756	5	76	_Mosaic_Vegetation_(grassland,_shrubland,_forest)_(50-70%)_/_Cropland_(20-50%)__	LC_3
ZA48	29.8895	-26.5844	South Africa	6.21	Acidic	Slightly_acid	81.36	781.63	384.84	75.78	2.32	0.08	0.86	80	7	14	Loamy_sand	Coarse	0.4021	Semi_arid	3770	14.8	56	3771	3	733	4	76	_Mosaic_Vegetation_(grassland,_shrubland,_forest)_(50-70%)_/_Cropland_(20-50%)__	LC_3
ZA5	25.9077	-26.3823	South Africa	8.63	Alkaline	Strongly_alkaline	192.81	4949.24	539.75	26.29	22.95	0.17	1.37	75	7	18	Sandy_clay_loam	Mod_fine	0.2824	Semi_arid	3451	17.3	55	4491	13	585	3	75	_Closed_to_open_(>15%)_grassland	LC_13
ZA50	29.4068	-27.059	South Africa	7.12	Neutral	Neutral	208.43	2600.84	716.76	43.84	22.19	0.14	1.13	62	17	21	Sandy_clay_loam	Mod_fine	0.4034	Semi_arid	5263	14.7	56	4179	-10	685	6	74	_Mosaic_Vegetation_(grassland,_shrubland,_forest)_(50-70%)_/_Cropland_(20-50%)__	LC_3
ZA51	29.8203	-27.3088	South Africa	6.62	Neutral	Neutral	160.96	4220.06	1326.39	85.45	10.07	0.35	2.94	24	30	46	Clay	Fine	0.4604	Semi_arid	3849	14.7	56	3924	-1	776	8	70	_Mosaic_Vegetation_(grassland,_shrubland,_forest)_(50-70%)_/_Cropland_(20-50%)__	LC_3
ZA52	29.9884	-27.6483	South Africa	5.95	Acidic	Moderately_acid	58.32	326.64	74.86	18.66	6.36	0.06	0.7	82	6	12	Loamy_sand	Coarse	0.4155	Semi_arid	3838	17.4	58	3880	19	779	9	70	_Mosaic_Vegetation_(grassland,_shrubland,_forest)_(50-70%)_/_Cropland_(20-50%)__	LC_3
ZA53	30.4104	-27.7838	South Africa	6.74	Neutral	Neutral	175.48	1530.68	303.47	26.1	8.84	0.09	1.13	78	9	13	Loamy_sand	Coarse	0.4702	Semi_arid	3395	16.9	59	3405	30	832	9	70	_Mosaic_Vegetation_(grassland,_shrubland,_forest)_(50-70%)_/_Cropland_(20-50%)__	LC_3
ZA54	30.9818	-27.7429	South Africa	5.71	Acidic	Moderately_acid	94.1	284.32	85.66	21.93	10.16	0.19	1.8	74	9	17	Sandy_clay_loam	Mod_fine	0.527	Dry_sub_humid	3386	16.9	62	2528	58	913	11	65	_Mosaic_Vegetation_(grassland,_shrubland,_forest)_(50-70%)_/_Cropland_(20-50%)__	LC_3
ZA55	31.4041	-27.8257	South Africa	5.24	Acidic	Strongly_acid	41.72	315.38	125.43	30.01	4.18	0.23	1.26	60	25	15	Sandy_loam	Mod_coarse	0.5663	Dry_sub_humid	4971	16.2	60	2390	65	916	16	61	_Closed_to_open_(>15%)_shrubland_(<5m)	LC_12
ZA56	31.7031	-27.9028	South Africa	6.04	Acidic	Moderately_acid	86.93	530.87	263.51	67.55	11.15	0.07	0.73	79	9	12	Loamy_sand	Coarse	0.5429	Dry_sub_humid	3833	19.1	61	2389	92	860	19	56	_Mosaic_Vegetation_(grassland,_shrubland,_forest)_(50-70%)_/_Cropland_(20-50%)__	LC_3
ZA57	31.921	-28.1931	South Africa	6.95	Neutral	Neutral	130.38	2723.46	653.74	85.48	2.77	0.09	0.84	66	12	21	Sandy_clay_loam	Mod_fine	0.608	Dry_sub_humid	4792	20.3	60	2307	109	891	27	46	_Mosaic_Vegetation_(grassland,_shrubland,_forest)_(50-70%)_/_Cropland_(20-50%)__	LC_3
ZA58	32.2058	-28.357	South Africa	6.28	Acidic	Slightly_acid	181.48	1371.17	330.87	62.09	5.67	0.16	1.66	72	2	26	Sandy_clay_loam	Mod_fine	0.6993	Humid	4923	21.7	53	2720	119	962	42	35	_Closed_(>40%)_broadleaved_deciduous_forest_(>5m)	LC_5
ZA59	32.3056	-28.0105	South Africa	6.77	Neutral	Neutral	233.58	3532.42	1580.68	121.42	4.25	0.17	1.61	29	23	47	Clay	Fine	0.5853	Dry_sub_humid	4048	21.4	53	2872	107	897	32	41	_Open_(15-40%)_broadleaved_deciduous_forest_(>5m)	LC_6
ZA6	25.5578	-26.629	South Africa	8.52	Alkaline	Strongly_alkaline	201.22	7798.59	233.19	25.42	8.89	0.12	1.17	67	9	24	Sandy_clay_loam	Mod_fine	0.2523	Semi_arid	2352	17.5	52	4844	1	518	3	75	_Closed_to_open_(>15%)_grassland	LC_13
ZA60	32.4237	-27.6376	South Africa	7.63	Alkaline	Slightly_alkaline	141.33	3324.93	194.3	39.44	12.13	0.06	0.42	85	2	13	Loamy_sand	Coarse	0.4871	Semi_arid	5218	22.1	55	2911	107	811	25	48	_Closed_(>40%)_broadleaved_deciduous_forest_(>5m)	LC_5
ZA61	32.5534	-27.0971	South Africa	7.98	Alkaline	Moderately_alkaline	23.13	1806.35	66.72	28.48	13.14	0.04	0.48	93	1	6	Sand	Coarse	0.4568	Semi_arid	3244	22.4	57	2678	117	803	21	54	_Closed_to_open_(>15%)_grassland	LC_13
ZA62	31.8682	-28.8399	South Africa	6.95	Neutral	Neutral	96.03	1502.71	343.35	59.2	11.92	0.16	2.04	74	5	21	Sandy_clay_loam	Mod_fine	0.6969	Humid	4469	21.7	54	2824	111	1088	44	36	_Mosaic_Vegetation_(grassland,_shrubland,_forest)_(50-70%)_/_Cropland_(20-50%)__	LC_3
ZA63	31.5155	-29.0881	South Africa	6.13	Acidic	Slightly_acid	175.85	2351.64	1209.06	96.37	7.45	0.25	2.49	34	27	40	Clay_loam	Mod_fine	0.6713	Humid	4436	21.1	55	2636	111	1047	36	41	_Mosaic_Vegetation_(grassland,_shrubland,_forest)_(50-70%)_/_Cropland_(20-50%)__	LC_3
ZA64	31.2806	-29.4113	South Africa	6.04	Acidic	Moderately_acid	103	774.62	447.32	72.56	22.41	0.15	1.45	68	7	25	Sandy_clay_loam	Mod_fine	0.667	Humid	4116	20.9	55	2537	112	995	34	42	_Mosaic_Vegetation_(grassland,_shrubland,_forest)_(50-70%)_/_Cropland_(20-50%)__	LC_3
ZA65	30.3106	-30.7258	South Africa	5.45	Acidic	Strongly_acid	113.04	457.63	165.45	38.81	48.22	0.1	1.61	68	9	23	Sandy_clay_loam	Mod_fine	0.662	Humid	4830	17.9	57	2223	94	1130	32	43	_Closed_(>40%)_broadleaved_deciduous_forest_(>5m)	LC_5
ZA66	29.969	-30.6004	South Africa	5.38	Acidic	Strongly_acid	73.35	334.66	187.89	54.44	5.09	0.27	3.25	31	29	40	Clay_loam	Mod_fine	0.585	Dry_sub_humid	5463	16.6	57	2943	47	912	20	56	_Closed_(>40%)_broadleaved_deciduous_forest_(>5m)	LC_5
ZA67	29.5581	-30.5096	South Africa	6.04	Acidic	Moderately_acid	222.11	2253.6	307.98	44.65	24.14	0.25	2.68	27	39	34	Clay_loam	Mod_fine	0.5675	Dry_sub_humid	5492	14	58	3460	3	852	13	64	_Closed_to_open_(>15%)_shrubland_(<5m)	LC_12
ZA68	29.1615	-30.4341	South Africa	6.5	Acidic	Slightly_acid	218.19	2719.29	830.84	41.04	24.39	0.13	1.44	52	17	31	Sandy_clay_loam	Mod_fine	0.492	Semi_arid	4634	14.1	58	3591	3	821	12	70	_Mosaic_Vegetation_(grassland,_shrubland,_forest)_(50-70%)_/_Cropland_(20-50%)__	LC_3
ZA69	28.666	-30.4204	South Africa	7.12	Neutral	Neutral	73.61	2520.09	817.16	63.8	2.84	0.11	0.79	65	11	25	Sandy_clay_loam	Mod_fine	0.4023	Semi_arid	2730	16	60	3335	36	694	13	66	_Closed_to_open_(>15%)_grassland	LC_13
ZA7	25.1449	-26.8252	South Africa	8.43	Alkaline	Moderately_alkaline	273.27	4985.2	186.69	22.35	7.38	0.11	1.02	79	5	16	Sandy_clay_loam	Mod_fine	0.2322	Semi_arid	2725	17.4	51	5229	-11	474	3	77	_Closed_to_open_(>15%)_grassland	LC_13
ZA70	28.5235	-30.7632	South Africa	5.96	Acidic	Moderately_acid	183.35	635.32	261.02	35.48	6.6	0.09	0.89	45	18	37	Clay_loam	Mod_fine	0.4309	Semi_arid	4362	15.6	56	3667	20	756	13	66	_Mosaic_Vegetation_(grassland,_shrubland,_forest)_(50-70%)_/_Cropland_(20-50%)__	LC_3
ZA71	28.2782	-31.1509	South Africa	5.88	Acidic	Moderately_acid	144.37	561.44	212.79	31.38	11.08	0.11	1.21	55	20	25	Sandy_clay_loam	Mod_fine	0.4516	Semi_arid	3714	15.2	53	4025	1	765	13	65	_Closed_(>40%)_broadleaved_deciduous_forest_(>5m)	LC_5
ZA72	27.8942	-31.3485	South Africa	6.08	Acidic	Moderately_acid	105.26	1226.01	394.97	48.74	4.22	0.09	1.11	45	30	25	Loam	Medium	0.3813	Semi_arid	3344	14.7	55	3751	11	681	13	59	_Mosaic_Vegetation_(grassland,_shrubland,_forest)_(50-70%)_/_Cropland_(20-50%)__	LC_3
ZA73	27.6705	-31.0738	South Africa	6.54	Acidic	Slightly_acid	343.52	4337.18	1073.21	52.52	44.13	0.21	2.14	59	20	21	Sandy_clay_loam	Mod_fine	0.3821	Semi_arid	4273	12.4	53	4273	-14	661	14	54	_Closed_to_open_(>15%)_grassland	LC_13
ZA74	27.3779	-31.4455	South Africa	6.58	Acidic	Slightly_acid	215.98	1266.22	386.15	34.83	5.98	0.11	1.34	70	7	23	Sandy_clay_loam	Mod_fine	0.3314	Semi_arid	2878	15.2	55	3902	18	599	12	58	_Mosaic_Vegetation_(grassland,_shrubland,_forest)_(50-70%)_/_Cropland_(20-50%)__	LC_3
ZA75	27.0416	-31.447	South Africa	6.52	Acidic	Slightly_acid	314.2	2489.78	711.63	43.3	16.41	0.16	1.7	57	18	25	Sandy_clay_loam	Mod_fine	0.3624	Semi_arid	3324	12.6	51	4498	-20	620	17	49	_Mosaic_Vegetation_(grassland,_shrubland,_forest)_(50-70%)_/_Cropland_(20-50%)__	LC_3
ZA77	27.1183	-32.1418	South Africa	7.46	Alkaline	Slightly_alkaline	137.61	1972.62	286.76	48.95	6.38	0.09	0.8	73	7	20	Sandy_clay_loam	Mod_fine	0.3153	Semi_arid	3237	17.3	58	3454	49	583	12	56	_Mosaic_Forest/Shrubland_(50-70%)_/_Grassland_(20-50%)	LC_10
ZA78	27.3837	-32.4677	South Africa	6.09	Acidic	Moderately_acid	281.44	812.32	258.21	33.07	10.33	0.14	1.47	48	19	33	Sandy_clay_loam	Mod_fine	0.4107	Semi_arid	4382	15.1	61	2646	56	874	21	51	_Mosaic_Vegetation_(grassland,_shrubland,_forest)_(50-70%)_/_Cropland_(20-50%)__	LC_3
ZA79	27.3709	-32.8012	South Africa	6.79	Neutral	Neutral	310.27	2026.77	466.34	52.25	36.24	0.13	1.52	50	28	23	Loam	Medium	0.4156	Semi_arid	3547	18.1	58	3047	65	590	17	44	_Open_(15-40%)_broadleaved_deciduous_forest_(>5m)	LC_6
ZA8	24.68	-26.9822	South Africa	8.5	Alkaline	Strongly_alkaline	124.98	4778.54	90.44	21.15	8.01	0.09	0.84	86	2	12	Loamy_sand	Coarse	0.2148	Semi_arid	2151	17.9	52	5237	-1	481	4	76	_Closed_to_open_(>15%)_grassland	LC_13
ZA80	27.1463	-33.1285	South Africa	7.6	Alkaline	Slightly_alkaline	205.8	1355.87	313.49	57.93	9.11	0.13	1.36	44	26	30	Clay_loam	Mod_fine	0.3755	Semi_arid	2800	17.9	57	2838	68	596	26	30	_Open_(15-40%)_broadleaved_deciduous_forest_(>5m)	LC_6
ZA81	27.3067	-33.3768	South Africa	7.06	Neutral	Neutral	122.51	1231.65	164.04	66.19	9.87	0.08	0.96	85	2	13	Loamy_sand	Coarse	0.437	Semi_arid	3109	18.5	56	2300	97	601	34	23	_Closed_(>40%)_broadleaved_deciduous_forest_(>5m)	LC_5
ZA82	26.8485	-33.6047	South Africa	6.79	Neutral	Neutral	129.95	1632.04	231.95	57.04	19.77	0.17	1.59	67	10	22	Sandy_clay_loam	Mod_fine	0.4285	Semi_arid	4048	18	58	2080	103	607	42	18	_Closed_(>40%)_broadleaved_deciduous_forest_(>5m)	LC_5
ZA83	26.3433	-33.6439	South Africa	6.04	Acidic	Moderately_acid	210.21	863.77	216.83	71.14	28.61	0.11	1.14	76	8	16	Sandy_clay_loam	Mod_fine	0.3922	Semi_arid	2859	17.7	60	2179	87	587	40	16	_Mosaic_Vegetation_(grassland,_shrubland,_forest)_(50-70%)_/_Cropland_(20-50%)__	LC_3
ZA85	25.4355	-33.9499	South Africa	6.3	Acidic	Slightly_acid	49.39	613.8	210.73	64.93	7.44	0.13	1.75	80	6	14	Sandy_loam	Mod_coarse	0.3646	Semi_arid	2948	17	56	2621	71	559	37	16	_Closed_(>40%)_broadleaved_deciduous_forest_(>5m)	LC_5
ZA86	24.8406	-34.0242	South Africa	5.79	Acidic	Moderately_acid	56.85	790.29	174.49	74.04	14.82	0.13	2.05	77	9	14	Sandy_loam	Mod_coarse	0.4456	Semi_arid	1979	16.3	56	2289	78	665	41	17	_Open_(15-40%)_broadleaved_deciduous_forest_(>5m)	LC_6
ZA87	24.3226	-33.949	South Africa	5.62	Acidic	Moderately_acid	100.95	1112.14	331.93	122.99	8.31	0.15	2.29	48	33	19	Loam	Medium	0.4526	Semi_arid	4131	16.1	56	2531	69	862	61	13	_Closed_(>40%)_broadleaved_deciduous_forest_(>5m)	LC_5
ZA88	23.7523	-33.812	South Africa	6.25	Acidic	Slightly_acid	91.7	2263.99	659.92	115.69	26.64	0.28	6.38	47	32	21	Loam	Medium	0.3949	Semi_arid	2054	15.3	57	2882	53	869	52	13	_Closed_to_open_(>15%)_shrubland_(<5m)	LC_12
ZA9	24.2309	-27.1532	South Africa	8.37	Alkaline	Moderately_alkaline	124.12	6661.05	199.62	40.18	6.35	0.08	0.62	85	3	12	Loamy_sand	Coarse	0.2094	Semi_arid	2427	16.9	54	4997	0	500	5	76	_Closed_to_open_(>15%)_grassland	LC_13
ZA90	22.8703	-33.7608	South Africa	7.96	Alkaline	Moderately_alkaline	28.86	2018.89	139.57	48.08	27.51	0.06	0.86	91	1	8	Sand	Coarse	0.3077	Semi_arid	1921	15.2	57	2812	57	746	46	11	_Open_(15-40%)_broadleaved_deciduous_forest_(>5m)	LC_6
ZA91	22.3398	-33.8096	South Africa	7.14	Neutral	Neutral	181.23	2523.69	259.23	69.39	81.19	0.21	2.07	56	30	14	Sandy_loam	Mod_coarse	0.2503	Semi_arid	2039	15.4	57	3199	45	534	35	11	_Open_(15-40%)_broadleaved_deciduous_forest_(>5m)	LC_6
ZA92	22.0043	-33.5941	South Africa	8.58	Alkaline	Strongly_alkaline	492.51	4524.85	681.77	104.08	127.56	0.11	1.03	70	15	16	Sandy_loam	Mod_coarse	0.1512	Arid	1537	17.4	55	3950	37	250	15	14	_Closed_to_open_(>15%)_grassland	LC_13
ZA93	21.5427	-33.4732	South Africa	6.07	Acidic	Moderately_acid	43.32	428.98	77.58	20.13	32.3	0.06	0.59	79	10	12	Loamy_sand	Coarse	0.1612	Arid	1529	15	59	3666	20	275	19	15	_Mosaic_Vegetation_(grassland,_shrubland,_forest)_(50-70%)_/_Cropland_(20-50%)__	LC_3
ZA94	21.079	-33.6039	South Africa	8.21	Alkaline	Moderately_alkaline	122.55	2895.15	327.81	93.55	112.4	0.15	0.81	59	24	17	Sandy_loam	Mod_coarse	0.152	Arid	882	16.5	57	3870	30	294	19	18	_Closed_to_open_(>15%)_grassland	LC_13
ZA95	20.7917	-33.8578	South Africa	6.87	Neutral	Neutral	58.03	1280.46	938.47	92.31	46.55	0.09	0.71	68	12	20	Sandy_loam	Mod_coarse	0.1731	Arid	1136	16.4	56	3904	35	411	25	18	_Closed_(>40%)_broadleaved_deciduous_forest_(>5m)	LC_5
ZA96	20.2699	-33.8724	South Africa	6.7	Neutral	Neutral	81.3	1614.97	1456.94	450.77	15.11	0.11	0.76	46	26	28	Sandy_clay_loam	Mod_fine	0.19	Arid	1170	17.1	53	4224	41	411	21	26	_Closed_to_open_(>15%)_grassland	LC_13
ZAM1	27.7838889	-15.13343694	Zambia	6.46	Acidic	Slightly_acid	83.94	340.61	108.86	15.21	10.83	0.06	0.8	79	3	18	Sandy_clay_loam	Mod_fine	0.3978	Semi_arid	4052	21.3	55	2794	80	866	0	119	_Closed_to_open_(>15%)_grassland	LC_13
ZAM10	27.48340722	-12.33347778	Zambia	5.66	Acidic	Moderately_acid	32.1	178.46	33.7	9.46	25.76	0.09	1.33	73	6	20	Sandy_clay_loam	Mod_fine	0.6398	Dry_sub_humid	4606	19.7	57	2446	52	1274	0	108	_Closed_(>40%)_broadleaved_deciduous_forest_(>5m)	LC_5
ZAM100	27.501925	-17.4001575	Zambia	6.83	Neutral	Neutral	34.01	616.58	53.74	20.5	10.54	0.05	0.44	92	2	6	Sand	Coarse	0.311	Semi_arid	-113	24.9	55	2815	113	762	0	116	_Open_(15-40%)_broadleaved_deciduous_forest_(>5m)	LC_6
ZAM101	27.125278	-17.46671222	Zambia	6.52	Acidic	Slightly_acid	218.58	2374.5	442.2	48.69	14.85	0.19	1.42	60	10	30	Sandy_clay_loam	Mod_fine	0.3091	Semi_arid	3339	24.4	55	2839	105	769	0	115	_Open_(15-40%)_broadleaved_deciduous_forest_(>5m)	LC_6
ZAM11	27.05018306	-12.33334528	Zambia	5.84	Acidic	Moderately_acid	91.2	647.72	83.07	15.1	48.5	0.14	1.53	65	9	26	Sandy_clay_loam	Mod_fine	0.6565	Humid	4463	19.4	57	2451	51	1279	0	105	_Open_(15-40%)_broadleaved_deciduous_forest_(>5m)	LC_6
ZAM12	26.147222	-12.20019472	Zambia	6.01	Acidic	Moderately_acid	78.35	710.1	96.07	11.53	14.14	0.13	1.88	56	16	28	Sandy_clay_loam	Mod_fine	0.6838	Humid	4233	19.5	58	2443	51	1290	0	101	_Closed_(>40%)_broadleaved_deciduous_forest_(>5m)	LC_5
ZAM13	26.26680528	-12.30008389	Zambia	6.22	Acidic	Slightly_acid	107.7	641.74	200.17	17.49	15.71	0.25	2.06	56	17	27	Sandy_clay_loam	Mod_fine	0.666	Humid	5347	19.4	58	2470	50	1284	0	101	_Open_(15-40%)_broadleaved_deciduous_forest_(>5m)	LC_6
ZAM14	26.03359806	-12.66673417	Zambia	5.93	Acidic	Moderately_acid	106.47	463.05	128.65	18.1	14.14	0.14	1.9	55	18	27	Sandy_clay_loam	Mod_fine	0.6235	Dry_sub_humid	4770	19.6	58	2433	54	1239	0	102	_Open_(15-40%)_broadleaved_deciduous_forest_(>5m)	LC_6
ZAM15	28.3168625	-12.45010778	Zambia	5.94	Acidic	Moderately_acid	66.72	108.96	63.27	4.35	18.55	0.07	0.82	39	40	21	Loam	Medium	0.6775	Humid	4730	19.7	56	2696	45	1270	0	109	_Closed_to_open_(>15%)_shrubland_(<5m)	LC_12
ZAM16	28.73351583	-11.96671611	Zambia	6.2	Acidic	Slightly_acid	36.91	802.91	87.62	12.44	12.63	0.09	1.15	60	16	24	Sandy_clay_loam	Mod_fine	0.5998	Dry_sub_humid	4137	20.9	56	2600	69	1192	0	109	_Open_(15-40%)_broadleaved_deciduous_forest_(>5m)	LC_6
ZAM17	28.75014	-11.51693583	Zambia	6.33	Acidic	Slightly_acid	64.03	451.9	92.12	6.55	65.85	0.08	1.1	72	4	24	Sandy_clay_loam	Mod_fine	0.6527	Humid	4915	19.6	55	2556	59	1223	0	107	_Open_(15-40%)_broadleaved_deciduous_forest_(>5m)	LC_6
ZAM18	28.88337556	-11.1500525	Zambia	7.42	Alkaline	Slightly_alkaline	108.71	1141.62	127.49	10.86	77.05	0.11	1.53	53	20	27	Sandy_clay_loam	Mod_fine	0.6187	Dry_sub_humid	4529	20.2	55	2555	64	1144	0	104	_Mosaic_Vegetation_(grassland,_shrubland,_forest)_(50-70%)_/_Cropland_(20-50%)__	LC_3
ZAM19	29.06693	-10.75003278	Zambia	6.84	Neutral	Neutral	33.14	226.69	40.14	2.97	35.39	0.05	0.93	71	11	18	Sandy_clay_loam	Mod_fine	0.6649	Humid	3490	20.7	57	2197	83	1266	0	102	_Open_(15-40%)_broadleaved_deciduous_forest_(>5m)	LC_6
ZAM2	28.05024222	-14.75024944	Zambia	6.54	Acidic	Slightly_acid	75.9	1410.84	481.3	19.92	5.7	0.11	1.27	56	7	36	Sandy_clay	Fine	0.4296	Semi_arid	5164	20.7	55	2671	81	913	0	117	_Closed_to_open_(>15%)_shrubland_(<5m)	LC_12
ZAM20	29.31672694	-10.38356417	Zambia	6.08	Acidic	Moderately_acid	26.68	203.16	49.13	7.09	7.27	0.06	0.84	70	4	26	Sandy_clay_loam	Mod_fine	0.7167	Humid	4956	20.6	60	1767	95	1357	0	100	_Open_(15-40%)_broadleaved_deciduous_forest_(>5m)	LC_6
ZAM21	29.7002325	-10.26683389	Zambia	5.67	Acidic	Moderately_acid	40.43	228.93	71.46	8.38	19.84	0.11	1.84	66	9	25	Sandy_clay_loam	Mod_fine	0.7568	Humid	5278	20	60	1700	94	1443	0	100	_Open_(15-40%)_broadleaved_deciduous_forest_(>5m)	LC_6
ZAM22	30.1001075	-10.183475	Zambia	5.84	Acidic	Moderately_acid	23.87	203.06	42.73	3.37	32.92	0.06	1.04	80	1	20	Sandy_loam	Mod_coarse	0.732	Humid	4467	20.5	59	1736	99	1420	0	102	_Closed_(>40%)_broadleaved_deciduous_forest_(>5m)	LC_5
ZAM23	30.5168525	-10.23350083	Zambia	5.72	Acidic	Moderately_acid	20.21	275.9	81.97	7.83	36.24	0.08	1.42	70	6	25	Sandy_clay_loam	Mod_fine	0.7276	Humid	4494	20	60	1770	93	1413	0	106	_Open_(15-40%)_broadleaved_deciduous_forest_(>5m)	LC_6
ZAM24	30.91675194	-10.21674611	Zambia	5.93	Acidic	Moderately_acid	55.3	219.96	78.52	4.68	17.05	0.1	1.59	52	27	21	Sandy_clay_loam	Mod_fine	0.6748	Humid	5009	20.7	59	1889	96	1318	0	106	_Open_(15-40%)_broadleaved_deciduous_forest_(>5m)	LC_6
ZAM25	30.16828889	-10.10019972	Zambia	5.25	Acidic	Strongly_acid	14.99	97.3	30	4.5	18.22	0.1	0.81	66	7	27	Sandy_clay_loam	Mod_fine	0.7255	Humid	4629	20.6	60	1717	101	1407	0	102	_Open_(15-40%)_broadleaved_deciduous_forest_(>5m)	LC_6
ZAM26	30.16765278	-9.683602222	Zambia	4.93	Acidic	Very_strongly_acid	27.92	13.4	8.16	3.8	12.04	0.06	0.61	72	0	29	Sandy_clay_loam	Mod_fine	0.6985	Humid	4288	20.5	62	1520	103	1341	0	96	_Closed_to_open_(>15%)_shrubland_(<5m)	LC_12
ZAM27	30.168425	-9.100093333	Zambia	5.98	Acidic	Moderately_acid	57.49	175.82	70.99	5.03	22.49	0.07	1.02	76	0	25	Sandy_clay_loam	Mod_fine	0.6095	Dry_sub_humid	5417	21.9	64	1288	123	1228	0	93	_Closed_(>40%)_broadleaved_deciduous_forest_(>5m)	LC_5
ZAM28	30.3365278	-8.866715556	Zambia	5.42	Acidic	Strongly_acid	74.42	331.14	153.32	10	24.25	0.13	2.08	34	20	46	Clay	Fine	0.5606	Dry_sub_humid	4916	22.9	66	1228	133	1186	0	96	_Closed_to_open_(>15%)_shrubland_(<5m)	LC_12
ZAM3	28.40013944	-14.48340083	Zambia	7.77	Alkaline	Slightly_alkaline	103.85	1026.13	175.19	25.79	28.6	0.06	0.82	55	21	24	Sandy_clay_loam	Mod_fine	0.42	Semi_arid	5208	20.6	54	2684	81	933	0	118	_Closed_to_open_(>15%)_grassland	LC_13
ZAM30	30.50193611	-9.100069167	Zambia	5.93	Acidic	Moderately_acid	44.02	547.36	114.05	5.02	56.63	0.12	1.35	77	7	16	Sandy_clay_loam	Mod_fine	0.6074	Dry_sub_humid	5309	21.5	64	1304	118	1244	0	97	_Open_(15-40%)_broadleaved_deciduous_forest_(>5m)	LC_6
ZAM31	30.83410278	-9.050186667	Zambia	5.99	Acidic	Moderately_acid	55.57	234.74	77.52	5.22	29.9	0.08	0.99	76	8	16	Sandy_clay_loam	Mod_fine	0.5579	Dry_sub_humid	4449	21.8	65	1288	123	1214	0	99	_Open_(15-40%)_broadleaved_deciduous_forest_(>5m)	LC_6
ZAM32	30.16818333	-9.216750556	Zambia	5.93	Acidic	Moderately_acid	105.29	279.75	82.15	229.74	3.98	0.15	1.96	49	26	25	Sandy_clay_loam	Mod_fine	0.6529	Humid	4427	21.1	64	1305	113	1271	0	93	_Open_(15-40%)_broadleaved_deciduous_forest_(>5m)	LC_6
ZAM33	30.66745	-9.016793056	Zambia	6.09	Acidic	Moderately_acid	132.66	314.1	138.68	7.62	7.24	0.09	1.13	55	11	35	Sandy_clay_loam	Mod_fine	0.6135	Dry_sub_humid	4070	20.9	65	1245	115	1248	0	97	_Closed_(>40%)_broadleaved_deciduous_forest_(>5m)	LC_5
ZAM34	30.66874722	-9.350083889	Zambia	7.38	Alkaline	Slightly_alkaline	111.91	1200.56	87.24	9.51	16.91	0.07	0.63	60	13	28	Sandy_clay_loam	Mod_fine	0.6516	Humid	4392	20.6	63	1404	107	1285	0	98	_Closed_to_open_(>15%)_shrubland_(<5m)	LC_12
ZAM35	30.66939722	-9.70001	Zambia	6.08	Acidic	Moderately_acid	36.08	127.16	21.71	2.42	12.02	0.03	0.5	77	2	21	Sandy_clay_loam	Mod_fine	0.7375	Humid	4029	19.3	60	1562	91	1364	0	100	_Open_(15-40%)_broadleaved_deciduous_forest_(>5m)	LC_6
ZAM36	30.66788333	-10.116685	Zambia	6.18	Acidic	Slightly_acid	29.8	192.09	27.5	1.11	39.67	0.04	0.5	83	1	16	Loamy_sand	Coarse	0.6951	Humid	4475	20.8	60	1796	99	1353	0	105	_Closed_to_open_(>15%)_shrubland_(<5m)	LC_12
ZAM37	30.33393611	-10.33361056	Zambia	6.43	Acidic	Slightly_acid	32.07	352.39	64.81	2.13	27.92	0.06	0.77	76	2	22	Sandy_clay_loam	Mod_fine	0.7111	Humid	4486	20.8	60	1810	101	1413	0	107	_Closed_(>40%)_broadleaved_deciduous_forest_(>5m)	LC_5
ZAM38	30.1684	-10.60017917	Zambia	6.5	Acidic	Slightly_acid	53.7	503.14	66.98	1.82	54.83	0.07	0.86	81	3	16	Loamy_sand	Coarse	0.7114	Humid	4873	21.2	58	1905	103	1418	0	107	_Open_(15-40%)_broadleaved_deciduous_forest_(>5m)	LC_6
ZAM39	30.00064722	-10.96692306	Zambia	6.08	Acidic	Moderately_acid	46.22	214.67	42.68	1.69	47.87	0.06	0.68	74	0	26	Sandy_clay_loam	Mod_fine	0.7664	Humid	-203	21.1	57	2069	101	1457	0	109	_Open_(15-40%)_broadleaved_deciduous_forest_(>5m)	LC_6
ZAM4	28.6	-14.11674389	Zambia	6.77	Neutral	Neutral	117.12	354.69	131.5	22.7	53.6	0.07	0.89	73	0	27	Sandy_clay_loam	Mod_fine	0.4744	Semi_arid	4621	20.2	54	2838	72	996	0	118	_Open_(15-40%)_broadleaved_deciduous_forest_(>5m)	LC_6
ZAM40	30.66741944	-11.35002861	Zambia	5.93	Acidic	Moderately_acid	18.55	135.59	56.2	2.06	75.64	0.08	0.94	75	3	22	Sandy_clay_loam	Mod_fine	0.6271	Dry_sub_humid	3857	20.9	57	2159	99	1273	0	113	_Open_(15-40%)_broadleaved_deciduous_forest_(>5m)	LC_6
ZAM41	30.33568056	-11.65025556	Zambia	5.99	Acidic	Moderately_acid	19.09	148.3	47.91	5.31	28.35	0.05	0.68	78	2	20	Sandy_clay_loam	Mod_fine	0.6274	Dry_sub_humid	917	20.8	57	2211	98	1288	0	113	_Closed_to_open_(>15%)_vegetation_(grassland,_shrubland,_woody_vegetation)_on_regularly_flooded_or_waterlogged_soil_-_Fresh,_brackish_or_saline_water	LC_17
ZAM42	30.16932222	-12.03361083	Zambia	5.98	Acidic	Moderately_acid	26.67	230.05	60.2	0.2	17.71	0.06	0.94	72	8	20	Sandy_clay_loam	Mod_fine	0.5765	Dry_sub_humid	445	20.7	57	2320	93	1228	0	114	_Closed_to_open_(>15%)_shrubland_(<5m)	LC_12
ZAM43	30.198611	-12.41677139	Zambia	6.18	Acidic	Slightly_acid	27.61	268.9	86.8	5.05	78.46	0.06	0.9	77	1	22	Sandy_clay_loam	Mod_fine	0.5738	Dry_sub_humid	6497	20.4	56	2422	88	1150	0	116	_Closed_to_open_(>15%)_shrubland_(<5m)	LC_12
ZAM44	30.83441667	-12.80012528	Zambia	6.18	Acidic	Slightly_acid	33.98	195.36	62.48	3.81	22.31	0.07	0.93	67	10	24	Sandy_clay_loam	Mod_fine	0.5922	Dry_sub_humid	5116	18.9	56	2317	81	1054	0	119	_Open_(15-40%)_broadleaved_deciduous_forest_(>5m)	LC_6
ZAM45	30.5006	-13.06675972	Zambia	5.65	Acidic	Moderately_acid	30.06	81.1	35.66	6.6	41.15	0.1	1.24	63	13	24	Sandy_clay_loam	Mod_fine	0.6127	Dry_sub_humid	4125	18.3	57	2297	75	1089	0	119	_Open_(15-40%)_broadleaved_deciduous_forest_(>5m)	LC_6
ZAM46	30.16881389	-13.21684222	Zambia	5.66	Acidic	Moderately_acid	28.19	219.3	82.75	3.73	76.28	0.15	2.12	69	8	23	Sandy_clay_loam	Mod_fine	0.5505	Dry_sub_humid	5082	19.3	57	2427	79	1094	0	118	_Open_(15-40%)_broadleaved_deciduous_forest_(>5m)	LC_6
ZAM47	28.3392222	-13.36667361	Zambia	6.09	Acidic	Moderately_acid	61.72	296.51	99.75	7.84	60.17	0.08	0.98	68	10	22	Sandy_clay_loam	Mod_fine	0.6051	Dry_sub_humid	4774	20.2	55	2659	63	1173	0	112	_Closed_to_open_(>15%)_shrubland_(<5m)	LC_12
ZAM48	28.50135278	-13.60009417	Zambia	5.48	Acidic	Strongly_acid	25.39	408.35	88.86	1.95	36.75	0.15	1.57	75	3	21	Sandy_clay_loam	Mod_fine	0.5658	Dry_sub_humid	5461	19.9	55	2744	65	1110	0	116	_Closed_to_open_(>15%)_shrubland_(<5m)	LC_12
ZAM49	28.00007778	-13.73347056	Zambia	5.76	Acidic	Moderately_acid	28.87	182.52	51.96	2.6	22.27	0.08	0.93	69	11	20	Sandy_clay_loam	Mod_fine	0.542	Dry_sub_humid	4999	20	56	2540	68	1090	0	112	_Closed_(>40%)_broadleaved_deciduous_forest_(>5m)	LC_5
ZAM5	28.50249167	-13.70018472	Zambia	6.42	Acidic	Slightly_acid	78.68	329.88	73.36	13.79	18.94	0.06	0.79	73	7	20	Sandy_clay_loam	Mod_fine	0.5624	Dry_sub_humid	5459	19.6	55	2721	64	1098	0	117	_Closed_to_open_(>15%)_shrubland_(<5m)	LC_12
ZAM50	28.66679444	-13.91672056	Zambia	6.23	Acidic	Slightly_acid	39.79	167.88	50.15	0	42.14	0.05	0.59	83	4	13	Loamy_sand	Coarse	0.5106	Dry_sub_humid	5191	19.8	54	2817	67	1038	0	118	_Closed_to_open_(>15%)_grassland	LC_13
ZAM51	28.335825	-15.36668361	Zambia	7.95	Alkaline	Moderately_alkaline	82.44	8399.48	261.92	27.84	23.61	0.13	1.35	61	18	22	Sandy_clay_loam	Mod_fine	0.4016	Semi_arid	3556	20.4	54	2569	86	836	0	118	_Artificial_surfaces_and_associated_areas_(urban_areas_>50%)_GLOBCOVER_2009	LC_18
ZAM52	28.666975	-15.28345056	Zambia	6.75	Neutral	Neutral	136.57	1011.87	391.62	7.27	8.67	0.13	1.15	61	9	31	Sandy_clay_loam	Mod_fine	0.4029	Semi_arid	4401	21	54	2836	82	817	0	118	_Mosaic_Forest/Shrubland_(50-70%)_/_Grassland_(20-50%)	LC_10
ZAM53	28.16708056	-15.18343417	Zambia	6.73	Neutral	Neutral	27.17	227.5	51.83	0	32.2	0.04	0.39	85	2	14	Loamy_sand	Coarse	0.3915	Semi_arid	4738	21	54	2749	83	851	0	119	_Closed_to_open_(>15%)_shrubland_(<5m)	LC_12
ZAM56	30.33359722	-14.88336583	Zambia	7.24	Neutral	Neutral	178.44	2453.48	499.02	13.35	22.94	0.16	1.93	63	10	27	Sandy_clay_loam	Mod_fine	0.4054	Semi_arid	4878	23.5	53	3069	110	878	0	119	_Mosaic_Vegetation_(grassland,_shrubland,_forest)_(50-70%)_/_Cropland_(20-50%)__	LC_3
ZAM58	30.00144167	-14.4668775	Zambia	6.49	Acidic	Slightly_acid	97.79	1051.78	190.52	23.17	7.16	0.12	1.69	78	3	18	Sandy_clay_loam	Mod_fine	0.3859	Semi_arid	4822	24.4	52	3258	108	870	0	121	_Closed_(>40%)_broadleaved_deciduous_forest_(>5m)	LC_5
ZAM6	28.66689222	-13.26676889	Zambia	5.53	Acidic	Strongly_acid	48.21	336.3	88.19	16.25	14.42	0.14	1.72	77	2	21	Sandy_clay_loam	Mod_fine	0.6096	Dry_sub_humid	5098	19.9	55	2711	63	1183	0	114	_Open_(15-40%)_broadleaved_deciduous_forest_(>5m)	LC_6
ZAM60	30.83341667	-14.18338944	Zambia	7.07	Neutral	Neutral	59.56	861.12	68.68	10.51	79.28	0.04	0.52	87	1	12	Loamy_sand	Coarse	0.4057	Semi_arid	7061	24.1	54	2877	117	883	0	120	_Open_(15-40%)_broadleaved_deciduous_forest_(>5m)	LC_6
ZAM61	30.16792778	-13.93351861	Zambia	6.54	Acidic	Slightly_acid	88.92	518.32	89.22	12.14	33.8	0.04	0.59	78	6	16	Loamy_sand	Coarse	0.484	Semi_arid	4869	21.2	52	3174	83	937	0	119	_Closed_(>40%)_broadleaved_deciduous_forest_(>5m)	LC_5
ZAM62	30.50252778	-13.66678583	Zambia	6.92	Neutral	Neutral	178.69	1549.26	270.94	13.86	43.11	0.15	2.06	66	11	22	Sandy_clay_loam	Mod_fine	0.4363	Semi_arid	4412	22.8	54	2942	100	917	0	119	_Closed_(>40%)_broadleaved_deciduous_forest_(>5m)	LC_5
ZAM63	30.33460278	-13.48346056	Zambia	6.63	Neutral	Neutral	150.67	769.69	216.72	16.11	44.44	0.08	0.8	74	6	20	Sandy_clay_loam	Mod_fine	0.5455	Dry_sub_humid	4572	19.8	55	2717	79	1017	0	119	_Closed_(>40%)_broadleaved_deciduous_forest_(>5m)	LC_5
ZAM64	30.00248333	-13.28352306	Zambia	6.98	Neutral	Neutral	275.89	2373.4	586.08	37.99	99.08	0.11	1.42	57	16	26	Sandy_clay_loam	Mod_fine	0.5658	Dry_sub_humid	5265	18.9	55	2672	70	1082	0	117	_Closed_to_open_(>15%)_shrubland_(<5m)	LC_12
ZAM65	32.7834225	-13.45005972	Zambia	6.71	Neutral	Neutral	91.14	1238.17	161.55	12.67	47.57	0.1	0.99	84	2	14	Loamy_sand	Coarse	0.499	Semi_arid	4577	22.1	57	2293	111	933	0	115	_Closed_to_open_(>15%)_shrubland_(<5m)	LC_12
ZAM66	30.83569444	-13.06693667	Zambia	6.42	Acidic	Slightly_acid	79.53	611.05	264.73	10.81	17.62	0.06	0.71	73	1	26	Sandy_clay_loam	Mod_fine	0.64	Dry_sub_humid	4815	18.1	56	2272	76	1072	0	118	_Open_(15-40%)_broadleaved_deciduous_forest_(>5m)	LC_6
ZAM67	30.83403056	-12.6502	Zambia	6.45	Acidic	Slightly_acid	43.76	864.35	107.83	10.18	24.63	0.08	1.15	82	2	16	Loamy_sand	Coarse	0.5828	Dry_sub_humid	4875	19.2	57	2307	83	1059	0	118	_Open_(15-40%)_broadleaved_deciduous_forest_(>5m)	LC_6
ZAM69	26.00070556	-15.9834225	Zambia	8.29	Alkaline	Moderately_alkaline	179.21	4471.89	368.04	91.69	3.38	0.1	1.01	65	10	24	Sandy_clay_loam	Mod_fine	0.3641	Semi_arid	4203	21	54	3339	53	814	0	119	_Open_(15-40%)_broadleaved_deciduous_forest_(>5m)	LC_6
ZAM7	28.51676194	-13.00024417	Zambia	6.26	Acidic	Slightly_acid	41.89	545.52	68.05	11.37	13.62	0.08	1.29	78	5	17	Sandy_clay_loam	Mod_fine	0.6482	Dry_sub_humid	4949	19.7	55	2621	57	1252	0	111	_Closed_to_open_(>15%)_grassland	LC_13
ZAM71	26.33515833	-16.21693556	Zambia	6.33	Acidic	Slightly_acid	101.54	266.68	151.08	18.93	7.03	0.06	0.71	80	2	18	Sandy_clay_loam	Mod_fine	0.374	Semi_arid	4769	20.7	54	3416	50	829	0	120	_Closed_to_open_(>15%)_shrubland_(<5m)	LC_12
ZAM72	26.33349167	-16.60016306	Zambia	6.52	Acidic	Slightly_acid	93.09	159.36	70.92	16.48	4.02	0.03	0.35	80	4	16	Loamy_sand	Coarse	0.3718	Semi_arid	2890	20	54	3415	45	819	0	117	_Closed_to_open_(>15%)_grassland	LC_13
ZAM73	26.00111389	-16.78357667	Zambia	6.4	Acidic	Slightly_acid	74.51	222.77	42.88	16.22	42.91	0.04	0.41	84	2	14	Loamy_sand	Coarse	0.3594	Semi_arid	3948	20.5	54	3373	51	829	0	116	_Mosaic_Vegetation_(grassland,_shrubland,_forest)_(50-70%)_/_Cropland_(20-50%)__	LC_3
ZAM74	26.50043056	-17.03340333	Zambia	6.16	Acidic	Slightly_acid	96.86	1361.92	277.11	48.02	5.78	0.12	1.31	63	15	23	Sandy_clay_loam	Mod_fine	0.3409	Semi_arid	5945	19.8	54	3328	47	762	0	114	_Mosaic_Vegetation_(grassland,_shrubland,_forest)_(50-70%)_/_Cropland_(20-50%)__	LC_3
ZAM75	26.16747778	-17.2333725	Zambia	6.07	Acidic	Moderately_acid	28.56	317.56	52.31	14.07	14.32	0.05	0.49	88	2	10	Loamy_sand	Coarse	0.3687	Semi_arid	4579	20.3	54	3383	52	841	0	114	_Closed_to_open_(>15%)_shrubland_(<5m)	LC_12
ZAM76	26.83419167	-17.55019194	Zambia	6.25	Acidic	Slightly_acid	26.89	272.46	42.65	14.86	21.38	0.03	0.33	91	1	8	Sand	Coarse	0.3504	Semi_arid	3991	21.1	54	3112	68	772	0	114	_Open_(15-40%)_broadleaved_deciduous_forest_(>5m)	LC_6
ZAM78	26.16825556	-17.76687194	Zambia	6.67	Neutral	Neutral	47.12	394.7	61.75	11.6	26.23	0.06	0.42	91	0	9	Sand	Coarse	0.3041	Semi_arid	3814	22.2	54	3400	71	724	0	115	_Closed_to_open_(>15%)_shrubland_(<5m)	LC_12
ZAM79	26.336075	-15.96681167	Zambia	6.49	Acidic	Slightly_acid	166.56	1205.95	309.93	21.11	10.38	0.09	0.95	70	6	24	Sandy_clay_loam	Mod_fine	0.3686	Semi_arid	3947	20.9	54	3417	51	808	0	120	_Closed_to_open_(>15%)_grassland	LC_13
ZAM8	26.16905833	-12.81693639	Zambia	7.15	Neutral	Neutral	66.7	1499.02	175.21	17.88	57.49	0.12	1.46	74	3	24	Sandy_clay_loam	Mod_fine	0.6082	Dry_sub_humid	4418	19.8	57	2450	55	1213	0	104	_Closed_(>40%)_broadleaved_deciduous_forest_(>5m)	LC_5
ZAM80	26.66674722	-16.03335278	Zambia	8.26	Alkaline	Moderately_alkaline	165.66	6913.18	463.12	33.2	11.77	0.12	1.27	69	15	16	Sandy_loam	Mod_coarse	0.3801	Semi_arid	3794	20.8	54	3400	52	823	0	122	_Closed_to_open_(>15%)_grassland	LC_13
ZAM81	26.6815278	-16.36674417	Zambia	5.55	Acidic	Strongly_acid	95.31	51.6	24.91	10.64	14.96	0.05	0.41	89	1	10	Loamy_sand	Coarse	0.3873	Semi_arid	3533	19.8	54	3375	44	836	0	120	_Mosaic_Vegetation_(grassland,_shrubland,_forest)_(50-70%)_/_Cropland_(20-50%)__	LC_3
ZAM82	26.83442778	-15.36694333	Zambia	7.07	Neutral	Neutral	70.69	1083.34	199.13	18.16	17.64	0.09	0.83	70	12	18	Sandy_loam	Mod_coarse	0.4078	Semi_arid	5922	21.3	55	3155	64	894	0	119	_Open_(15-40%)_broadleaved_deciduous_forest_(>5m)	LC_6
ZAM84	26.00080556	-15.10001139	Zambia	6.8	Neutral	Neutral	167.44	982.53	323.84	21.25	48.51	0.11	1.35	55	16	29	Sandy_clay_loam	Mod_fine	0.4031	Semi_arid	4730	20.7	55	3038	57	897	0	114	_Open_(15-40%)_broadleaved_deciduous_forest_(>5m)	LC_6
ZAM85	26.66713056	-14.9833725	Zambia	6.06	Acidic	Moderately_acid	35.84	451.85	55.67	10.55	19	0.06	0.7	78	9	14	Loamy_sand	Coarse	0.4298	Semi_arid	4193	20.7	55	2939	62	934	0	116	_Open_(15-40%)_broadleaved_deciduous_forest_(>5m)	LC_6
ZAM86	26.16923333	-14.9833425	Zambia	6.7	Neutral	Neutral	112.17	1097.75	165.36	16.01	34	0.13	1.48	68	10	22	Sandy_clay_loam	Mod_fine	0.4224	Semi_arid	4631	20.3	55	3013	55	930	0	113	_Open_(15-40%)_broadleaved_deciduous_forest_(>5m)	LC_6
ZAM87	26.66824444	-14.95023389	Zambia	7.17	Neutral	Neutral	203.59	4548.29	297.7	93.69	29.52	0.14	1.52	58	18	24	Sandy_clay_loam	Mod_fine	0.4349	Semi_arid	4590	20.5	56	2878	62	945	0	115	_Open_(15-40%)_broadleaved_deciduous_forest_(>5m)	LC_6
ZAM88	26.33482778	-14.86693194	Zambia	6.51	Acidic	Slightly_acid	59.5	315.28	59.96	10.65	14.6	0.04	0.53	72	12	16	Loamy_sand	Coarse	0.4251	Semi_arid	4131	20.6	55	2940	61	935	0	114	_Closed_to_open_(>15%)_shrubland_(<5m)	LC_12
ZAM9	27.88341389	-12.55024139	Zambia	5.59	Acidic	Strongly_acid	52.42	260.52	39.86	13.37	45.32	0.1	1.29	68	11	21	Sandy_clay_loam	Mod_fine	0.6825	Humid	4443	19.3	57	2561	43	1289	0	109	_Closed_to_open_(>15%)_grassland	LC_13
ZAM90	27.33608056	-14.91685333	Zambia	5.94	Acidic	Moderately_acid	18.85	202.77	37.56	8.85	30.92	0.06	0.37	91	1	8	Sand	Coarse	0.4392	Semi_arid	4417	20.5	56	2757	71	941	0	116	_Closed_to_open_(>15%)_shrubland_(<5m)	LC_12
ZAM91	27.00173611	-15.0500325	Zambia	5.99	Acidic	Moderately_acid	7.78	160.86	26.74	9.04	13.56	0.02	0.34	93	0	7	Sand	Coarse	0.423	Semi_arid	4776	21	56	2898	68	934	0	117	_Open_(15-40%)_broadleaved_deciduous_forest_(>5m)	LC_6
ZAM93	27.00214722	-15.23354917	Zambia	6.35	Acidic	Slightly_acid	14.69	285.07	36.41	7.87	21.22	0.03	0.23	93	1	6	Sand	Coarse	0.428	Semi_arid	6175	21.2	56	3019	67	933	0	119	_Open_(15-40%)_broadleaved_deciduous_forest_(>5m)	LC_6
ZAM94	27.16868611	-15.63334528	Zambia	6.25	Acidic	Slightly_acid	10.59	865.31	106.15	8.77	5.87	0.08	1.53	91	1	8	Sand	Coarse	0.3932	Semi_arid	4747	21.4	55	3170	65	849	0	122	_Open_(15-40%)_broadleaved_deciduous_forest_(>5m)	LC_6
ZAM95	27.16696944	-16.05002194	Zambia	6.25	Acidic	Slightly_acid	14.09	271.57	24.17	7.64	25.02	0.02	0.25	94	0	6	Sand	Coarse	0.3726	Semi_arid	4362	21.1	55	3273	60	824	0	121	_Mosaic_Forest/Shrubland_(50-70%)_/_Grassland_(20-50%)	LC_10
ZAM96	27.333725	-16.43337056	Zambia	6.92	Neutral	Neutral	27.56	1395.3	189.96	13.39	19.66	0.08	1.42	92	1	7	Sand	Coarse	0.3993	Semi_arid	4036	20.1	55	3223	53	844	0	118	_Closed_to_open_(>15%)_shrubland_(<5m)	LC_12
ZAM97	27.66926389	-16.75014944	Zambia	6.5	Acidic	Slightly_acid	12.8	539.54	90.15	12.43	15.31	0.07	0.58	94	0	6	Sand	Coarse	0.3665	Semi_arid	3848	22.5	55	2922	85	818	0	116	_Closed_(>40%)_broadleaved_deciduous_forest_(>5m)	LC_5
ZAM98	27.00004444	-17.05027028	Zambia	6.92	Neutral	Neutral	53.72	953.33	96.43	16.05	53.7	0.08	0.55	92	1	7	Sand	Coarse	0.3846	Semi_arid	4513	19.4	55	3243	46	806	0	113	_Closed_to_open_(>15%)_grassland	LC_13
ZAM99	27.16835278	-17.43341417	Zambia	6.43	Acidic	Slightly_acid	35.4	417.51	58.4	10.13	19.13	0.05	0.46	94	0	6	Sand	Coarse	0.3214	Semi_arid	4696	24	55	2887	102	787	0	116	_Closed_(>40%)_broadleaved_deciduous_forest_(>5m)	LC_5
BIN1	27.66685139	-18.28354222	Zimbabwe	7.21	Neutral	Neutral	68.29	1319.81	96.5	18.35	22.65	0.06	0.67	82	2	16	Loamy_sand	Coarse	0.2937	Semi_arid	4142	21.5	55	3120	73	665	0	113	_Closed_to_open_(>15%)_grassland	LC_13
BIN3	28.10007111	-17.56692444	Zimbabwe	6.49	Acidic	Slightly_acid	73.21	470.32	68.7	13.42	8.44	0.04	0.39	77	7	16	Loamy_sand	Coarse	0.3482	Semi_arid	4910	21.5	54	2803	88	739	0	115	_Closed_to_open_(>15%)_shrubland_(<5m)	LC_12
BMA1	29.050115	-20.43356639	Zimbabwe	6.32	Acidic	Slightly_acid	97.58	751.25	139.63	15.54	8.75	0.16	1.23	77	7	16	Loamy_sand	Coarse	0.2855	Semi_arid	3452	19.5	57	3394	48	579	1	96	_Closed_to_open_(>15%)_shrubland_(<5m)	LC_12
BMA2	29.53340389	-20.46688639	Zimbabwe	5.98	Acidic	Moderately_acid	42.16	287.49	77.9	11.73	2.04	0.04	0.44	80	8	12	Loamy_sand	Coarse	0.2887	Semi_arid	3458	19.1	56	3416	51	584	1	96	_Closed_to_open_(>15%)_shrubland_(<5m)	LC_12
BMA3	30.00008139	-20.31674583	Zimbabwe	6.42	Acidic	Slightly_acid	100.88	507.1	485.4	81.08	1.79	0.09	0.74	69	13	18	Sandy_loam	Mod_coarse	0.2714	Semi_arid	3556	20.2	57	3233	66	561	2	94	_Open_(15-40%)_broadleaved_deciduous_forest_(>5m)	LC_6
GK1	30.63333778	-17.56675694	Zimbabwe	6	Acidic	Slightly_acid	103.34	996.53	537.69	20.17	1.18	0.17	1.81	46	13	41	Sandy_clay	Fine	0.4253	Semi_arid	4502	17.7	58	2826	47	826	0	107	_Mosaic_Vegetation_(grassland,_shrubland,_forest)_(50-70%)_/_Cropland_(20-50%)__	LC_3
GK2	30.11676472	-17.35000694	Zimbabwe	6.25	Acidic	Slightly_acid	112.86	763.39	202.49	19.35	18.19	0.13	1.28	24	32	44	Clay	Fine	0.4207	Semi_arid	4334	18.9	57	2764	60	822	1	108	_Closed_to_open_(>15%)_shrubland_(<5m)	LC_12
GK3	29.81675778	-16.98345417	Zimbabwe	6.18	Acidic	Slightly_acid	50.51	500.76	181.07	16.57	2.09	0.08	0.7	44	36	20	Loam	Medium	0.401	Semi_arid	5050	19.3	55	2889	67	806	0	112	_Closed_to_open_(>15%)_shrubland_(<5m)	LC_12
HVF10	28.03355722	-19.21675944	Zimbabwe	6.11	Acidic	Slightly_acid	17.64	160.48	30.86	8.52	28.39	-0.04	0.33	90	1	9	Sand	Coarse	0.2625	Semi_arid	3735	20.9	57	3622	46	581	0	107	_Mosaic_Vegetation_(grassland,_shrubland,_forest)_(50-70%)_/_Cropland_(20-50%)__	LC_3
HVF11	27.58355833	-18.81671111	Zimbabwe	5.9	Acidic	Moderately_acid	6.88	190.04	21.47	5.75	17.66	0.03	0.39	93	1	6	Sand	Coarse	0.2724	Semi_arid	3866	21.4	56	3520	48	621	0	109	_Open_(15-40%)_broadleaved_deciduous_forest_(>5m)	LC_6
HVF14	26.03341667	-18.21693583	Zimbabwe	6.93	Neutral	Neutral	201.49	2977.34	806.56	29.68	45.59	0.13	1.18	59	19	22	Sandy_clay_loam	Mod_fine	0.2571	Semi_arid	3267	22.7	54	3412	75	642	0	115	_Mosaic_Grassland_(50-70%)_/_Forest/Shrubland_(20-50%)	LC_11
HVF2	30.18348222	-18.11677028	Zimbabwe	6.49	Acidic	Slightly_acid	44.21	900.63	164.37	14.41	8.59	0.08	0.98	80	4	16	Loamy_sand	Coarse	0.3682	Semi_arid	4507	19.7	57	2934	59	753	0	108	_Open_(15-40%)_broadleaved_deciduous_forest_(>5m)	LC_6
HVF3	29.83333472	-18.40012583	Zimbabwe	5.9	Acidic	Moderately_acid	103.46	2624.59	909.96	26.18	2.74	0.2	1.69	31	28	41	Clay	Fine	0.3293	Semi_arid	4237	20.3	58	2922	69	740	0	108	_Mosaic_Vegetation_(grassland,_shrubland,_forest)_(50-70%)_/_Cropland_(20-50%)__	LC_3
HVF4	29.80000583	-18.85006306	Zimbabwe	6.16	Acidic	Slightly_acid	91.13	349.85	445.23	14.34	4.23	0.1	1.08	58	20	22	Sandy_clay_loam	Mod_fine	0.3058	Semi_arid	3316	19.6	57	2995	57	687	0	106	_Open_(15-40%)_broadleaved_deciduous_forest_(>5m)	LC_6
HVF5	29.78341083	-19.28360361	Zimbabwe	6.25	Acidic	Slightly_acid	137.38	2155.45	841.59	23.05	1.64	0.11	1.1	44	26	30	Clay_loam	Mod_fine	0.3216	Semi_arid	3696	18.4	56	3051	54	650	0	103	_Open_(15-40%)_broadleaved_deciduous_forest_(>5m)	LC_6
HVF6	29.58349778	-19.68338389	Zimbabwe	6.73	Neutral	Neutral	37.86	499.04	106.58	71.23	2.22	0.04	0.53	76	4	20	Sandy_clay_loam	Mod_fine	0.3292	Semi_arid	4030	18.1	56	3156	52	666	1	103	_Closed_to_open_(>15%)_shrubland_(<5m)	LC_12
HVF7	29.15003	-19.78360444	Zimbabwe	6.07	Acidic	Moderately_acid	60.03	762.61	241.25	19.12	4.95	0.08	0.99	73	11	16	Loamy_sand	Coarse	0.3101	Semi_arid	3349	18	57	3180	48	647	0	103	_Closed_to_open_(>15%)_shrubland_(<5m)	LC_12
HVF8	28.76671583	-20.0668175	Zimbabwe	6.49	Acidic	Slightly_acid	143.95	3880.82	959.84	79.18	11.98	0.26	2.23	35	32	33	Clay_loam	Mod_fine	0.2906	Semi_arid	3185	18.7	57	3114	57	640	0	100	_Closed_to_open_(>15%)_shrubland_(<5m)	LC_12
HVF9	28.35015667	-19.58353167	Zimbabwe	8.1	Alkaline	Moderately_alkaline	147.66	1910.5	887.82	160.78	6.32	0.06	0.53	70	5	24	Sandy_clay_loam	Mod_fine	0.267	Semi_arid	5092	19.7	58	3255	54	589	0	103	_Closed_to_open_(>15%)_shrubland_(<5m)	LC_12
MTK1	31.05004944	-17.38343083	Zimbabwe	5.35	Acidic	Strongly_acid	12.71	75.98	12.69	15.08	4.11	0.06	0.49	85	3	12	Loamy_sand	Coarse	0.4632	Semi_arid	5280	17.9	59	3153	41	867	1	109	_Mosaic_Vegetation_(grassland,_shrubland,_forest)_(50-70%)_/_Cropland_(20-50%)__	LC_3
MTK4	32.80007444	-16.95026278	Zimbabwe	6.75	Neutral	Neutral	168.4	1471.2	361.62	21.68	17.27	0.12	1.13	79	3	18	Sandy_clay_loam	Mod_fine	0.3476	Semi_arid	4275	21.9	60	2713	100	631	0	120	_Closed_to_open_(>15%)_grassland	LC_13
MTR1	31.38347806	-19.96691278	Zimbabwe	5.93	Acidic	Moderately_acid	104.85	2170.64	547.97	23.07	6.43	0.06	1.65	34	31	35	Clay_loam	Mod_fine	0.3728	Semi_arid	3995	18.6	56	3022	64	723	4	98	_Open_(15-40%)_broadleaved_deciduous_forest_(>5m)	LC_6
MTR2	31.91685583	-19.96688361	Zimbabwe	6.7	Neutral	Neutral	82.55	1045.83	96.28	25.91	7.31	0.03	0.32	72	9	18	Sandy_clay_loam	Mod_fine	0.3166	Semi_arid	3065	20.3	58	3056	73	617	2	99	_Closed_to_open_(>15%)_grassland	LC_13
MTR5	32.60018861	-18.91692833	Zimbabwe	6.77	Neutral	Neutral	34.47	4362.02	990.99	29.34	0	0.08	0.59	49	21	30	Sandy_clay_loam	Mod_fine	0.4518	Semi_arid	4890	18.9	57	2967	71	770	6	96	_Open_(15-40%)_broadleaved_deciduous_forest_(>5m)	LC_6
NHR1	32.20024306	-18.53346556	Zimbabwe	5.73	Acidic	Moderately_acid	54.79	372.24	69.63	11.1	13.06	0	0.59	75	3	22	Sandy_clay_loam	Mod_fine	0.4909	Semi_arid	3375	16.2	57	2825	47	810	4	96	_Closed_to_open_(>15%)_shrubland_(<5m)	LC_12
NHR2	31.93345444	-18.16670556	Zimbabwe	5.7	Acidic	Moderately_acid	30.61	91.05	38.89	11.18	4.93	0.06	0.42	83	1	16	Loamy_sand	Coarse	0.4667	Semi_arid	4147	16.9	57	2679	53	835	2	99	_Closed_to_open_(>15%)_shrubland_(<5m)	LC_12
NHR3	31.45013	-18.13357972	Zimbabwe	5.9	Acidic	Moderately_acid	36.28	142.32	62.13	10.85	6.6	0.04	0.39	79	4	18	Sandy_clay_loam	Mod_fine	0.4782	Semi_arid	3955	17.2	57	2730	53	883	1	100	_Closed_to_open_(>15%)_shrubland_(<5m)	LC_12
RUS2	31.38355833	-17.13346806	Zimbabwe	6.36	Acidic	Slightly_acid	55.4	566.78	123.31	16.44	11.17	0.06	0.82	76	8	16	Loamy_sand	Coarse	0.4836	Semi_arid	4151	17.9	57	3293	39	837	0	113	_Open_(15-40%)_broadleaved_deciduous_forest_(>5m)	LC_6
