# Supplementary material for: Biogeographical survey of soil microbiomes across sub-Saharan Africa: structure, drivers, and predicted climate-driven changes
Source: Microbiome. 2022 Aug 23;10:131. doi: 10.1186/s40168-022-01297-w (PMC9396824; doi:10.1186/s40168-022-01297-w)
Supplement: Supplementary file 16 — Additional file 15. Table S4. Table with the semi-partial correlation analysis results, in which the correlation values (r) and associated p-values of the variable with the highest correlative value are displayed for each dominant phylotype that was significantly (p-value < 0.05) correlated with environmental factors. [file 40168_2022_1297_MOESM15_ESM.csv]

ASV id	Variable	Correlation �	p-value	Domain	Phylum	Class	Order	Family	Genus
054ee5339e518c6e92646d6746e03e3e	Bio15	0.123484947	0.000508193	Bacteria	Proteobacteria	Alphaproteobacteria	Rhizobiales	Beijerinckiaceae
5a45e59f455d19cbfbdd777f714477a8	Bio15	-0.104437364	0.003	Bacteria	Proteobacteria	Alphaproteobacteria	Rhizobiales	Hyphomicrobiaceae	Pedomicrobium
7caa3bc97c661864d56070a8223a8ed2	Bio15	-0.076267979	0.032191365	Bacteria	Acidobacteriota	Subgroup_5	Subgroup_5	Subgroup_5	Subgroup_5
a3a3b09aa72b20a833e263c013b706ad	Bo3	0.089923502	0.011504457	Bacteria	Chloroflexi	TK10	TK10	TK10	TK10
ff554f573205cf0a32c5bc4098dcb22d	Bo3	-0.090789038	0.010728679	Bacteria	Proteobacteria	Gammaproteobacteria	Burkholderiales	Comamonadaceae
4ffd115e21ec055f448e0f31c88bfb55	Ca	0.078562152	2.70E-01	Bacteria	Bacteroidota	Bacteroidia	Chitinophagales	Chitinophagaceae	Terrimonas
57fdb6dcbb12eeb6b814d55283216db3	Ca	0.090626086	0.01	Bacteria	Proteobacteria	Alphaproteobacteria	Dongiales	Dongiaceae	Dongia
981c247fdbd8216d86aedb6bedfad1fa	Ca	-0.079706181	2.50E-02	Bacteria	Actinobacteriota	Actinobacteria	Frankiales	uncultured	uncultured
e2c38795eaf8222ff24d73caa0713a18	Ca	-0.080944528	2.30E-02	Bacteria	Gemmatimonadota	Gemmatimonadetes	Gemmatimonadales	Gemmatimonadaceae	Gemmatimonas
700b46be5ec2cc0235b1b1027de4ead5	K	0.083877701	0.018449503	Bacteria	Firmicutes	Bacilli	Bacillales	Bacillaceae	Bacillus
03b6833f2ec792d974f49dd3748f5ca0	Clay_Percent	0.080762118	2.30E-02	Bacteria	Actinobacteriota	Thermoleophilia	Gaiellales
166f6b04b8ba3e442e38a0a9c8a86a96	Clay_Percent	0.10549124	0.003009731	Bacteria	Actinobacteriota	Thermoleophilia	Gaiellales	uncultured	uncultured
49ab021b271ebeac350faccd323f4d7a	Clay_Percent	0.108970312	0.002175522	Bacteria	Planctomycetota	Planctomycetes	Gemmatales	Gemmataceae	uncultured
d6d45710afa2da7372c1254904463388	Clay_Percent	0.074762465	0.035	Bacteria	Actinobacteriota	Thermoleophilia	Gaiellales	Gaiellaceae	Gaiella
f9868e1beaa34c35bc1844b9546348ef	Clay_Percent	0.115171242	0.001192273	Bacteria	Planctomycetota	Planctomycetes	Gemmatales	Gemmataceae	uncultured
fb19a9b2183a6421001f76760f36b209	Clay_Percent	0.081907852	0.021394968	Bacteria	Acidobacteriota	Vicinamibacteria	Vicinamibacterales	uncultured	uncultured
76eab29d760f9163c81c318fd2ed67eb	Longitude	0.077	0.02	Archaea	Crenarchaeota	Nitrososphaeria	Nitrososphaerales	Nitrososphaeraceae	Nitrososphaeraceae
d7fdf4add1b0d9ae9434e81e726b96a2	Longitude	0.13	0.000142321	Archaea	Crenarchaeota	Nitrososphaeria	Nitrososphaerales	Nitrososphaeraceae	Nitrososphaeraceae
bd5d8ba85e38bbec6f023387e260d3f4	Longitude	-0.159	7.29454E-06	Fungi	Ascomycota	Dothideomycetes	Pleosporales	Didymellaceae	Didymella
583018df90fbeef07a88daa04b7a7be4	Longitude	0.18	1.87652E-07	Fungi	Glomeromycota	Glomeromycetes	Glomerales	Glomeraceae	Unknown
0951d45eaad2aea13277b548c0650783	Longitude	0.072866741	0.040732764	Bacteria	Proteobacteria	Gammaproteobacteria	Burkholderiales	Comamonadaceae	Ramlibacter
1d17b00044b55b28ea859344fd8a138c	Longitude	0.106907774	0.002640065	Bacteria	Actinobacteriota	Rubrobacteria	Rubrobacterales	Rubrobacteriaceae	Rubrobacter
1d75ea9edb09455b942c222362724ecd	Longitude	0.11081266	0.001825138	Bacteria	Bacteroidota	Bacteroidia	Chitinophagales	Chitinophagaceae	Niastella
1fd21a4a59bd14e85822f31096539e36	Longitude	0.148353449	0.0000287	Bacteria	Actinobacteriota	Actinobacteria	Micrococcales	Micrococcaceae
245017f52358dfc1131add20e58c2c41	Longitude	0.114203395	0.001312154	Bacteria	Chloroflexi	Chloroflexia	Chloroflexales	Roseiflexaceae	uncultured
3b4cb08ccbe40032eda9a173103c984d	Longitude	0.113859379	0.001357373	Bacteria	Proteobacteria	Alphaproteobacteria	Rhizobiales	Xanthobacteraceae
52a19413bd8ab0bf6df5dae7608f7ddd	Longitude	0.202486971	9.57E-09	Bacteria	Proteobacteria	Gammaproteobacteria	Gammaproteobacteria_Incertae_Sedis	Unknown_Family	Acidibacter
52bd70fce84629a9f2166c2627594c5b	Longitude	-0.078100274	0.028261071	Bacteria	Chloroflexi	Ktedonobacteria	C0119	C0119	C0119
5fe17e7f013a0b3170e677f9d8c9a23b	Longitude	0.111106504	0.001774302	Bacteria	Actinobacteriota	Actinobacteria	Micromonosporales	Micromonosporaceae
784d6e59b8d99a185d78a0c5f56c030d	Longitude	0.110669275	0.001850427	Bacteria	Acidobacteriota	Blastocatellia	11-24	11-24	11-24
7d3426f862bd29b110bc0fd337ef4e47	Longitude	-0.169809174	0.00000161	Bacteria	Proteobacteria	Alphaproteobacteria	Rhodobacterales	Rhodobacteraceae	Rubellimicrobium
861a2f31d67b2794f163e160b7b59e99	Longitude	-0.125190029	0.000423833	Bacteria	Actinobacteriota	Thermoleophilia	Gaiellales	uncultured	uncultured
c4da77b8f3dc9ccff18cb2299a8a1570	Longitude	0.103369545	0.003652066	Bacteria	Proteobacteria	Alphaproteobacteria	Rhizobiales	Xanthobacteraceae	Rhodoplanes
c94471504699357de6994229fd80898a	Longitude	0.210330348	2.44E-09	Bacteria	Actinobacteriota	Actinobacteria	Pseudonocardiales	Pseudonocardiaceae	Crossiella
d3ee28f038a51c4981b09e5df45c9451	Longitude	-0.156523312	0.00001	Bacteria	Proteobacteria	Alphaproteobacteria	Acetobacterales	Acetobacteraceae	Craurococcus-Caldovatus
f36f6f3a45a0dc50faa551dc6bbce15f	Longitude	0.093473693	0.008609395	Bacteria	Actinobacteriota	Actinobacteria	Micromonosporales	Micromonosporaceae	Actinoplanes
f37b5e1f30777f6618430134f431a487	Longitude	0.151635066	0.0000189	Bacteria	Actinobacteriota	Actinobacteria	Corynebacteriales	Mycobacteriaceae	Mycobacterium
971183ffc73c7d11eb37996f561dcb99	Mg	0.083	1.80E-02	Bacteria	Actinobacteriota	Actinobacteria	Propionibacteriales	Nocardioidaceae	Nocardioides
0b3dd1ebf0a677191c6d807d8af43f1f	Na	-0.103631971	0.00356638	Bacteria	Gemmatimonadota	Gemmatimonadetes	Gemmatimonadales	Gemmatimonadaceae
2eecf65e760eb8a617d9b42c05007113	Na	-0.073603399	0.038735773	Bacteria	Actinobacteriota	Acidimicrobiia	IMCC26256	IMCC26256	IMCC26256
366519b200bc240b4473386624636718	Na	-0.114545565	0.001268557	Bacteria	Acidobacteriota	Blastocatellia	Pyrinomonadales	Pyrinomonadaceae	RB41
58b84266f85fe9612d7a1150f94ae548	Na	-0.105495463	0.003008562	Bacteria	Proteobacteria	Alphaproteobacteria	Acetobacterales	Acetobacteraceae	uncultured
8a46c822bfb5310f680c52ab52655a53	Na	-0.126273814	0.000377202	Bacteria	Proteobacteria	Gammaproteobacteria	Burkholderiales	Oxalobacteraceae	Noviherbaspirillum
91a555bb8c3557cae5db30e16d75d02f	Na	-0.155346603	1.17E-05	Bacteria	Gemmatimonadota	Gemmatimonadetes	Gemmatimonadales	Gemmatimonadaceae	Roseisolibacter
9baf3fe2b809420c8a0bf517138fd6e4	Na	-0.081247696	0.022469619	Bacteria	Proteobacteria	Gammaproteobacteria	Burkholderiales	Nitrosomonadaceae	Ellin6067
a620237c4600841bfb6a5782f3812071	Na	-0.084460363	0.017649087	Bacteria	Chloroflexi	TK10	TK10	TK10	TK10
b1b5483fb76b86762fa5f25f7111e0be	Na	-0.139607096	8.34E-05	Bacteria	Proteobacteria	Alphaproteobacteria	Rhizobiales	Beijerinckiaceae	Psychroglaciecola
b81851e9fc2f37fa9e1ca3abc6ad710c	Na	-0.088008287	0.013399988	Bacteria	Gemmatimonadota	Gemmatimonadetes	Gemmatimonadales	Gemmatimonadaceae	uncultured
b9f882db8eba8df788de14ca530637ca	Na	-0.120211257	0.000715539	Bacteria	Gemmatimonadota	Gemmatimonadetes	Gemmatimonadales	Gemmatimonadaceae	Roseisolibacter
e4ede17a912aa670374c7b1f06e75bc8	Na	-0.079965219	0.024691759	Bacteria	Actinobacteriota	Thermoleophilia	Solirubrobacterales	Solirubrobacteraceae	Solirubrobacter
743ef91b0ca98c4a5cec62a5529e54cb	P	0.096	0.006	Archaea	Crenarchaeota	Nitrososphaeria	Nitrososphaerales	Nitrososphaeraceae	Candidatus_Nitrocosmicus
743adfe5d871c4ea671b6b831eba75d4	P	0.16	8.10171E-06	Archaea	Crenarchaeota	Nitrososphaeria	Nitrososphaerales	Nitrososphaeraceae	Candidatus_Nitrocosmicus
1d7a83da662b7c60577c3cdf63a3ea24	P	125	0.000419911	Fungi	Ascomycota	Eurotiomycetes	Eurotiales	Aspergillaceae	Penicillium
1370dd4137a5051ce7f1cff8e3aed158	P	0.107119979	0.002588402	Bacteria	Bacteroidota	Bacteroidia	Chitinophagales	Chitinophagaceae	Segetibacter
1ef6f80bacbfd8a73b56f20063e7ed95	P	-0.108791477	0.00221262	Bacteria	Entotheonellaeota	Entotheonellia	Entotheonellales	Entotheonellaceae	Entotheonellaceae
2f9c27c130e703e64408b684a7e2a829	P	0.142177139	6.13E-05	Bacteria	Actinobacteriota	Actinobacteria	Pseudonocardiales	Pseudonocardiaceae	Pseudonocardia
36b21509e5422acc3831cf04e65e3c4f	P	0.184800836	1.72E-07	Bacteria	Actinobacteriota	Actinobacteria	Frankiales	Geodermatophilaceae	Geodermatophilus
3afd3a325171916f2968c274127659ae	P	0.077388412	0.02973607	Bacteria	Bacteroidota	Bacteroidia	Chitinophagales	Chitinophagaceae	Chitinophagaceae
3f53afd7a44890039293b91e5ed69f8c	P	0.098232304	0.00575245	Bacteria	Bacteroidota	Bacteroidia	Chitinophagales	Chitinophagaceae
463f0cf6eb57c4e0e861256eb15a4bd2	P	0.151842577	1.84E-05	Bacteria	Actinobacteriota	Actinobacteria	Frankiales	Geodermatophilaceae	Modestobacter
4eb89b18594ee7121356ec4381560d3e	P	-0.158573091	7.62E-06	Bacteria	Actinobacteriota	Rubrobacteria	Rubrobacterales	Rubrobacteriaceae	Rubrobacter
5914e0393a8d7f232b88c2c2659bca3f	P	0.172938491	1.02E-06	Bacteria	Actinobacteriota	Actinobacteria	Frankiales	Geodermatophilaceae
5ec1ccbb38aae37b3002b1f91ed3d0d8	P	-0.106447539	0.002755359	Bacteria	Acidobacteriota	Vicinamibacteria	Vicinamibacterales	uncultured	uncultured
67c163ebb7008b75a6af47feaba4c258	P	0.190373959	7.11E-08	Bacteria	Actinobacteriota	Actinobacteria	Frankiales	Geodermatophilaceae	Blastococcus
68e9bfd05bff4f8d62cfa607de072677	P	0.099656286	0.005081851	Bacteria	Actinobacteriota	Actinobacteria	Micrococcales	Microbacteriaceae
726f1c5c45c2c76c5ffd0983d9c052e3	P	0.124249926	0.000468578	Bacteria	Actinobacteriota	Actinobacteria	Kineosporiales	Kineosporiaceae	Angustibacter
822c9a0807dfb3c3c809635ade2bcf79	P	0.146797977	3.48E-05	Bacteria	Actinobacteriota	Actinobacteria	Streptomycetales	Streptomycetaceae	Streptomyces
8ac13b3e0ef7f44c2d08e456571179c2	P	-0.112399683	0.001565653	Bacteria	Verrucomicrobiota	Verrucomicrobiae	Chthoniobacterales	Chthoniobacteraceae	Candidatus_Udaeobacter
98df017e7f986c8c195b6f243571dfaa	P	0.138400775	9.61E-05	Bacteria	Firmicutes	Bacilli	Paenibacillales	Paenibacillaceae	Ammoniphilus
a5e91feffeb2606cb6226e5956ced57e	P	-0.135274884	0.000138259	Bacteria	Methylomirabilota	Methylomirabilia	Rokubacteriales	Rokubacteriales	Rokubacteriales
ad02fab1dba5c9ba0dbd91387906f628	P	0.10062908	0.004665172	Bacteria	Chloroflexi	Ktedonobacteria	C0119	C0119	C0119
ad968b942c35d31de767c33964e20256	P	0.086988827	0.014517282	Bacteria	Planctomycetota	Phycisphaerae	Tepidisphaerales	WD2101_soil_group	WD2101_soil_group
c00a3c445563c821c6b92cd5d0ce5554	P	0.148009224	2.99E-05	Bacteria	Bacteroidota	Bacteroidia	Chitinophagales	Chitinophagaceae	Flavisolibacter
d138409decd3461ab4b4962facb79e05	P	-0.091746966	0.009924527	Bacteria	Proteobacteria	Alphaproteobacteria	Sphingomonadales	Sphingomonadaceae	Sphingomonas
e477d66c3effe58fe5065fe3b00c62f5	P	0.122999033	0.000534952	Bacteria	Bacteroidota	Bacteroidia	Chitinophagales	Chitinophagaceae	Segetibacter
e96b432151f77a032766d241dd242936	P	-0.128746952	0.000288115	Bacteria	Actinobacteriota	Actinobacteria	Frankiales	Frankiaceae	Jatrophihabitans
ea21d7ab25a5639c2015b02c8bcbcb19	P	-0.09987239	0.004986488	Bacteria	Planctomycetota	Planctomycetes	Pirellulales	Pirellulaceae	Pirellula
eda3fb5307f2ebc347491e4779f41030	P	-0.156799313	9.65E-06	Bacteria	Myxococcota	bacteriap25	bacteriap25	bacteriap25	bacteriap25
ef83b54026ca21bbcf530de56d4f4f5e	P	0.10784463	0.002418859	Bacteria	Planctomycetota	Phycisphaerae	Tepidisphaerales	WD2101_soil_group	WD2101_soil_group
effb6651fe81a97938c93a3f64c4b5ae	P	-0.151381483	1.95E-05	Bacteria	Acidobacteriota	Holophagae	Subgroup_7	Subgroup_7	Subgroup_7
f67c8486d517c06c7b6bcbedff68e6ed	P	0.089489829	0.011911529	Bacteria	Bacteroidota	Bacteroidia	Chitinophagales	Chitinophagaceae	Flaviaesturariibacter
4541adaa5600dc916be6b936932afa90	pH	0.21	4.6083E-10	Archaea	Crenarchaeota	Nitrososphaeria	Nitrososphaerales	Nitrososphaeraceae	Candidatus_Nitrososphaera
89983221462a2f36e5433309c7f9f2f5	pH	-0.08	0.02	Archaea	Crenarchaeota	Nitrososphaeria	Nitrososphaerales	Nitrososphaeraceae
1e3c43bef9bb6974e7dbd9a5e6ce1e6f	pH	0.2	8.07783E-09	Archaea	Crenarchaeota	Nitrososphaeria	Nitrososphaerales	Nitrososphaeraceae	Candidatus_Nitrososphaera
65a867248c9c11c7debe4efb0d195a94	pH	0.88	0.012594126	Fungi	Unknown	Unknown	Unknown	Unknown	Unknown
9bd737d6d9f338eaef6483766e9ecd24	pH	0.08	0.018	Fungi	Basidiomycota	Tremellomycetes	Tremellales	Trimorphomycetaceae	Saitozyma
0162a6f2d8016b02619672ef83782df1	pH	0.116503398	0.001043742	Bacteria	Proteobacteria	Alphaproteobacteria	Sphingomonadales	Sphingomonadaceae
0291e3d64da56a3fbc8acbfb60eba8e6	pH	-0.201417492	1.15E-08	Bacteria	Acidobacteriota	Acidobacteriae	Bryobacterales	Bryobacteraceae	Bryobacter
02fab7f8f72bd3fdccace7bacbea3f7a	pH	-0.076077988	0.032624454	Bacteria	Acidobacteriota	Vicinamibacteria	Vicinamibacterales	uncultured	uncultured
0b5970323a48d2d33b17e2327ce4096f	pH	0.203170801	8.51E-09	Bacteria	Actinobacteriota	Thermoleophilia	Solirubrobacterales	Solirubrobacteraceae	Parviterribacter
0d7f1d6b5cad9fd21353d8e17b661209	pH	-0.082776324	0.02004943	Bacteria	Planctomycetota	Planctomycetes	Isosphaerales	Isosphaeraceae
0dba5b792cdb22b80b969b29f9b8d890	pH	-0.118831638	0.000824477	Bacteria	Proteobacteria	Gammaproteobacteria	Burkholderiales	SC-I-84	SC-I-84
0fd5a3c3319b5060dc54e6e923078898	pH	-0.254508598	3.95E-13	Bacteria	Actinobacteriota	Actinobacteria	Frankiales	Frankiaceae	Jatrophihabitans
1476593794981bfe989d9af8093606ee	pH	0.101755925	0.004221276	Bacteria	Actinobacteriota	Acidimicrobiia	uncultured	uncultured	uncultured
162fb852385f78e997eae494c1116690	pH	0.212476549	1.66E-09	Bacteria	Actinobacteriota	Rubrobacteria	Rubrobacterales	Rubrobacteriaceae	Rubrobacter
18c4889d8c30b4c33a9d39ac4b928b27	pH	-0.11114358	0.001767981	Bacteria	Proteobacteria	Alphaproteobacteria	Rhizobiales	Xanthobacteraceae	uncultured
1c6b4256b9cac22c5d8cd734d3784096	pH	0.148146685	2.94E-05	Bacteria	Proteobacteria	Gammaproteobacteria	Steroidobacterales	Steroidobacteraceae	Steroidobacter
1da6114169ffeee42235ae1bb80604b6	pH	0.149829914	2.38E-05	Bacteria	Acidobacteriota	Blastocatellia	11-24	11-24	11-24
25a403543f9c2999f7ee55a9ae6f892d	pH	-0.125811718	0.000396466	Bacteria	Bacteroidota	Bacteroidia	Chitinophagales	Chitinophagaceae	uncultured
2745092fe6ddc6ffdc847f3fb9c0e656	pH	0.213523314	1.38E-09	Bacteria	Proteobacteria	Gammaproteobacteria	Burkholderiales	TRA3-20	TRA3-20
2778146ee39a4826b03c7ca7c37c8eb3	pH	0.195902568	2.89E-08	Bacteria	Armatimonadota	uncultured	uncultured	uncultured	uncultured
298932288b7e67ef7407b1888446e6fc	pH	-0.180343723	3.40E-07	Bacteria	Actinobacteriota	Thermoleophilia	Gaiellales	uncultured	uncultured
2ba2194245c6314a6751aca47837e7a7	pH	-0.184508647	1.80E-07	Bacteria	Actinobacteriota	Thermoleophilia	Solirubrobacterales	Solirubrobacteraceae	Conexibacter
2e06e7f10a60f5883f82c7f6f2cd5033	pH	0.146958088	3.41E-05	Bacteria	Actinobacteriota	MB-A2-108	MB-A2-108	MB-A2-108	MB-A2-108
2f903b2ddd72e11472237e3a8e5884b9	pH	0.139050528	8.90E-05	Bacteria	Armatimonadota	Armatimonadia	Armatimonadales	Armatimonadales	Armatimonadales
3004acb0e2b4b3ed9052d3635de5234a	pH	0.09322649	0.008787593	Bacteria	Chloroflexi	Chloroflexia	Chloroflexales	Roseiflexaceae	uncultured
3058f63e974f4c0d72b9ae482394d829	pH	0.156785678	9.67E-06	Bacteria	Actinobacteriota	Actinobacteria	Micrococcales	Cellulomonadaceae	Cellulomonas
32977d3e03db24f454a61d8879d72605	pH	-0.097318039	0.00622397	Bacteria	Bacteroidota	Bacteroidia	Chitinophagales	Chitinophagaceae	Ferruginibacter
331e613ca0afc59bb980b7cbafad85bd	pH	-0.202864919	8.97E-09	Bacteria	Proteobacteria	Alphaproteobacteria	Acetobacterales	Acetobacteraceae	uncultured
33d1bee9cad266100aa03558531efded	pH	-0.152899422	1.61E-05	Bacteria	Proteobacteria	Alphaproteobacteria	Rhizobiales	Xanthobacteraceae	Pseudolabrys
35b2f90f668d6d59dcff7909ada87801	pH	0.227196822	1.07E-10	Bacteria	Proteobacteria	Alphaproteobacteria	Tistrellales	Geminicoccaceae	Candidatus_Alysiosphaera
3acfa27805581aaff475aded5e274247	pH	0.115555478	0.001147547	Bacteria	Chloroflexi	Chloroflexia	Kallotenuales	AKIW781	AKIW781
3ba30b13e742f0a7198beea2e1a6fc0c	pH	0.192139316	5.35E-08	Bacteria	Acidobacteriota	Blastocatellia	Blastocatellales	Blastocatellaceae	uncultured
3c358f9bed503b553f125a8c7a44a8bb	pH	0.08496432	0.016981461	Bacteria	Chloroflexi	Chloroflexia	Chloroflexales	Roseiflexaceae	uncultured
3cdccdc8d70f456ac21db1a154ddbe4f	pH	0.165541173	2.94E-06	Bacteria	Actinobacteriota	Thermoleophilia	Solirubrobacterales	67-14	67-14
3d23dfc4c8e01d3162419150d56d5cf1	pH	0.124113373	0.000475431	Bacteria	Bacteroidota	Bacteroidia	Chitinophagales	Chitinophagaceae	Ferruginibacter
3d4c09aa021170d8444fad01835fc475	pH	0.203771065	7.68E-09	Bacteria	Acidobacteriota	Thermoanaerobaculia	Thermoanaerobaculales	Thermoanaerobaculaceae	Subgroup_10
43836c03fa1baddf5e3cf86c580ebe84	pH	-0.279095797	1.39E-15	Bacteria	Acidobacteriota	Acidobacteriae	Acidobacteriales	uncultured	uncultured
47914372b2f9fdd281e34b2d2fb90076	pH	-0.253282318	5.15E-13	Bacteria	Acidobacteriota	Acidobacteriae	Solibacterales	Solibacteraceae	Candidatus_Solibacter
4909f01b8d6150544cb5a2513fe87bc2	pH	0.237038876	1.54E-11	Bacteria	Myxococcota	bacteriap25	bacteriap25	bacteriap25	bacteriap25
4932a486d5fd6fca630a53e65826e4c1	pH	0.137634589	0.000105154	Bacteria	Actinobacteriota	Thermoleophilia	Solirubrobacterales	67-14	67-14
4bada216e39df5b2dd02c371689049f3	pH	-0.169753037	1.62E-06	Bacteria	Actinobacteriota	Actinobacteria	Frankiales	Geodermatophilaceae	Geodermatophilus
5129d311de01b249b72d796480a80932	pH	0.076850497	0.030894027	Bacteria	Actinobacteriota	Acidimicrobiia	IMCC26256	IMCC26256	IMCC26256
56d4aeb037140ad89ffc2ecb0f48617b	pH	0.183476436	2.11E-07	Bacteria	Acidobacteriota	Blastocatellia	Pyrinomonadales	Pyrinomonadaceae	RB41
57eb7a5e928624b802128f2f12649f3d	pH	-0.115163061	0.001193243	Bacteria	Actinobacteriota	Actinobacteria	Kineosporiales	Kineosporiaceae
5ca46c57171e8378532a1e5d8817426a	pH	-0.164658293	3.33E-06	Bacteria	Planctomycetota	Planctomycetes	Gemmatales	Gemmataceae	uncultured
5ccdb1b3970176e828f01b1e1c690ac9	pH	-0.097650479	0.006048642	Bacteria	Proteobacteria	Alphaproteobacteria	Rhizobiales	Beijerinckiaceae	Methylobacterium-Methylorubrum
5e067cb40aa819e6b561b028a306d0a9	pH	0.132987418	0.000179511	Bacteria	Verrucomicrobiota	Verrucomicrobiae	Chthoniobacterales	Chthoniobacteraceae	Chthoniobacter
68b137a056c462623663fd50d1ebd570	pH	-0.174558157	8.08E-07	Bacteria	Actinobacteriota	Actinobacteria	Frankiales	Acidothermaceae	Acidothermus
6bfa0d416a004dab61d31218f443274a	pH	-0.100297171	0.004803735	Bacteria	Actinobacteriota	Thermoleophilia	Solirubrobacterales	Solirubrobacteraceae	Conexibacter
6edcd08f022e09ba87596b361f80edfb	pH	-0.150077206	2.31E-05	Bacteria	Actinobacteriota	Thermoleophilia	Solirubrobacterales	Solirubrobacteraceae	Conexibacter
6f675b3bdbdcb6015205c2942c849f39	pH	0.167486916	2.24E-06	Bacteria	Actinobacteriota	Thermoleophilia	Solirubrobacterales	67-14	67-14
6fdba8689de78ef0eee8b0cf181ec0b5	pH	0.169954459	1.58E-06	Bacteria	Proteobacteria	Alphaproteobacteria	Azospirillales	Azospirillaceae	Skermanella
71a13005b3af72922ba47e6d50b3c991	pH	0.097300259	0.006233474	Bacteria	Planctomycetota	Planctomycetes	Pirellulales	Pirellulaceae	Pir4_lineage
741d967cbbd14ee45ae73fa31da3d6aa	pH	0.131409504	0.000214421	Bacteria	Actinobacteriota	Thermoleophilia	Solirubrobacterales	Solirubrobacteraceae	Solirubrobacter
750127cfe76c82c41d3bd7ce3c39c91f	pH	-0.210599995	2.32E-09	Bacteria	Proteobacteria	Alphaproteobacteria	Rhizobiales	Xanthobacteraceae	Bradyrhizobium
753c892a8684964778c94c487e7db41b	pH	0.222220297	2.77E-10	Bacteria	Bacteroidota	Bacteroidia	Cytophagales	Hymenobacteraceae	Adhaeribacter
7701a172d9d43918c3e7aee1c33727bb	pH	0.204053931	7.31E-09	Bacteria	Acidobacteriota	Blastocatellia	Pyrinomonadales	Pyrinomonadaceae	RB41
79acf4ebcd164c8a5edf0760793b7f7f	pH	-0.186258374	1.37E-07	Bacteria	Proteobacteria	Alphaproteobacteria	Acetobacterales	Acetobacteraceae
7b31f645785809f1553a5226ea42dbb5	pH	0.079506789	0.02553094	Bacteria	Actinobacteriota	Acidimicrobiia
7fe8cd002df02147245c5aab6976fe06	pH	-0.089330624	0.012064137	Bacteria	Actinobacteriota	Actinobacteria	Frankiales
89106e77e3d564d53454f7975f12f257	pH	-0.224341181	1.85E-10	Bacteria	Chloroflexi	TK10	TK10	TK10	TK10
891d4583a99b49f00fd89936c5916cc7	pH	0.189075366	8.75E-08	Bacteria	Actinobacteriota	Actinobacteria	0319-7L14	0319-7L14	0319-7L14
896b36d6c365ab868dafc10d619c33f2	pH	0.151324947	1.97E-05	Bacteria	Acidobacteriota	Blastocatellia	Blastocatellales	Blastocatellaceae	Blastocatella
89cb3b7434cddd99870e07713c7b3f62	pH	-0.13699584	0.00011329	Bacteria	Proteobacteria	Alphaproteobacteria	Elsterales	uncultured	uncultured
8a8221ee39675c1304bc1d57bc193ffe	pH	0.207579719	3.96E-09	Bacteria	Acidobacteriota	Blastocatellia	Pyrinomonadales	Pyrinomonadaceae	RB41
8ea254ecd5328d2763a5f1f0979fa304	pH	0.211870726	1.85E-09	Bacteria	Gemmatimonadota	Longimicrobia	Longimicrobiales	Longimicrobiaceae	Longimicrobiaceae
98a6cb06680a3659aae94ce613e0d131	pH	0.22952775	6.83E-11	Bacteria	Proteobacteria	Alphaproteobacteria	Rhizobiales	Beijerinckiaceae	uncultured
9a5fb6011b6426c5528e175c10658f75	pH	0.190469431	7.00E-08	Bacteria	Acidobacteriota	Vicinamibacteria	Vicinamibacterales	uncultured	uncultured
9d48b3651468df06f0248d6f9c9714d4	pH	0.216040012	8.72E-10	Bacteria	Proteobacteria	Alphaproteobacteria	Rhizobiales	Beijerinckiaceae	Microvirga
a986a5c8c09cf7e2860b1cabe1a257d5	pH	0.196373877	2.68E-08	Bacteria	Chloroflexi	Chloroflexia	Thermomicrobiales	JG30-KF-CM45	JG30-KF-CM45
ab37b5673fdb0c1003c8a4f17445fff2	pH	-0.121361383	0.000635092	Bacteria	Actinobacteriota	Thermoleophilia	Solirubrobacterales	67-14	67-14
ac879ba22c7eb70d0406056a6e1d0ca5	pH	0.210247352	2.48E-09	Bacteria	Proteobacteria	Alphaproteobacteria	Rhizobiales	Beijerinckiaceae	uncultured
aeaa9d813af2ee7271df6fb1c1289ee5	pH	0.208684815	3.26E-09	Bacteria	Chloroflexi	Chloroflexia	Thermomicrobiales	JG30-KF-CM45	JG30-KF-CM45
b33712b153c32bc9d710bc39b0d028bc	pH	0.230559615	5.58E-11	Bacteria	Actinobacteriota	Rubrobacteria	Rubrobacterales	Rubrobacteriaceae	Rubrobacter
b70b5a24f7faac0d42ac77ecbb56854f	pH	0.089518366	0.011884355	Bacteria	Proteobacteria	Gammaproteobacteria	Burkholderiales	Nitrosomonadaceae	MND1
b9c6542b983f2d655d209d3236b12f28	pH	0.152060239	1.79E-05	Bacteria	Abditibacteriota	Abditibacteria	Abditibacteriales	Abditibacteriaceae	Abditibacterium
bb5a20cecec6d846445397e8381916fa	pH	-0.213825339	1.30E-09	Bacteria	Actinobacteriota	Actinobacteria	Frankiales	Acidothermaceae	Acidothermus
c8a9f2096514923d056689bcdda9342e	pH	0.147373361	3.24E-05	Bacteria	Proteobacteria	Alphaproteobacteria	Rhizobiales	uncultured	uncultured
c91a577e6137fedf4229142eb3be1596	pH	-0.17908336	4.12E-07	Bacteria	Chloroflexi	Ktedonobacteria	B12-WMSP1	B12-WMSP1	B12-WMSP1
cf28a50571ee5f0da54bd444d53aaf79	pH	-0.230418977	5.74E-11	Bacteria	Proteobacteria	Alphaproteobacteria	Elsterales	uncultured	uncultured
d041475ebeca4bda9d3f1ccb7172da39	pH	0.249942449	1.06E-12	Bacteria	Acidobacteriota	Vicinamibacteria	Vicinamibacterales	Vicinamibacteraceae	Vicinamibacteraceae
d14789e87c370e24a184c04f595d4d13	pH	0.223045671	2.37E-10	Bacteria	Acidobacteriota	Blastocatellia	Blastocatellales	Blastocatellaceae	Aridibacter
d5127ce6950254ff2eb9fc8592ba0078	pH	0.241607478	6.07E-12	Bacteria	Actinobacteriota	Rubrobacteria	Rubrobacterales	Rubrobacteriaceae	Rubrobacter
ddf73a4fb546f07c05d1b2d84d490ce8	pH	0.163264321	4.03E-06	Bacteria	Chloroflexi	KD4-96	KD4-96	KD4-96	KD4-96
e413e511cf3e0c6575134d88a59e39b9	pH	-0.217419657	6.77E-10	Bacteria	Acidobacteriota	Acidobacteriae	Acidobacteriales
ea173d08c8f3f94f5572835113a68cb0	pH	-0.276540441	2.57E-15	Bacteria	Proteobacteria	Gammaproteobacteria	Burkholderiales	Burkholderiaceae	Burkholderia-Caballeronia-Paraburkholderia
ee70d780bfc80f145d5c83fe688cf092	pH	-0.102932292	0.003798994	Bacteria	Planctomycetota	Planctomycetes	Isosphaerales	Isosphaeraceae	uncultured
f7b692cbeea4ea0b190a50dcb75d348e	pH	0.191674679	5.77E-08	Bacteria	Gemmatimonadota	Gemmatimonadetes	Gemmatimonadales	Gemmatimonadaceae	uncultured
fa6af782277c37327dfa5f5d4e2c1ca6	pH	0.102587995	0.003918437	Bacteria	Nitrospirota	Nitrospiria	Nitrospirales	Nitrospiraceae	Nitrospira
