# Supplementary material for: Biogeographical survey of soil microbiomes across sub-Saharan Africa: structure, drivers, and predicted climate-driven changes
Source: Microbiome. 2022 Aug 23;10:131. doi: 10.1186/s40168-022-01297-w (PMC9396824; doi:10.1186/s40168-022-01297-w)
Supplement: Supplementary file 17 — Additional file 16. Table S5. Taxonomy of the taxa considered as plant-growth-promoting. [file 40168_2022_1297_MOESM16_ESM.csv]

PGPB
ASV ID	Domain	Phylum	Class	Order	Family	Genus	Species
810ef8621acc87a125b12eebc9d8a85d	Bacteria	Proteobacteria	Alphaproteobacteria	Acetobacterales	Acetobacteraceae	Gluconacetobacter	Gluconacetobacter_diazotrophicus
bc1c6e675f70f742c5088506018893ac	Bacteria	Proteobacteria	Alphaproteobacteria	Azospirillales	Azospirillaceae	Azospirillum
b0f89b47f842ecd0d04ac052392688f6	Bacteria	Proteobacteria	Alphaproteobacteria	Azospirillales	Azospirillaceae	Azospirillum	Azospirillum_canadense
1a22a96f781ed1b2850d2323edfab6b9	Bacteria	Proteobacteria	Alphaproteobacteria	Azospirillales	Azospirillaceae	Azospirillum	Roseomonas_genomospecies
0585d2d5d80e91845b0dabb29d2d7f89	Bacteria	Proteobacteria	Alphaproteobacteria	Azospirillales	Azospirillaceae	Azospirillum	Azospirillum_thiophilum
c68bc24263da068b515c4d39908c63df	Bacteria	Proteobacteria	Alphaproteobacteria	Azospirillales	Azospirillaceae	Azospirillum	Rhodospirillaceae_bacterium
86381a87c3d464ead7373263904c88cf	Bacteria	Proteobacteria	Alphaproteobacteria	Azospirillales	Azospirillaceae	Azospirillum	Azospirillum_brasilense
8fa2758dfeaa288fe5c1b6d49a7f0ef6	Bacteria	Proteobacteria	Alphaproteobacteria	Azospirillales	Azospirillaceae	Azospirillum	uncultured_bacterium
4e4c80f7eee2f7b19c3236be90c8390a	Bacteria	Proteobacteria	Alphaproteobacteria	Azospirillales	Azospirillaceae	Azospirillum	Azospirillum_sp.
c25c6d6663a62c349b502812a02c28d7	Bacteria	Proteobacteria	Gammaproteobacteria	Burkholderiales	Comamonadaceae	Rhizobacter
7d748a8afde638cac9d077aa1977c2b2	Bacteria	Actinobacteriota	Actinobacteria	Frankiales	Frankiaceae	Frankia
be58f42275fd280b16b8bf69dbc998e8	Bacteria	Actinobacteriota	Actinobacteria	Frankiales	Frankiaceae	Frankia	uncultured_bacterium
6eab43ad36aa985d27dca4d32f78635c	Bacteria	Actinobacteriota	Actinobacteria	Frankiales	Frankiaceae	Frankia	Frankia_sp.
b2bcf283fea65bac802f8335b09cd37e	Bacteria	Proteobacteria	Gammaproteobacteria	Burkholderiales	Oxalobacteraceae	Herbaspirillum
cdbe7f677bee119ca38226311e855f74	Bacteria	Firmicutes	Bacilli	Paenibacillales	Paenibacillaceae	Paenibacillus	uncultured_Firmicutes
8779815b32f1c21bb56db60ec1e4ba21	Bacteria	Firmicutes	Bacilli	Paenibacillales	Paenibacillaceae	Paenibacillus	Paenibacillus_alginolyticus
7d64f0f453f8e6707228e0ef7d34ac97	Bacteria	Firmicutes	Bacilli	Paenibacillales	Paenibacillaceae	Paenibacillus	Paenibacillus_ehimensis
8061ed41c54ed056e687d56adceb17c2	Bacteria	Firmicutes	Bacilli	Paenibacillales	Paenibacillaceae	Paenibacillus	Paenibacillus_mucilaginosus
baedb8133f8ba7dd36db04b4712d2f11	Bacteria	Firmicutes	Bacilli	Paenibacillales	Paenibacillaceae	Paenibacillus	Paenibacillus_edaphicus
5c12e01923ae4032fbc83c7710028e01	Bacteria	Firmicutes	Bacilli	Paenibacillales	Paenibacillaceae	Paenibacillus	Paenibacillus_kobensis
768cb23477c1f5956e883c8bd759be11	Bacteria	Firmicutes	Bacilli	Paenibacillales	Paenibacillaceae	Paenibacillus	Paenibacillus_elgii
e3c30e298a914af4177d5e192809f333	Bacteria	Firmicutes	Bacilli	Paenibacillales	Paenibacillaceae	Paenibacillus	Paenibacillus_xylanilyticus
b13bea7bd77f5d6ddece9aa572c780f9	Bacteria	Firmicutes	Bacilli	Paenibacillales	Paenibacillaceae	Paenibacillus	Gorillibacterium_massiliense
7c2ebf9467e61b1860fe3e531d77610b	Bacteria	Firmicutes	Bacilli	Paenibacillales	Paenibacillaceae	Paenibacillus	Paenibacillus_macerans
15c1d887b5a01318fd2144dc4544f6a0	Bacteria	Firmicutes	Bacilli	Paenibacillales	Paenibacillaceae	Paenibacillus	Paenibacillus_naphthalenovorans
caa9352d63041832a8c29ed767ad6696	Bacteria	Firmicutes	Bacilli	Paenibacillales	Paenibacillaceae	Paenibacillus	Paenibacillus_durus
1b3f003143cbe3efd3a30606b1a03e63	Bacteria	Firmicutes	Bacilli	Paenibacillales	Paenibacillaceae	Paenibacillus	Paenibacillus_hemerocallicola
51a8d14c8b3021cc40586cf1133b4c9e	Bacteria	Firmicutes	Bacilli	Paenibacillales	Paenibacillaceae	Paenibacillus	Paenibacillus_beijingensis
2ff1a7ab4689dd3076d81f340332b76b	Bacteria	Proteobacteria	Gammaproteobacteria	Pseudomonadales	Pseudomonadaceae	Pseudomonas	Pseudomonas_alcaligenes
f07a2134d2f1ef78313ee45549126283	Bacteria	Proteobacteria	Alphaproteobacteria	Rhizobiales	Rhizobiaceae	Allorhizobium-Neorhizobium-Pararhizobium-Rhizobium
e64d460b2427452b91b758c791f1b867	Bacteria	Proteobacteria	Alphaproteobacteria	Rhizobiales	Rhizobiaceae	Mesorhizobium	Mesorhizobium_plurifarium
8c6fad46870b6c46d8f84ca40ddd4177	Bacteria	Proteobacteria	Alphaproteobacteria	Rhizobiales	Rhizobiaceae	Mesorhizobium
36ceeed142ab4b18b540a1fdbf8c5ad0	Bacteria	Proteobacteria	Alphaproteobacteria	Rhizobiales	Rhizobiaceae	Allorhizobium-Neorhizobium-Pararhizobium-Rhizobium	Rhizobiales_bacterium
55de2badbebd6fd7217e35e047fda16c	Bacteria	Proteobacteria	Alphaproteobacteria	Rhizobiales	Rhizobiaceae	Allorhizobium-Neorhizobium-Pararhizobium-Rhizobium	uncultured_soil
55ec0dd067db6508af233d3dc4ba97f8	Bacteria	Proteobacteria	Alphaproteobacteria	Rhizobiales	Rhizobiaceae	Allorhizobium-Neorhizobium-Pararhizobium-Rhizobium	Rhizobium_sullae
ac699cd1d7056e900030224d0d312484	Bacteria	Proteobacteria	Alphaproteobacteria	Rhizobiales	Rhizobiaceae	Mesorhizobium	Mesorhizobium_albiziae
e2eb537e6cdd79e6d440e27caf6e05d8	Bacteria	Proteobacteria	Alphaproteobacteria	Rhizobiales	Rhizobiaceae	Allorhizobium-Neorhizobium-Pararhizobium-Rhizobium	Neorhizobium_sp.
96cba532db847dec0dc650864abd5cc4	Bacteria	Proteobacteria	Alphaproteobacteria	Rhizobiales	Rhizobiaceae	Allorhizobium-Neorhizobium-Pararhizobium-Rhizobium	Rhizobium_petrolearium
86d2775be32006806d20bc940b20f084	Bacteria	Proteobacteria	Gammaproteobacteria	Burkholderiales	Rhodocyclaceae	Azoarcus
750127cfe76c82c41d3bd7ce3c39c91f	Bacteria	Proteobacteria	Alphaproteobacteria	Rhizobiales	Xanthobacteraceae	Bradyrhizobium
2ec5d2a2c4e685afb5a7dd1814730203	Bacteria	Proteobacteria	Alphaproteobacteria	Rhizobiales	Xanthobacteraceae	Bradyrhizobium	metagenome
59b1cd98cae75be5562f0c9d584f8c60	Bacteria	Cyanobacteria	Cyanobacteriia	Leptolyngbyales	Leptolyngbyaceae	Scytolyngbya_XSP1
7a697ad4fb73fb231f70f02c0685157a	Bacteria	Cyanobacteria	Cyanobacteriia	Cyanobacteriales	Nostocaceae	Scytonema_UTEX_2349
2a753daac90ae5f998d3843e6705f534	Bacteria	Cyanobacteria	Cyanobacteriia	Cyanobacteriales	Nostocaceae	Scytonema_PCC-7110	Scytonema_sp.
e6e0296afc03e6e752f3fa9cc7800592	Bacteria	Cyanobacteria	Cyanobacteriia	Cyanobacteriales	Nostocaceae	Scytonema_VB-61278	Nostocales_cyanobacterium
e38c2c2ae32a3e303c79cb1a74dff155	Bacteria	Cyanobacteria	Cyanobacteriia	Cyanobacteriales	Nostocaceae	Scytonema_UTEX_2349	Tolypothrix_sp.
79fdbe384bc96fbb9e63cde4c84c84bf	Bacteria	Cyanobacteria	Cyanobacteriia	Cyanobacteriales	Nostocaceae	Scytonema_PCC-7110
8638843c0906f0ba8ffef467d03abbb7	Bacteria	Cyanobacteria	Cyanobacteriia	Cyanobacteriales	Nostocaceae	Scytonema_VB-61278
c179e698d1cd96a0e69d37c3c6573ccd	Bacteria	Cyanobacteria	Cyanobacteriia	Cyanobacteriales	Nostocaceae	Scytonema_VB-61278	uncultured_bacterium
b10e3a20850fac5dcfa700dbc3f08e89	Bacteria	Cyanobacteria	Cyanobacteriia	Cyanobacteriales	Nostocaceae	Scytonema_PCC-7110	uncultured_bacterium
2675678e348ec8972f195007c6548abd	Bacteria	Cyanobacteria	Cyanobacteriia	Cyanobacteriales	Nostocaceae	Scytonema_UCFS19	uncultured_bacterium
b51475a8d377692d224f82dcf8140af1	Bacteria	Cyanobacteria	Cyanobacteriia	Cyanobacteriales	Nostocaceae	Nostoc_PCC-7524
32c80dead40772f09f9c75426892ad1b	Bacteria	Cyanobacteria	Cyanobacteriia	Cyanobacteriales	Nostocaceae	Nostoc_PCC-7107	Nostoc_sp.
7f106e373573a5741ee5113d5797b3b4	Bacteria	Cyanobacteria	Cyanobacteriia	Cyanobacteriales	Nostocaceae	Nostoc_PCC-7524	Nostoc_sp.
309949d17356b55cbd54d30165364b93	Bacteria	Cyanobacteria	Cyanobacteriia	Cyanobacteriales	Nostocaceae	Nostoc_PCC-7524	Aliinostoc_sp.
0e5588f2fffd3020282859d752c243f4	Bacteria	Cyanobacteria	Cyanobacteriia	Cyanobacteriales	Nostocaceae	Nostoc_PCC-73102
d367dab625d18d70d1d6126316ba74b9	Bacteria	Cyanobacteria	Cyanobacteriia	Cyanobacteriales	Nostocaceae	Nostoc_PCC-7524	Anabaena_sp.
41ab1e7c7150578bef9a13908ab228a9	Bacteria	Cyanobacteria	Cyanobacteriia	Cyanobacteriales	Nostocaceae	Nostoc_PCC-7107	Nostoc_ellipsosporum
cf1fa6e0c9d102b38ee12f212b9f8900	Bacteria	Cyanobacteria	Cyanobacteriia	Cyanobacteriales	Nostocaceae	Nostoc_PCC-7107	uncultured_Streptostemon
4b62a6a620fb6342dc21bbf1240e0ab1	Bacteria	Cyanobacteria	Cyanobacteriia	Cyanobacteriales	Nostocaceae	Nostoc_BDU-40302	Anabaena_sp.
ff3c1be5b4bb8b898ccc2bf4c390c4fb	Bacteria	Cyanobacteria	Cyanobacteriia	Cyanobacteriales	Nostocaceae	Nostoc_PCC-7524	Nostoc_elgonense
5348b328ea18b2239f79a873b385ff76	Bacteria	Cyanobacteria	Cyanobacteriia	Cyanobacteriales	Nostocaceae	Nostoc_PCC-8976	Nostoc_sp.
76855dc3e82e69fdc404a511da7da252	Bacteria	Cyanobacteria	Cyanobacteriia	Cyanobacteriales	Nostocaceae	Nostoc_BDU-40302	Nodularia_sp.
47f4f6d67217b1ba108b6b2adb071d01	Bacteria	Cyanobacteria	Cyanobacteriia	Cyanobacteriales	Nostocaceae	Nostoc_PCC-7524	Trichormus_variabilis
b60ca6991ed1206716a837b8611bb866	Bacteria	Cyanobacteria	Cyanobacteriia	Cyanobacteriales	Nostocaceae	Nostoc_PCC-7107	Anabaenopsis_circularis
fe950d754d11d05fd92f0df015f8df59	Bacteria	Cyanobacteria	Cyanobacteriia	Cyanobacteriales	Nostocaceae	Nostoc_PCC-8976	Nostoc_elgonense
PGPF
ASV ID	Kingdom	Phylum	Class	Order	Family	Genus	Species
02439fdda46b705c13687019866d8cd2	Fungi	Glomeromycota	Glomeromycetes	Glomerales	Claroideoglomeraceae	Claroideoglomus	Unknown
0253967952c0717930d4cf75bbf2327a	Fungi	Glomeromycota	Glomeromycetes	Gigasporales	Gigasporaceae	Scutellospora	Unknown
0d08a57aeceed20eb2a255bdb81a2b73	Fungi	Glomeromycota	Glomeromycetes	Gigasporales	Gigasporaceae	Dentiscutata	Dentiscutata_erythropus
118949dee4aa2fcd013ef87c89e88136	Fungi	Glomeromycota	Glomeromycetes	Gigasporales	Gigasporaceae	Racocetra	Unknown
18ee5e69fb47412cc5fbae1ad0125467	Fungi	Glomeromycota	Glomeromycetes	Glomerales	Glomeraceae	Glomus	Glomus_versiforme
191ed25a93b78b9d238d349525ed6a33	Fungi	Glomeromycota	Paraglomeromycetes	Paraglomerales	Paraglomeraceae	Paraglomus	Unknown
1d0c144e3ab82ca7c4848c0987cb085d	Fungi	Glomeromycota	Glomeromycetes	Glomerales	Glomeraceae	Septoglomus	Septoglomus_viscosum
1de40069a47c05b1d7a14a6bd1e3d672	Fungi	Glomeromycota	Glomeromycetes	Diversisporales	Diversisporales_fam_Incertae_sedis	Entrophospora	Unknown
1f4172ade01e1e4bc00a6e977cf1625a	Fungi	Glomeromycota	Glomeromycetes	Glomerales	Claroideoglomeraceae	Claroideoglomus	Claroideoglomus_etunicatum
21d8d0fd8219e6b3b667d5a6e3a9c574	Fungi	Glomeromycota	Glomeromycetes	Diversisporales	Unknown	Unknown	Unknown
294d60e59ec42fa92c96170817fed9fa	Fungi	Glomeromycota	Glomeromycetes	Unknown	Unknown	Unknown	Unknown
2a210f50ab7fa5d17a7abf7968644e44	Fungi	Glomeromycota	Glomeromycetes	Diversisporales	Acaulosporaceae	Acaulospora	Unknown
2c0d88a7d37d22329b8eac51e071daf5	Fungi	Glomeromycota	Paraglomeromycetes	Unknown	Unknown	Unknown	Unknown
310c90dc1e34045a711e7b951cb516fc	Fungi	Glomeromycota	Glomeromycetes	Glomerales	Glomeraceae	Glomus	Glomus_cubense
317bb89c9147abb233729dafdc3c823f	Fungi	Glomeromycota	Glomeromycetes	Gigasporales	Gigasporaceae	Gigaspora	Gigaspora_albida
3185632405984560f230f8aaa3705ce1	Fungi	Glomeromycota	Unknown	Unknown	Unknown	Unknown	Unknown
3a3d28b108a5c81fec53201db739c6a4	Fungi	Glomeromycota	Glomeromycetes	Gigasporales	Gigasporaceae	Gigaspora	Unknown
3c3b8b01a9b17c75c3df5f5bc887d873	Fungi	Glomeromycota	Glomeromycetes	Gigasporales	Gigasporaceae	Scutellospora	Scutellospora_castanea
42b5e5e9d553210270bd5f51c2816622	Fungi	Glomeromycota	Glomeromycetes	Diversisporales	Diversisporaceae	Redeckera	Unknown
5314e5d2d55a507f8fcc3e13f64dc11d	Fungi	Glomeromycota	Glomeromycetes	Diversisporales	Acaulosporaceae	Unknown	Unknown
54bc3dc6c7419369c0cd7963f47bcb96	Fungi	Glomeromycota	Paraglomeromycetes	Paraglomerales	Unknown	Unknown	Unknown
56361a996752ee90b5dc1552441f993b	Fungi	Glomeromycota	Glomeromycetes	Glomerales	Glomeraceae	Funneliformis	Unknown
583018df90fbeef07a88daa04b7a7be4	Fungi	Glomeromycota	Glomeromycetes	Glomerales	Glomeraceae	Unknown	Unknown
6e78da8738d8c556a627daf46e52bda7	Fungi	Glomeromycota	Glomeromycetes	Gigasporales	Gigasporaceae	Dentiscutata	Unknown
73b0025573eb618c5f3f2c7b983dba1c	Fungi	Glomeromycota	Glomeromycetes	Glomerales	Glomeraceae	Glomus	Glomus_invermaium
75bff7d6ff146c8c1b4e348f5a6e1216	Fungi	Glomeromycota	Glomeromycetes	Glomerales	Glomeraceae	Dominikia	Dominikia_iranica
8c30af31632a1cc49d010d339b89b43e	Fungi	Glomeromycota	Glomeromycetes	Glomerales	Unknown	Unknown	Unknown
9312fdeb4ace5291f72996652d5d0900	Fungi	Glomeromycota	Glomeromycetes	Diversisporales	Diversisporaceae	Unknown	Unknown
94b042f307b94ee1b32edcb0784f83ae	Fungi	Glomeromycota	Glomeromycetes	Glomerales	Glomeraceae	Kamienskia	Kamienskia_perpusilla
9aa547cd006f40b4080e000e5da9d0fb	Fungi	Glomeromycota	Glomeromycetes	Glomerales	Glomeraceae	Glomus	Glomus_aggregatum
9aa6d5785da64b806e0ba817fc035cee	Fungi	Glomeromycota	Glomeromycetes	Glomerales	Glomeraceae	Glomus	Unknown
9b17c10bf591708d52e477a774695159	Fungi	Glomeromycota	Glomeromycetes	Diversisporales	Acaulosporaceae	Acaulospora	Acaulospora_lacunosa
9eee4e9ee7cc8e0eef1da30e992df3be	Fungi	Glomeromycota	Glomeromycetes	Diversisporales	Diversisporaceae	Redeckera	Redeckera_pulvinatum
a51e49ef7c396c8ff8cc3e4f4cd7ab44	Fungi	Glomeromycota	Glomeromycetes	Gigasporales	Gigasporaceae	Unknown	Unknown
a61e72e08828b6a9bf2776cbc05d8e1d	Fungi	Glomeromycota	Glomeromycetes	Glomerales	Glomeraceae	Dominikia	Unknown
a63b46b9f673b1a2a476f1ba974552ba	Fungi	Glomeromycota	Glomeromycetes	Glomerales	Claroideoglomeraceae	Unknown	Unknown
a83d9776d4d69b4d249d00bfd454c82f	Fungi	Glomeromycota	Archaeosporomycetes	Archaeosporales	Archaeosporaceae	Unknown	Unknown
abb26f181d2040478380905bf9a29882	Fungi	Glomeromycota	Glomeromycetes	Glomerales	Glomeraceae	Glomus	Glomus_indicum
abfe4c3ed26ebc10a1deb283842061ba	Fungi	Glomeromycota	Paraglomeromycetes	Paraglomerales	Paraglomeraceae	Paraglomus	Paraglomus_brasilianum
ac3ea88049070799897f2043b83fb5b0	Fungi	Glomeromycota	Glomeromycetes	Diversisporales	Diversisporaceae	Redeckera	Redeckera_fulvum
b3525e9c24ccb3f9a9c83d96cb15387c	Fungi	Glomeromycota	Archaeosporomycetes	Archaeosporales	Unknown	Unknown	Unknown
b804a8d0e62dda0e9f682b2ba0f2161a	Fungi	Glomeromycota	Glomeromycetes	Diversisporales	Diversisporaceae	Diversispora	Diversispora_trimurales
baafbb7470350224e7b8b19c9322d49b	Fungi	Glomeromycota	Glomeromycetes	Gigasporales	Gigasporaceae	Cetraspora	Cetraspora_pellucida
bbedd2c460ebeb20486783857e773697	Fungi	Glomeromycota	Archaeosporomycetes	Archaeosporales	Ambisporaceae	Ambispora	Ambispora_appendicula
c005f5dcbf3371c5cd36e88669e9df46	Fungi	Glomeromycota	Glomeromycetes	Gigasporales	Gigasporaceae	Scutellospora	Scutellospora_cerradensis
c4b53e384c56e8e92f772768f288fdab	Fungi	Glomeromycota	Archaeosporomycetes	Archaeosporales	Archaeosporaceae	Archaeospora	Unknown
c53a67c7ce6b55f06440ee5ae07e635d	Fungi	Glomeromycota	Paraglomeromycetes	GS24	Unknown	Unknown	Unknown
cf308038ffb8ec39f88b83cff5f65f01	Fungi	Glomeromycota	Glomeromycetes	Diversisporales	Diversisporaceae	Diversispora	Unknown
cfb814017358a116210a1d90353e61e5	Fungi	Glomeromycota	Glomeromycetes	Glomerales	Glomeraceae	Funneliformis	Funneliformis_mosseae
cfc27c6a91bd8ad24a1138844ff0dab7	Fungi	Glomeromycota	Glomeromycetes	Glomerales	Glomeraceae	Rhizophagus	Rhizophagus_prolifer
e1ba931e3f60292297151f142f1d97ed	Fungi	Glomeromycota	Glomeromycetes	Gigasporales	Gigasporaceae	Gigaspora	Gigaspora_margarita
ebc795683a9a20db68c2acfb871688dc	Fungi	Glomeromycota	Glomeromycetes	Glomerales	Glomeraceae	Septoglomus	Unknown
f68d7fa8ed695d8e9113895b485d8b33	Fungi	Glomeromycota	Glomeromycetes	Glomerales	Claroideoglomeraceae	Claroideoglomus	Claroideoglomus_claroideum
f6cd8b3accd1d2a43ff8df32d19cce42	Fungi	Glomeromycota	Glomeromycetes	Glomerales	Glomeraceae	Rhizophagus	Unknown
f84fe3d933e5609b3321fb62be172913	Fungi	Glomeromycota	Glomeromycetes	Gigasporales	Gigasporaceae	Cetraspora	Unknown
ff5a7047dbeaaa24f6ed464cee73ad3b	Fungi	Glomeromycota	Archaeosporomycetes	Archaeosporales	Ambisporaceae	Ambispora	Unknown
