# Supplementary material for: Biogeographical survey of soil microbiomes across sub-Saharan Africa: structure, drivers, and predicted climate-driven changes
Source: Microbiome. 2022 Aug 23;10:131. doi: 10.1186/s40168-022-01297-w (PMC9396824; doi:10.1186/s40168-022-01297-w)
Supplement: Supplementary file 18 — Additional file 17. Table S6. Net estimates and corresponding significance values for the environmental variables associated with soil health in the SEM model. [file 40168_2022_1297_MOESM17_ESM.csv]

Bacterial
Explanatory Var.	Response Var.	net std.coeff
MAP	PGPB	0.422005754
MAT	PGPB	-0.269524195
N_Percent	PGPB	0.04681558
C_percent	PGPB	0
Na	PGPB	0.120908384
pH	PGPB	-0.2077
EVI2	PGPB	0.0240932
MAP	Shannon	-0.045218779
MAT	Shannon	-0.006298941
N_Percent	Shannon	-0.03856594
C_percent	Shannon	0.0982
Na	Shannon	0.040770416
pH	Shannon	0.1711
EVI2	Shannon	-0.0198476
Fungal
Explanatory Var.	Response Var.	net std.coeff
MAP	PGPF	0.368579786
MAT	PGPF	0.149644775
N_Percent	PGPF	-0.06437424
C_percent	PGPF	0
Na	PGPF	0.251702451
pH	PGPF	0.2856
EVI2	PGPF	0.1111704
MAP	Shannon	0.490623449
MAT	Shannon	0.078161714
N_Percent	Shannon	-0.02156537
C_percent	Shannon	0
Na	Shannon	0.199720321
pH	Shannon	0.095676
EVI2	Shannon	0.0483405
