# Supplementary material for: Biogeographical survey of soil microbiomes across sub-Saharan Africa: structure, drivers, and predicted climate-driven changes
Source: Microbiome. 2022 Aug 23;10:131. doi: 10.1186/s40168-022-01297-w (PMC9396824; doi:10.1186/s40168-022-01297-w)
Supplement: Supplementary file 19 — Additional file 18. Table S7. Number of samples allocated for each country, and number of samples collected. [file 40168_2022_1297_MOESM18_ESM.csv]

Nation	Total land area (km2)	Land area ratio (c.f. RSA)	Allocation of samples		Approx. distance travelled for samples (km)
				Samples acquired
RSA	1221000	1	170	236	8500
Benin	114 763	0.09	16	15	799
Cote d�Ivoire	322 463	0.26	45	45	2245
Namibia	825 615	0.68	115	141	5748
Botswana	600 370	0.49	84	89	4179
Zimbabwe	390 757	0.32	54	28	2720
Mozambique	801�590	0.66	112	96	5580
Kenya	581 309	0.48	81	70	4047
Zambia	751 608	0.62	105	90	5232
			782	810	46736
